# Supplementary material for: Metabolic dependencies govern microbial syntrophies during methanogenesis in an anaerobic digestion ecosystem
Source: Microbiome. 2020 Feb 15;8:22. doi: 10.1186/s40168-019-0780-9 (PMC7024554; doi:10.1186/s40168-019-0780-9)
Supplement: Supplementary file 2 — Additional file 1. The genome quality of all MAGs. [file 40168_2019_780_MOESM1_ESM.xlsx]

## Sheet: Sheet1
	Genome size	Longest contig	marker lineage	GC	GC std	scaffolds	Completeness	Contamination	genome_quality	contigs	markers	Coding density	Mean contig length	marker sets	N50 (contigs)	Longest scaffold	predicted genes	N50 (scaffolds)	ambiguous bases	Mean scaffold length	average coverage	average RPKM	MAG present in top deciles
DTU623	2163084	7785	c__Bacilli	0.339513	0.0323188	2193	86.5193	3.03867	M	2193	325	0.999426	986.358	181	1257	7785	2186	1257	0	986.358	27.232	22.0126
DTU598	2408418	7995	c__Clostridia	0.373415	0.0342294	2626	91.8011	2.41935	H	2626	223	0.99931	917.143	124	1164	7995	2614	1164	0	917.143	9.55008	20.0899
DTU604	2138970	7245	c__Clostridia	0.507776	0.0394528	2540	90.8886	4.31842	H	2540	420	0.997433	842.114	196	1077	7245	2521	1077	0	842.114	7.15891	17.6204
DTU605	1749609	8658	c__Clostridia	0.50515	0.0417326	2077	91.8691	1.34409	H	2077	223	0.998654	842.373	124	1068	8658	2065	1068	0	842.373	77.4457	29.5869	X
DTU614	2391582	7614	c__Clostridia	0.423848	0.0360163	2570	93.1191	1.6129	H	2570	223	0.99833	930.577	124	1143	7614	2550	1143	0	930.577	12.7458	14.4429
DTU643	2344398	8001	c__Clostridia	0.361975	0.0382557	2511	99.1935	0	H	2511	223	0.999132	933.651	124	1164	8001	2501	1164	0	933.651	55.6089	42.8314
DTU646	1512156	7158	c__Clostridia	0.409022	0.0546324	1940	63.1492	4.20918	M	1940	420	0.998207	779.462	196	1020	7158	1929	1020	0	779.462	7.84334	19.4075
DTU594	3262170	6288	c__Gammaproteobacteria	0.647535	0.0325076	3524	98.4984	2.79856	H	3524	544	0.995586	925.701	284	1179	6288	3468	1179	0	925.701	350.589	177.03	X
DTU583	2002995	5547	f__Rhodocyclaceae	0.657174	0.0355419	2026	96.1272	0.207469	H	2026	540	0.998499	988.645	241	1203	5547	2019	1203	0	988.645	178.982	161.857	X
DTU613	271218	5061	k__Archaea	0.557935	0.0488757	288	0.934579	0	L	288	149	0.995609	941.729	107	1212	5061	284	1212	0	941.729	12.4263	14.3182
DTU568	704538	3534	k__Bacteria	0.515813	0.0429551	983	33.3856	1.01881	L	983	104	0.995814	716.722	58	942	3534	970	942	0	716.722	6.0544	13.9468
DTU569	4224597	5814	k__Bacteria	0.639744	0.0485951	4361	90.9091	7.90909	M	4361	163	0.99672	968.722	110	1185	5814	4312	1185	0	968.722	29.3052	22.4824
DTU571	285129	6327	k__Bacteria	0.53104	0.0376209	346	6.14035	0	L	346	103	0.998538	824.072	57	1092	6327	344	1092	0	824.072	8.12424	13.0039
DTU576	418839	3564	k__Bacteria	0.460339	0.0335438	434	13.7931	0	L	434	104	0.999098	965.067	58	1218	3564	432	1218	0	965.067	83.2487	93.4189
DTU582	1195965	4164	k__Bacteria	0.450642	0.0328779	1324	35.3448	18.1034	L	1324	104	0.999742	903.297	58	1146	4164	1323	1146	0	903.297	320.477	151.251
DTU585	4017984	20235	k__Bacteria	0.56274	0.021867	3544	96.4841	0.574713	H	3544	142	0.995626	1133.74	87	1404	20235	3482	1404	0	1133.74	19.1539	14.0546
DTU586	1623108	4962	k__Bacteria	0.482301	0.0391077	1721	77.9661	0	M	1721	105	0.999305	943.119	59	1161	4962	1717	1161	0	943.119	73.8208	145.53
DTU587	2923614	6075	k__Bacteria	0.568184	0.040854	3388	58.4646	4.09091	M	3388	163	0.99768	862.932	110	1101	6075	3364	1101	0	862.932	5.18492	10.909
DTU588	4397664	12501	k__Bacteria	0.609396	0.0406218	4275	91.5909	6.24242	M	4275	163	0.997624	1028.69	110	1233	12501	4236	1233	0	1028.69	31.7721	22.3972
DTU590	2802330	12258	k__Bacteria	0.647881	0.035774	2782	90.9091	5.63636	M	2782	163	0.998985	1007.31	110	1218	12258	2767	1218	0	1007.31	27.9392	9.40962
DTU591	1115958	4962	k__Bacteria	0.502695	0.0337108	1178	64.4068	0	M	1178	105	0.999382	947.333	59	1134	4962	1175	1134	0	947.333	87.1813	151.342	X
DTU595	543822	2658	k__Bacteria	0.555634	0.0304501	606	0.478469	0	L	606	103	0.998031	897.396	57	1029	2658	602	1029	0	897.396	14.7243	36.1465
DTU597	1496511	4509	k__Bacteria	0.424711	0.0360661	1557	84.8634	0.564663	M	1557	273	0.997532	961.15	183	1251	4509	1536	1251	0	961.15	14.8021	15.6177
DTU606	512883	4386	k__Bacteria	0.31963	0.0394976	566	2.23285	0	L	566	103	0.999579	906.154	57	1167	4386	565	1167	0	906.154	17.4734	12.4364
DTU609	232737	2796	k__Bacteria	0.479924	0.0308025	259	20.6897	0	L	259	104	0.999536	898.598	58	1134	2796	258	1134	0	898.598	150.561	187.031
DTU611	1852476	4170	k__Bacteria	0.341149	0.0337347	2010	99.0826	0	H	2010	180	0.999786	921.63	109	1161	4170	2008	1161	0	921.63	55.5505	31.117
DTU618	609819	3660	k__Bacteria	0.527088	0.0224573	780	20.6897	0	L	780	104	0.998682	781.819	58	1011	3660	777	1011	0	781.819	5.41714	13.2409
DTU621	3491295	8235	k__Bacteria	0.658421	0.0310589	3603	91.8182	3.82002	H	3603	163	0.997296	968.997	110	1188	8235	3570	1188	0	968.997	30.8335	22.3546
DTU625	1582386	4980	k__Bacteria	0.541341	0.0393984	1903	70.5701	1.849	M	1903	105	0.99832	831.522	59	1053	4980	1892	1053	0	831.522	7.1845	14.6737
DTU632	1065774	6114	k__Bacteria	0.450166	0.0202622	1226	100	1.78571	H	1226	102	0.999719	869.31	56	1077	6114	1225	1077	0	869.31	932.081	223.431	X
DTU633	2467959	9171	k__Bacteria	0.500927	0.0280132	2777	90.7407	3.08642	H	2777	161	0.997163	888.714	108	1146	9171	2748	1146	0	888.714	7.63698	10.5515
DTU634	917793	4161	k__Bacteria	0.599381	0.0333769	1145	28.046	0	L	1145	274	0.998519	801.566	183	1050	4161	1141	1050	0	801.566	4.84993	8.95671
DTU637	585861	3462	k__Bacteria	0.377858	0.0276137	766	9.40439	0	L	766	104	0.999483	764.832	58	1029	3462	765	1029	0	764.832	4.64348	14.95
DTU638	937290	4956	k__Bacteria	0.455844	0.0265856	1024	64.9461	0	M	1024	105	0.999209	915.322	59	1146	4956	1020	1146	0	915.322	629.043	448.564	X
DTU641	1774068	4602	k__Bacteria	0.314322	0.0282423	1875	92.1839	7.41379	M	1875	103	0.999239	946.17	58	1155	4602	1870	1155	0	946.17	101.079	35.3201	X
DTU642	1153020	4800	k__Bacteria	0.306751	0.0341721	1274	99.8788	0	H	1274	126	0.999316	905.039	75	1176	4800	1270	1176	0	905.039	14.399	9.70704
DTU644	1787580	4956	k__Bacteria	0.421774	0.0264889	1985	100	0	H	1985	105	0.998048	900.544	59	1089	4956	1964	1089	0	900.544	40.1155	18.367
DTU570	2718003	8745	o__Clostridiales	0.413599	0.0340826	2881	98.6014	0.34965	H	2881	250	0.997801	943.423	143	1206	8745	2851	1206	0	943.423	296.358	226.341	X
DTU577	2631786	5622	o__Clostridiales	0.448508	0.0329752	2844	91.9362	3.51836	H	2844	250	0.998439	925.382	143	1179	5622	2822	1179	0	925.382	8.58244	22.2434
DTU581	1708290	7551	o__Clostridiales	0.550015	0.0349349	1869	86.5213	3.02013	M	1869	263	0.998126	914.013	149	1173	7551	1852	1173	0	914.013	6.88604	15.1662
DTU603	1886988	7518	o__Clostridiales	0.477004	0.045348	1956	95.4698	0.671141	H	1956	263	0.997938	964.718	149	1197	7518	1934	1197	0	964.718	28.0305	12.0453
DTU620	3658173	8679	o__Clostridiales	0.365918	0.0377963	3836	98.1469	5.12821	M	3836	250	0.998847	953.643	143	1200	8679	3814	1200	0	953.643	10.5858	15.4092
DTU630	1560198	7542	o__Clostridiales	0.525592	0.0471188	1648	96.6443	0.671141	H	1648	263	0.995579	946.722	149	1176	7542	1608	1176	0	946.722	345.426	107.67	X
DTU631	1699254	6102	o__Clostridiales	0.47793	0.030329	1847	93.9716	1.41844	H	1847	247	0.998547	920.008	141	1182	6102	1830	1182	0	920.008	20.8764	21.3229
DTU636	1385490	7362	o__Clostridiales	0.44548	0.0323508	1532	84.4309	1.19687	M	1532	263	0.998792	904.367	149	1164	7362	1524	1164	0	904.367	7.00608	28.5367
DTU610	1755000	5049	p__Bacteroidetes	0.302272	0.0312456	1702	93.4921	0.714286	H	1702	316	0.999499	1031.14	210	1281	5049	1697	1281	0	1031.14	128.913	29.9295	X
DTU612	2025783	12081	p__Bacteroidetes	0.301525	0.0351586	1906	95.3571	1.34921	H	1906	316	0.999036	1062.85	210	1299	12081	1894	1299	0	1062.85	663.58	81.3183	X
DTU592	1585473	8787	p__Euryarchaeota	0.50509	0.0432377	1802	99.7333	0.307692	H	1802	188	0.999041	879.841	125	1092	8787	1797	1092	0	879.841	216.626	23.7077	X
DTU593	2219205	5361	p__Euryarchaeota	0.440826	0.0351329	2530	98.2026	0.653595	H	2530	228	0.997346	877.156	153	1137	5361	2505	1137	0	877.156	1738.35	139.04	X
DTU608	1889688	4725	p__Euryarchaeota	0.604245	0.0400901	2208	98.8889	0	H	2208	234	0.998055	855.837	153	1095	4725	2197	1095	0	855.837	786.57	945.532	X
DTU624	1681488	7965	p__Euryarchaeota	0.42171	0.0405031	1990	98.9333	0	H	1990	188	0.998931	844.969	125	1056	7965	1982	1056	0	844.969	35.7704	71.3669
DTU639	1809834	9096	p__Euryarchaeota	0.586606	0.0529895	2151	99.1935	0.248139	H	2151	187	0.997282	841.392	124	1065	9096	2139	1065	0	841.392	41.6737	41.86
DTU573	2828082	19929	p__Firmicutes	0.57684	0.0207452	2835	92.6471	2.45098	H	2835	176	0.997881	997.56	102	1257	19929	2808	1257	0	997.56	33.8126	20.8247
DTU574	1563513	3903	p__Firmicutes	0.536743	0.0198239	1634	90.264	0.990099	H	1634	175	0.998085	956.862	101	1188	3903	1622	1188	0	956.862	42.6322	25.3781
DTU578	2126802	13068	p__Firmicutes	0.60638	0.0226697	2238	86.3036	0	M	2238	175	0.998739	950.314	101	1191	13068	2228	1191	0	950.314	9.74705	24.3496
DTU579	2902872	7878	p__Firmicutes	0.62153	0.0360605	3158	88.2353	1.47059	M	3158	176	0.993443	919.212	102	1182	7878	3092	1182	0	919.212	21.9726	26.2949
DTU580	2053599	4614	p__Firmicutes	0.576091	0.0209837	2199	89.1089	0	M	2199	175	0.997882	933.879	101	1182	4614	2184	1182	0	933.879	38.8516	25.6509
DTU584	2355900	5934	p__Firmicutes	0.540458	0.0236926	2533	88.1188	0.990099	M	2533	175	0.997938	930.083	101	1182	5934	2514	1182	0	930.083	11.6281	18.5702
DTU589	1484448	4962	p__Firmicutes	0.646231	0.0323564	1853	85.5429	2.25126	M	1853	293	0.996479	801.105	157	1038	4962	1837	1038	0	801.105	9.26641	17.4672
DTU596	2168466	5523	p__Firmicutes	0.53685	0.0175407	2317	92.1569	1.0142	H	2317	176	0.998164	935.894	102	1197	5523	2299	1197	0	935.894	9.94306	10.5702
DTU599	1671417	7107	p__Firmicutes	0.500046	0.0175308	1762	89.2157	2.94118	M	1762	176	0.998399	948.591	102	1173	7107	1751	1173	0	948.591	186.096	65.3318	X
DTU600	997467	4410	p__Firmicutes	0.564312	0.0988313	1180	31.2468	1.27119	L	1180	213	0.995025	845.311	118	1101	4410	1164	1101	0	845.311	39.7757	56.7365
DTU602	1665891	4686	p__Firmicutes	0.561607	0.0493025	1959	79.1217	0.875706	M	1959	213	0.997509	850.378	118	1101	4686	1940	1101	0	850.378	8.77137	64.2412
DTU607	1535589	4137	p__Firmicutes	0.5754	0.0480434	1687	89.5256	0.384615	M	1687	245	0.997411	910.248	130	1122	4137	1673	1122	0	910.248	9.90166	60.1189
DTU615	2018271	3855	p__Firmicutes	0.462956	0.0429748	2436	91.2461	3.48101	H	2436	295	0.998491	828.518	158	1050	3855	2419	1050	0	828.518	10.234	17.2605
DTU616	2115291	5451	p__Firmicutes	0.551345	0.0509899	2378	89.7059	1.06952	M	2378	176	0.996383	889.525	102	1110	5451	2350	1110	0	889.525	11.2861	15.3384
DTU617	2429445	5586	p__Firmicutes	0.42861	0.044085	2818	96.1538	1.68269	H	2818	179	0.998087	862.117	104	1122	5586	2793	1122	0	862.117	19.5994	20.4735
DTU619	1947018	4434	p__Firmicutes	0.638694	0.0262519	1966	95.098	2.45098	H	1966	176	0.99873	990.345	102	1197	4434	1957	1197	0	990.345	191.84	103.256	X
DTU626	2611632	9069	p__Firmicutes	0.527472	0.0531638	2820	97.0588	12.5	L	2820	176	0.998395	926.111	102	1137	9069	2798	1137	0	926.111	34.6828	43.0845
DTU628	3159624	16242	p__Firmicutes	0.578436	0.0373868	3075	93.1373	3.04516	H	3075	176	0.997262	1027.52	102	1248	16242	3045	1248	0	1027.52	95.5024	119.383	X
DTU629	2107053	6585	p__Firmicutes	0.543114	0.0245124	2141	94.2308	1.44231	H	2141	179	0.999235	984.144	104	1230	6585	2133	1230	0	984.144	13.8043	10.559
DTU635	1854618	4983	p__Firmicutes	0.494946	0.0244119	2095	90.4891	0.980392	H	2095	176	0.999042	885.259	102	1104	4983	2089	1104	0	885.259	8.30683	13.1431
DTU640	2128341	8661	p__Firmicutes	0.549926	0.0250467	2248	92.1569	2.45098	H	2248	176	0.996442	946.771	102	1185	8661	2215	1185	0	946.771	29.3275	19.3003
DTU645	1966011	4236	p__Firmicutes	0.599471	0.0253368	2114	88.0791	1.9774	M	2114	213	0.998618	929.996	118	1122	4236	2104	1122	0	929.996	815.635	694.079	X
DTU572	194211	2904	root	0.564587	0.0216649	205	0	0	L	205	56	0.9981	947.371	24	1101	2904	203	1101	0	947.371	47.4354	46.867
DTU575	507078	4794	root	0.410118	0.0502879	616	0	0	L	616	56	0.999397	823.179	24	1026	4794	614	1026	0	823.179	11.1274	13.8164
DTU601	391632	4245	root	0.496892	0.0314313	516	0	0	L	516	56	0.995519	758.977	24	987	4245	511	987	0	758.977	6.44692	55.5335
DTU622	184431	2637	root	0.463067	0.0284999	227	8.33333	0	L	227	56	0.998943	812.471	24	1038	2637	226	1038	0	812.471	74.8482	45.7096
DTU627	331980	3276	root	0.374435	0.0288242	439	4.16667	0	L	439	56	0.999494	756.219	24	1008	3276	438	1008	0	756.219	4.75826	11.2338
