# Supplementary material for: Metabolic dependencies govern microbial syntrophies during methanogenesis in an anaerobic digestion ecosystem
Source: Microbiome. 2020 Feb 15;8:22. doi: 10.1186/s40168-019-0780-9 (PMC7024554; doi:10.1186/s40168-019-0780-9)
Supplement: Supplementary file 14 — Additional file 13. Gene expression profile of Coprothermobacter proteolyticus DTU632. [file 40168_2019_780_MOESM13_ESM.xlsx]

## Sheet: bin73.rpkm
Gene expression profile of DTU632
IMG-ID	Annotation	ID	Point 1-1	Point 1-2	Point 1-3	Point2-1	Point 2-2	Point 2-3	Point 3-1	Point 3-2	Point 3-3
Ga0214976_100011610	LAO/AO transport system kinase	KO:K07588	34.1585	19.1259	15.0438	20.9786	17.0005	0.494626	1.51518	7.40161	2.36577
Ga0214976_1000116100	S-DNA-T family DNA segregation ATPase FtsK/SpoIIIE	KO:K03466	70.4054	43.4272	64.0389	54.4186	28.3339	4.93773	1.22228	17.9123	5.04371
Ga0214976_1000116101	thiamine pyrophosphokinase	KO:K00949	70.7575	43.8814	54.7672	48.4649	38.4979	4.42076	2.57944	21.8085	3.23636
Ga0214976_1000116102	large subunit ribosomal protein L28	KO:K02902	259.826	139.626	213.298	195.564	135.361	17.9939	7.34941	59.3758	18.8521
Ga0214976_1000116103	exodeoxyribonuclease VII small subunit	KO:K03602	59.0297	33.7353	34.633	33.9579	23.538	4.27012	8.7204	14.7458	1.45884
Ga0214976_1000116104	geranylgeranyl diphosphate synthase type II	KO:K13789	40.0673	25.6594	32.1393	31.4284	11.0798	3.10641	1.05731	11.6211	1.23815
Ga0214976_1000116105	1-deoxy-D-xylulose-5-phosphate synthase	KO:K01662	29.7587	19.1282	27.7698	23.7953	11.7391	1.30185	1.51922	6.27958	1.18603
Ga0214976_1000116106	23S rRNA (cytidine1920-2'-O)/16S rRNA (cytidine1409-2'-O)-methyltransferase	KO:K06442	44.9274	22.1852	33.9927	29.347	16.9151	1.44908	2.95929	11.0088	2.17826
Ga0214976_1000116107	NAD+ kinase	KO:K00858	33.7933	20.2381	31.2544	24.7323	16.1577	2.91565	4.33041	9.76333	2.1733
Ga0214976_1000116108	DNA repair protein RecN (Recombination protein N)	KO:K03631	40.7949	28.5493	40.7917	29.5105	19.9534	2.02792	0.856843	9.4982	1.52897
Ga0214976_1000116109	large subunit ribosomal protein L21	KO:K02888	690.437	431.767	498.462	517.294	372.974	45.2103	45.4072	169.772	49.6283
Ga0214976_100011611	uracil phosphoribosyltransferase	KO:K00761	55.4259	33.4367	42.2209	42.1766	21.1866	2.54572	0.866476	10.2562	3.33392
Ga0214976_1000116110	hypothetical protein	KO:K07584	279.965	122.447	175.097	152.108	118.033	12.8518	1.41869	77.5656	6.64533
Ga0214976_1000116111	large subunit ribosomal protein L27	KO:K02899	255.837	138.199	165.255	152.319	136.102	15.2327	8.64113	62.3433	17.3469
Ga0214976_1000116112	GTP-binding protein	KO:K03979	81.6382	48.083	64.8982	52.0452	62.8444	5.58388	4.04635	19.6972	3.07688
Ga0214976_1000116113	nicotinate-nucleotide adenylyltransferase	KO:K00969	332.057	202.261	340.109	238.639	104.083	10.5783	3.72462	53.7442	20.1882
Ga0214976_1000116114	anionic cell wall polymer biosynthesis LytR-Cps2A-Psr (LCP) family protein	COG1316	50.3089	27.6412	50.0682	29.6247	28.5682	3.06925	1.10612	7.8972	2.34387
Ga0214976_100011612	UDP-GlcNAc:undecaprenyl-phosphate GlcNAc-1-phosphate transferase	KO:K02851	58.2779	27.1532	40.5461	43.6764	13.2907	1.07866	2.20284	8.38099	3.86938
Ga0214976_100011613	UDP-N-acetylglucosamine 2-epimerase (non-hydrolysing)	KO:K01791	33.5674	27.2052	30.0664	31.9916	15.7598	1.95651	0.841172	3.79301	2.53295
Ga0214976_100011614	UDP-N-acetylglucosamine 1-carboxyvinyltransferase	KO:K00790	46.5175	29.7353	41.932	35.8232	19.5788	2.15649	1.10099	7.86061	1.47348
Ga0214976_100011615	histidinol-phosphate aminotransferase	KO:K00817	58.2211	27.2672	40.193	35.7125	26.1286	1.88863	2.99985	10.6283	2.7243
Ga0214976_100011616	hypothetical protein	Hypo-rule applied	24.8487	18.0211	25.0928	22.7202	17.2685	1.10952	1.13293	5.74716	2.27433
Ga0214976_100011617	DNA polymerase	KO:K02334	37.1692	26.1329	29.6984	27.3642	22.2359	1.27669	6.70432	8.39753	2.24313
Ga0214976_100011618	undecaprenyl diphosphate synthase	KO:K00806	34.2591	17.3895	25.4337	19.7409	15.4042	1.12348	1.31107	4.80339	0.877315
Ga0214976_100011619	phosphatidate cytidylyltransferase	KO:K00981	31.8411	13.7662	23.4152	19.4367	13.532	1.73889	1.18372	3.66961	0.792096
Ga0214976_100011620	1-deoxy-D-xylulose-5-phosphate reductoisomerase	KO:K00099	109.931	66.5203	95.0723	76.0811	27.6989	3.79221	1.6304	16.3118	3.54575
Ga0214976_100011621	regulator of sigma E protease	KO:K11749	33.0012	22.2447	38.3632	31.4103	14.2624	2.58081	0.91661	5.94144	2.60677
Ga0214976_100011622	(E)-4-hydroxy-3-methylbut-2-enyl-diphosphate synthase	KO:K03526	24.9812	17.2933	24.0136	19.3445	8.65697	1.89114	0.454361	4.86591	1.67222
Ga0214976_100011623	elongation factor P	KO:K02356	136.472	73.5893	89.8392	100.87	71.6935	5.2072	4.09004	37.3466	1.91582
Ga0214976_100011624	hypothetical protein	Hypo-rule applied	84.6908	49.2509	54.5331	41.5167	35.0478	2.48163	2.25243	16.5045	1.50723
Ga0214976_100011625	uncharacterized alkaline shock family protein YloU	COG1302	252.408	188.307	212.065	193.39	111.468	10.6221	2.95806	68.3598	13.1961
Ga0214976_100011626	hypothetical protein	Hypo-rule applied	159.374	101.53	125.061	119.104	57.0706	6.6003	3.9938	31.5155	5.67904
Ga0214976_100011627	N utilization substance protein B	KO:K03625	149.687	112.44	138.172	131.109	58.3778	7.67214	3.1336	25.905	9.78543
Ga0214976_100011628	exodeoxyribonuclease VII large subunit	KO:K03601	65.1835	55.7032	66.527	62.5333	29.6017	3.55443	2.6743	9.69024	3.83472
Ga0214976_100011629	methylthioribose-1-phosphate isomerase	KO:K08963	17.1648	12.0011	16.3671	10.8238	8.5064	0.42313	0	2.67881	0.57823
Ga0214976_10001163	trigger factor	KO:K03545	34.6007	23.1958	27.3769	24.5477	18.6442	2.57235	3.70816	9.23128	1.55084
Ga0214976_100011630	adenosylhomocysteinase	KO:K01251	29.1813	21.5175	29.2369	24.3984	10.4334	1.12245	0	4.73745	1.40607
Ga0214976_100011631	5-methylthioadenosine/S-adenosylhomocysteine deaminase	KO:K12960	43.7254	30.3384	43.808	37.2269	14.0285	2.18067	3.20642	7.6308	2.62241
Ga0214976_100011632	alanyl-tRNA synthetase	KO:K01872	74.5073	49.3615	73.6128	57.7908	34.6168	4.18406	2.51842	20.3801	4.27326
Ga0214976_100011633	putative Holliday junction resolvase	KO:K07447	32.111	14.7351	20.4072	18.0522	11.1277	2.1449	2.19015	4.32067	1.46556
Ga0214976_100011634	tRNA dimethylallyltransferase	KO:K00791	14.5188	6.68937	8.96061	5.35595	3.47305	0.852014	0.497136	2.80211	0.166332
Ga0214976_100011635	4-hydroxy-3-methylbut-2-enyl diphosphate reductase	KO:K03527	67.7974	39.3178	58.3906	47.7674	30.4376	3.21284	2.28217	12.5419	5.15409
Ga0214976_100011636	small subunit ribosomal protein S1	KO:K02945	164.899	94.6749	131.056	113.39	90.5908	7.62777	7.9414	39.0804	6.84697
Ga0214976_100011637	peptide deformylase	KO:K01462	32.8683	13.7036	24.9292	19.671	19.9328	1.75639	0	8.59242	1.2001
Ga0214976_100011638	methionyl-tRNA formyltransferase	KO:K00604	48.1407	27.7493	32.9206	28.9647	27.44	2.11565	0.508302	8.59512	3.57142
Ga0214976_100011639	hypothetical protein	Hypo-rule applied	36.0359	16.8923	22.0201	22.3862	13.796	0.966987	0.658258	5.19438	0.22024
Ga0214976_10001164	ATP-dependent Clp protease protease subunit	KO:K01358	83.6108	64.1716	72.5961	56.4604	54.8325	9.05923	4.93352	14.3673	4.67686
Ga0214976_100011640	2-oxoglutarate ferredoxin oxidoreductase subunit delta	KO:K00176	46.0009	31.2316	38.4928	29.267	12.6352	2.16485	0	3.73788	8.13556
Ga0214976_100011641	2-oxoglutarate ferredoxin oxidoreductase subunit alpha	KO:K00174	56.9887	34.6573	42.4219	47.0962	17.3537	1.53539	4.47938	6.81696	1.49871
Ga0214976_100011642	2-oxoglutarate ferredoxin oxidoreductase subunit beta	KO:K00175	87.4301	56.0688	88.8154	73.3973	27.6246	3.44541	1.27931	16.2243	4.06629
Ga0214976_100011643	2-oxoglutarate ferredoxin oxidoreductase subunit gamma	KO:K00177	99.9455	72.2704	104.875	88.5696	42.042	3.94796	4.24341	22.4829	3.69138
Ga0214976_100011644	ADP-ribose pyrophosphatase	KO:K01515	154.69	114.197	162.605	124.974	55.1331	6.01126	2.6306	25.2065	5.28088
Ga0214976_100011645	integrase/recombinase XerD	KO:K04763	29.0442	15.4487	18.1082	18.5071	15.9399	1.04594	1.60201	3.31089	3.216
Ga0214976_100011646	phosphopentomutase	KO:K01839	46.0735	35.1014	36.1735	37.5644	24.0747	3.19344	1.2228	15.6226	2.59113
Ga0214976_100011647	purine-nucleoside phosphorylase	KO:K03783	32.1401	18.2826	25.808	21.7818	12.0444	0.984916	0.574682	8.42191	1.92277
Ga0214976_100011648	molybdopterin/thiamine biosynthesis adenylyltransferase	COG0476	60.9667	42.018	56.3575	43.316	35.7442	3.47969	1.70549	15.7012	3.61394
Ga0214976_100011649	RNA polymerase sporulation-specific sigma factor	KO:K03091	23.7522	12.9031	18.2613	16.7899	13.6917	1.1996	1.95984	7.73266	0.983587
Ga0214976_10001165	ATP-dependent Clp protease ATP-binding subunit ClpX	KO:K03544	88.9998	55.2205	77.4057	64.5752	43.5233	7.61832	4.07473	21.9233	5.32936
Ga0214976_100011651	DNA-binding NarL/FixJ family response regulator	COG2197	264.019	150.434	240.703	155.001	75.46	11.3761	1.99132	49.3859	10.6601
Ga0214976_100011652	cysteinyl-tRNA synthetase	KO:K01883	114.88	64.5161	87.5138	78.6648	54.3779	5.32263	7.35803	30.7281	5.70702
Ga0214976_100011653	excinuclease ABC subunit C	KO:K03703	70.6713	51.1626	63.9279	60.7295	24.68	4.15305	1.85047	12.69	3.30203
Ga0214976_100011654	diaminohydroxyphosphoribosylaminopyrimidine deaminase/5-amino-6-(5-phosphoribosylamino)uracil reductase	KO:K11752	72.8825	51.1218	67.4725	61.8599	26.0064	3.62628	1.74248	14.9778	3.7895
Ga0214976_100011655	riboflavin synthase	KO:K00793	53.6244	37.2533	43.2699	42.6001	18.865	2.66069	1.44897	15.5175	1.93919
Ga0214976_100011656	3,4-dihydroxy 2-butanone 4-phosphate synthase/GTP cyclohydrolase II	KO:K14652	56.7022	34.1934	45.8125	43.7965	23.8099	2.1991	1.56208	13.6472	2.74386
Ga0214976_100011657	6,7-dimethyl-8-ribityllumazine synthase	KO:K00794	72.7893	35.5383	37.407	40.0798	25.2045	4.02879	3.87179	10.3661	2.9147
Ga0214976_100011658	seryl-tRNA synthetase	KO:K01875	85.4328	54.7789	66.641	63.4735	24.2887	2.72721	3.71298	12.1384	5.34185
Ga0214976_100011659	hypothetical protein	Hypo-rule applied	459.709	157.509	305.866	146.198	86.5517	9.95376	8.01647	54.8673	8.81278
Ga0214976_10001166	valyl-tRNA synthetase	KO:K01873	185.993	105.407	194.615	127.893	74.8373	11.7408	5.70457	42.1014	10.4975
Ga0214976_100011660	N-acetylglucosaminyldiphosphoundecaprenol N-acetyl-beta-D-mannosaminyltransferase	KO:K05946	121.579	84.1803	111.438	96.2469	47.6032	5.9132	4.99691	28.3216	7.33764
Ga0214976_100011661	CBS domain-containing protein	COG0517	76.9038	50.4042	44.1209	54.9096	42.2836	3.00933	4.09709	20.2066	2.74161
Ga0214976_100011662	hypothetical protein	Hypo-rule applied	41.8671	27.1744	38.4574	37.3986	24.797	3.29634	0	15.9363	3.6037
Ga0214976_100011663	V/A-type H+-transporting ATPase subunit I	KO:K02123	66.414	33.4438	50.3898	38.9623	22.0206	3.5169	1.73363	13.5406	3.81168
Ga0214976_100011664	V/A-type H+-transporting ATPase subunit K	KO:K02124	79.3937	27.2397	41.2932	31.1281	19.3842	3.20259	4.3602	8.6017	0
Ga0214976_100011665	vacuolar-type H+-ATPase subunit E/Vma4	COG1390	145.958	90.1615	103.132	76.1284	60.2692	5.14197	3.11137	37.2666	5.98577
Ga0214976_100011666	V/A-type H+-transporting ATPase subunit C	KO:K02119	33.9225	16.5184	23.452	22.1895	12.225	0.561045	0.91661	6.19976	0.613359
Ga0214976_100011667	vacuolar-type H+-ATPase subunit F/Vma7	COG1436	17.4261	10.3454	18.2123	7.73815	6.31024	0	0	2.80015	0.554053
Ga0214976_100011668	V/A-type H+-transporting ATPase subunit A	KO:K02117	36.622	21.8791	34.1944	30.2142	16.464	1.65285	1.35018	6.24042	1.26488
Ga0214976_100011669	V/A-type H+-transporting ATPase subunit B	KO:K02118	39.6689	26.7695	37.7315	30.7581	14.4747	1.96944	1.67582	4.53396	2.24278
Ga0214976_10001167	dihydrofolate synthase/folylpolyglutamate synthase	KO:K11754	70.3043	38.2435	59.9845	44.8493	33.7091	3.22753	2.77525	13.4918	2.43743
Ga0214976_100011670	V/A-type H+-transporting ATPase subunit D	KO:K02120	74.3272	20.7233	49.2865	22.2716	22.6621	4.83288	0	23.9638	2.54015
Ga0214976_100011671	hypothetical protein	KO:K09747	42.5106	20.0216	21.6846	27.0396	15.68	0.75559	3.08612	23.4831	3.09766
Ga0214976_100011672	recombinational DNA repair protein RecR	COG0353	50.7296	19.9891	31.0622	30.2952	19.5682	1.50873	0	9.55169	3.60808
Ga0214976_100011673	uncharacterized protein YacL	COG4956	37.7461	24.1805	25.512	27.9911	19.0664	1.96695	0.845662	9.77147	3.81971
Ga0214976_100011674	2-C-methyl-D-erythritol 4-phosphate cytidylyltransferase/2-C-methyl-D-erythritol 2,4-cyclodiphosphate synthase	KO:K12506	57.1387	44.4505	52.6474	46.4491	29.423	5.08467	1.59752	14.182	3.87511
Ga0214976_100011675	rare lipoprotein A	KO:K03642	63.6027	45.6148	55.3889	48.0198	21.1669	3.10078	1.33313	13.9013	4.23738
Ga0214976_100011676	nondiscriminating glutamyl-tRNA synthetase	KO:K09698	31.9386	18.507	26.2427	23.6693	11.0192	1.41599	1.36081	6.32791	1.3659
Ga0214976_100011677	IMP dehydrogenase	KO:K00088	54.98	37.8138	51.5673	42.6542	25.6798	2.90706	5.1345	12.8424	4.61686
Ga0214976_100011678	CspA family cold shock protein	KO:K03704	1360.07	226.539	339.765	370.455	900.923	28.3519	96.4999	405.222	37.9372
Ga0214976_100011679	hydrogenase maturation protein HypF	KO:K04656	54.2086	31.6564	42.5187	35.6136	25.3311	2.31283	1.67937	8.40087	2.66895
Ga0214976_10001168	predicted dehydrogenase	COG0673	153.867	110.063	90.3598	109.221	102.546	5.7651	4.80548	41.7126	7.39597
Ga0214976_100011680	cob(I)alamin adenosyltransferase	KO:K19221	47.7121	30.4238	40.2703	31.4271	26.1974	1.97594	1.79344	8.59242	3.30028
Ga0214976_100011681	Ca2+-transporting ATPase	KO:K01537	69.2366	47.4488	66.5725	54.9538	27.4078	4.28099	1.67411	14.0494	3.98311
Ga0214976_100011682	tRNA-specific 2-thiouridylase	KO:K00566	63.7549	32.6396	42.2377	31.1255	20.3056	2.11565	1.29617	9.25408	1.44558
Ga0214976_100011683	predicted ATP-dependent protease	COG1067	71.2174	39.786	68.6497	47.6504	27.5513	2.97393	4.04889	14.2363	5.41871
Ga0214976_100011684	endonuclease-3	KO:K10773	47.1971	32.6631	46.493	42.1871	22.9349	1.42096	0.64486	10.1773	2.80485
Ga0214976_100011685	uncharacterized protein (DUF362 family)/ferredoxin	COG2006,COG1145	65.4209	35.8649	48.1227	39.6003	24.7799	2.439	1.24523	12.6337	3.05528
Ga0214976_100011686	uncharacterized protein YerC	COG4496	3417.73	878.032	571.198	859.101	1300.53	44.8981	155.874	881.166	129.358
Ga0214976_100011687	histidinol-phosphate aminotransferase	KO:K00817	604.022	274.33	318.076	288.331	189.251	3.59879	3.56335	96.6582	9.23976
Ga0214976_100011688	lipid-binding SYLF domain-containing protein	COG2930	221.49	135.733	157.93	154.358	87.4087	11.4535	8.8137	65.7284	13.1566
Ga0214976_10001169	hypothetical protein	Hypo-rule applied	33.8315	19.7202	27.0332	23.0037	11.5795	1.54751	0.486202	7.12523	1.13871
Ga0214976_100011692	tRNA(Ile)-lysidine synthase	KO:K04075	50.2007	34.8232	49.8871	38.2859	17.7172	3.58161	1.70101	11.1218	1.59355
Ga0214976_100011693	hypoxanthine phosphoribosyltransferase	KO:K00760	232.745	86.3296	160.768	97.8297	76.5862	14.9793	7.09346	93.9584	9.19666
Ga0214976_100011694	cell division protease FtsH	KO:K03798	59.0436	37.5841	45.1591	42.5672	40.7081	2.85884	4.96876	18.9043	3.98988
Ga0214976_100011695	excinuclease ABC subunit B	KO:K03702	36.5096	23.0877	32.783	25.054	16.7026	1.55224	2.11332	6.88233	1.80697
Ga0214976_100011696	excinuclease ABC subunit A	KO:K03701	37.2781	21.81	34.1764	25.9794	18.0679	2.29444	1.33877	8.96082	1.84769
Ga0214976_100011697	23S rRNA (guanosine2251-2'-O)-methyltransferase	KO:K03218	37.4387	18.9544	31.9947	23.3723	17.8926	2.24924	3.06226	9.32061	1.63931
Ga0214976_100011698	uncharacterized protein DUF4911	pfam16256	41.0562	20.5089	32.5942	26.1869	19.712	1.89977	0	8.74715	0.649034
Ga0214976_100011699	TldD protein	KO:K03568	90.4299	62.0884	78.3442	67.615	42.2664	5.88629	3.48433	19.8358	5.82893
Ga0214976_10001631	small subunit ribosomal protein S15	KO:K02956	232.342	98.7365	116.433	113.652	92.8738	8.05575	18.2793	47.3944	14.0666
Ga0214976_100016310	DeoR/GlpR family transcriptional regulator of sugar metabolism/acyl-CoA thioesterase FadM	COG1349,COG0824	63.0448	41.4015	94.1441	52.0988	52.262	4.52286	3.35874	18.9315	3.09036
Ga0214976_1000163100	Holliday junction DNA helicase RuvA	KO:K03550	35.0743	15.1752	20.0979	21.633	21.2706	1.56189	3.18968	10.3377	1.86761
Ga0214976_1000163101	Holliday junction DNA helicase RuvB	KO:K03551	48.1974	32.1509	36.5075	34.2262	24.9598	3.02091	0.913966	11.0759	3.82243
Ga0214976_1000163102	stage II sporulation protein D	KO:K06381	65.1011	44.4941	72.3869	42.8454	20.8765	3.018	4.10889	17.7558	3.20776
Ga0214976_100016311	glycerol-3-phosphate acyltransferase PlsX	KO:K03621	32.6724	23.3186	37.6397	27.9178	31.9631	2.44114	2.84872	11.775	3.81251
Ga0214976_100016312	3-oxoacyl-[acyl-carrier-protein] synthase-3	KO:K00648	16.6668	10.573	13.239	13.9699	14.5173	0.816158	0	5.36836	0
Ga0214976_100016313	enoyl-[acyl-carrier protein] reductase II	KO:K02371	38.3249	34.9758	35.6906	34.0716	41.0452	2.31261	1.49141	14.8512	0.997991
Ga0214976_100016314	[acyl-carrier-protein] S-malonyltransferase	KO:K00645	39.5659	23.7261	30.3944	26.6051	28.5053	1.95359	2.49351	10.1193	2.50283
Ga0214976_100016315	3-oxoacyl-[acyl-carrier protein] reductase	KO:K00059	111.56	70.4164	87.9717	81.537	57.4548	6.08321	5.73372	27.2909	6.39463
Ga0214976_100016316	acyl carrier protein	KO:K02078	851.421	449.327	482.142	567.993	458.171	40.7958	60.5912	240.133	47.5139
Ga0214976_100016317	3-oxoacyl-[acyl-carrier-protein] synthase II	KO:K09458	227.183	153.899	162.726	164.491	89.9668	10.715	9.59738	37.0014	13.4866
Ga0214976_100016318	hypothetical protein	Hypo-rule applied	8.70104	2.65232	0.468362	6.36802	11.6841	0.750715	0	1.72827	0
Ga0214976_100016319	pyrimidine operon attenuation protein/uracil phosphoribosyltransferase	KO:K02825	49.4176	24.0682	28.6883	29.8723	50.96	2.15883	0	16.4009	4.13021
Ga0214976_10001632	polyribonucleotide nucleotidyltransferase	KO:K00962	309.97	201.086	253.48	244.67	144.987	16.3526	14.6036	85.9448	27.7357
Ga0214976_100016320	aspartate carbamoyltransferase catalytic subunit	KO:K00609	31.6357	19.8155	25.7876	24.5034	20.4692	1.12728	1.02317	8.07393	2.05399
Ga0214976_100016321	dihydroorotase	KO:K01465	57.2214	33.3633	44.951	40.3124	40.4599	3.63351	3.61967	18.158	4.35985
Ga0214976_100016322	dihydroorotate dehydrogenase electron transfer subunit	KO:K02823	54.0942	20.1316	35.3625	26.8702	28.7837	1.4995	0.612451	11.3919	2.04914
Ga0214976_100016323	dihydroorotate dehydrogenase (NAD+) catalytic subunit	KO:K17828	34.0715	23.2722	27.7394	27.2086	29.2308	2.20473	2.0011	7.33149	1.84121
Ga0214976_100016324	orotidine-5'-phosphate decarboxylase	KO:K01591	33.7992	22.8394	21.8856	23.2246	31.5156	1.19783	1.39783	9.45464	0.701529
Ga0214976_100016325	orotate phosphoribosyltransferase	KO:K00762	55.1303	30.4263	33.9865	36.9504	32.7296	1.40194	0	20.7481	4.37902
Ga0214976_100016326	hypothetical protein	Hypo-rule applied	73.7549	48.2788	68.707	62.3099	32.0031	3.63628	1.06085	17.9385	4.25928
Ga0214976_100016327	selenide,water dikinase	KO:K01008	90.4159	68.6722	86.8706	76.7316	43.0715	6.1449	2.67001	23.7782	7.14666
Ga0214976_100016328	BirA family biotin operon repressor/biotin-[acetyl-CoA-carboxylase] ligase	KO:K03524	55.7614	28.7325	40.1655	32.6269	24.7981	1.64309	3.66056	15.1307	2.85775
Ga0214976_100016329	peptide chain release factor 2	KO:K02836	62.4449	31.3916	36.9377	38.6583	22.9372	2.17856	2.61708	12.981	4.02787
Ga0214976_10001633	dUTP pyrophosphatase	KO:K01520	215.204	174.833	252.962	201.449	108.182	15.961	11.5661	55.7098	15.831
Ga0214976_100016330	SpoIVB peptidase S55	pfam05580	45.5208	26.7514	27.9468	31.1415	24.3997	2.69689	2.14929	12.8716	3.236
Ga0214976_100016331	phospholipid/cholesterol/gamma-HCH transport system permease protein	KO:K02066	47.2493	30.6676	42.7749	37.22	24.7981	2.83807	1.83028	14.7868	4.28662
Ga0214976_100016332	phospholipid/cholesterol/gamma-HCH transport system ATP-binding protein	KO:K02065	85.5002	58.6618	77.3286	69.1703	30.6956	3.3376	0.619638	18.86	5.39028
Ga0214976_100016333	phospholipid/cholesterol/gamma-HCH transport system substrate-binding protein	KO:K02067	267.305	75.3147	180.29	120.389	122.643	17.4413	17.46	126.953	25.8207
Ga0214976_100016334	dTMP kinase	KO:K00943	24.1091	17.019	18.5003	21.8901	14.1183	1.50143	0	4.32067	2.56473
Ga0214976_100016335	hypothetical protein	KO:K09770	61.9808	29.2679	39.5375	26.5395	26.2469	1.8639	0	9.19501	0.727749
Ga0214976_100016336	DNA polymerase-3 subunit delta'	KO:K02341	46.7059	27.7421	38.5786	35.9321	16.9884	3.04609	0.622071	5.96071	3.33012
Ga0214976_100016337	cell fate regulator YaaT (PSP1 superfamily)	COG1774	55.2516	34.3975	44.6537	44.6147	20.8165	3.14489	1.32878	9.48694	1.77834
Ga0214976_100016338	fused signal recognition particle receptor	KO:K03110	42.7298	27.5872	31.9296	31.0476	22.7866	1.27309	3.11988	7.91334	2.0877
Ga0214976_100016339	hypothetical protein	Hypo-rule applied	79.3084	30.7022	60.9115	47.1641	23.3915	3.98852	1.41658	18.7637	3.08073
Ga0214976_10001634	16S rRNA (guanine966-N2)-methyltransferase	KO:K08316	324.616	198.242	354.516	228.108	118.708	18.397	16.9066	60.3527	17.9126
Ga0214976_100016340	uncharacterized protein DUF4416	pfam14385	29.384	19.3525	19.1188	22.0154	6.91236	2.22063	0	4.60102	3.64152
Ga0214976_100016341	adenylosuccinate lyase	KO:K01756	53.4913	37.9535	45.5063	42.8817	21.0749	1.6249	1.10612	5.61117	1.72706
Ga0214976_100016342	fructose-1,6-bisphosphatase II	KO:K02446	21.8377	14.6939	15.8101	15.592	12.6646	0.813712	2.84872	5.61989	1.7474
Ga0214976_100016343	formate--tetrahydrofolate ligase	KO:K01938	109.591	77.7389	106.651	91.7397	41.4645	4.53716	2.851	22.0154	5.53255
Ga0214976_100016344	hypothetical protein	KO:K07080	1071.88	722.388	973.54	905.216	411.628	61.0141	40.8775	225.687	96.3966
Ga0214976_100016345	hut operon positive regulator	KO:K09683	102.132	39.6474	42.0071	55.8207	46.3016	4.29292	2.76852	26.5281	5.86651
Ga0214976_100016346	large subunit ribosomal protein L31	KO:K02909	455.662	266.129	341.202	320.521	198.164	28.3313	12.3981	89.682	44.2472
Ga0214976_100016347	thymidylate synthase (FAD)	KO:K03465	174.785	118.267	153.784	137.326	68.6365	7.27255	4.42398	41.3221	11.4185
Ga0214976_100016348	peptide chain release factor 1	KO:K02835	127.012	89.1926	120.836	91.3314	80.5093	7.35366	3.53355	35.1034	9.90138
Ga0214976_100016349	release factor glutamine methyltransferase	KO:K02493	146.539	77.1298	111.019	90.296	68.2144	7.63022	8.90421	35.4457	8.19272
Ga0214976_10001635	pantetheine-phosphate adenylyltransferase	KO:K00954	272.388	182.343	265.693	207.812	85.4496	10.9014	15.4872	49.1025	18.1359
Ga0214976_100016350	thioredoxin reductase (NADPH)	KO:K00384	190.63	109.202	161.936	139.079	83.2307	9.1108	6.47165	33.2857	7.44317
Ga0214976_100016351	1-phosphofructokinase/tagatose 6-phosphate kinase	KO:K00882,KO:K00917	36.3784	20.8199	29.7262	26.5593	18.4281	1.95976	0.500276	5.92159	3.18027
Ga0214976_100016352	protein-tyrosine phosphatase/ribose 5-phosphate isomerase B	KO:K01104,KO:K01808	48.0661	23.492	33.5757	35.9125	24.255	3.74017	1.69736	11.4806	0.851857
Ga0214976_100016353	flagellar protein FliS	KO:K02422	35.5565	17.079	21.6825	26.3412	21.3692	1.28718	1.05146	10.6678	5.62879
Ga0214976_100016354	hypothetical protein	Hypo-rule applied	33.1735	14.2986	22.8769	17.3666	14.5847	0.977822	0.99845	7.87886	1.00218
Ga0214976_100016355	predicted Zn-dependent protease	COG4783	42.2831	26.9514	33.1726	30.664	19.7879	1.48013	1.39509	13.1057	1.24472
Ga0214976_100016356	DNA polymerase-3 subunit gamma/tau	KO:K02343	20.8542	13.2235	15.8578	14.526	12.0523	0.888251	0.558147	6.13469	2.33431
Ga0214976_100016357	DNA polymerase-3 subunit alpha	KO:K02337	37.375	25.1615	32.8416	28.8659	20.8714	1.43192	0.835503	7.92734	1.4443
Ga0214976_100016358	pyruvate kinase	KO:K00873	42.3347	26.04	35.2807	33.6461	20.1339	1.56539	0.799208	9.30978	2.22832
Ga0214976_100016359	8-oxo-dGTP pyrophosphatase MutT (NUDIX family)	COG0494	35.1737	21.3758	29.5361	30.983	19.7928	2.08097	1.41658	11.1784	2.60677
Ga0214976_10001636	predicted nucleotidyltransferase	COG1323	114.249	75.5516	115.625	97.3358	37.9798	5.29788	3.54086	20.4016	5.66024
Ga0214976_100016360	deoxyribonuclease-4	KO:K01151	44.7672	28.5766	32.564	32.7637	18.4137	1.25269	0.568495	13.4582	2.09228
Ga0214976_100016361	predicted amino acid racemase	COG3457	24.7732	8.99223	12.6137	10.7758	10.0427	0.645254	1.31773	10.1508	3.5271
Ga0214976_100016362	diadenylate cyclase	KO:K18672	35.0206	22.6755	21.0147	27.2293	19.8579	1.39188	5.11646	9.29254	0.760829
Ga0214976_100016363	YbbR domain-containing protein	COG4856	18.6074	13.6129	16.0457	13.6352	8.99523	0.674276	0	4.65688	0.789801
Ga0214976_100016364	phosphoglucosamine mutase	KO:K03431	39.6497	18.4173	28.2172	25.1413	17.0729	1.26571	0.689285	5.24496	2.42152
Ga0214976_100016365	UTP--glucose-1-phosphate uridylyltransferase	KO:K00963	200.915	110.912	166.578	132.396	55.922	7.0968	2.73453	32.0594	10.9791
Ga0214976_100016366	hypothetical protein	Hypo-rule applied	117.479	53.796	70.5725	47.5036	53.637	2.83807	3.31193	22.4012	3.87837
Ga0214976_100016367	Fur family peroxide stress response transcriptional regulator	KO:K09825	179.795	93.7733	147.635	122.194	75.46	5.87398	10.2821	22.5381	6.49814
Ga0214976_100016369	bifunctional UDP-N-acetylglucosamine pyrophosphorylase/glucosamine-1-phosphate N-acetyltransferase	KO:K04042	73.8175	38.5486	63.0753	48.719	34.8525	4.47861	2.37123	17.9479	5.21355
Ga0214976_10001637	acetate kinase	KO:K00925	207.242	134.497	199.594	167.869	89.4248	11.3947	9.4658	48.0186	17.8148
Ga0214976_100016370	ribose-phosphate pyrophosphokinase	KO:K00948	27.923	17.4127	20.4739	20.4572	15.5909	1.80311	2.45487	6.91842	1.80697
Ga0214976_100016371	large subunit ribosomal protein L25	KO:K02897	68.3421	28.3477	38.54	35.3812	31.5156	2.56678	3.49457	27.576	3.2738
Ga0214976_100016372	PTH1 family peptidyl-tRNA hydrolase	KO:K01056	61.4442	31.1375	44.3364	33.4067	32.3773	2.4158	1.64451	13.4404	4.40175
Ga0214976_100016373	transcription-repair coupling factor (superfamily II helicase)	KO:K03723	47.1825	27.9527	35.4796	31.9716	25.5926	2.58662	2.4148	9.10235	1.4644
Ga0214976_100016374	XTP/dITP diphosphohydrolase/tetrapyrrole methylase family protein/MazG family protein/ATP diphosphatase	KO:K02428,KO:K02499,KO:K04765	33.1807	14.1839	12.9573	19.4573	18.8189	1.138	1.16201	9.8245	2.33271
Ga0214976_100016375	oxaloacetate decarboxylase alpha subunit	KO:K01571	74.6287	45.1436	54.3845	63.3058	27.2509	3.20774	4.91312	15.1387	3.72602
Ga0214976_100016376	Fe-S cluster biogenesis protein NfuA	COG0694	168.351	88.9038	121.493	131.028	63.6109	9.13577	11.7834	34.3154	15.1128
Ga0214976_100016377	phosphate starvation-inducible protein PhoH	COG1702	162.078	91.9353	123.089	113.539	55.4939	7.35744	4.16085	39.6089	9.59029
Ga0214976_100016378	hypothetical protein	KO:K07037	64.4313	34.3546	60.2766	42.7553	24.646	3.26245	1.63642	11.7272	2.50291
Ga0214976_100016379	probable rRNA maturation factor	KO:K07042	106.848	57.0755	101.956	82.295	32.7955	5.85316	4.78131	16.7089	7.35876
Ga0214976_10001638	uncharacterized protein	KO:K07040	125.315	57.2809	103.56	73.6144	73.2902	8.17872	7.59205	27.8152	8.38249
Ga0214976_100016380	CBS domain containing-hemolysin-like protein	COG1253	73.0052	53.158	64.0979	52.6751	24.2488	2.93795	0	13.5273	4.13653
Ga0214976_100016381	DNA repair protein RecO (recombination protein O)	KO:K03584	197.602	83.2123	149.024	108.068	51.6702	11.6195	7.45775	30.5713	20.8691
Ga0214976_100016382	glycyl-tRNA synthetase alpha chain	KO:K01878	35.0815	17.0064	18.458	25.7685	19.5288	1.98117	1.07892	4.56098	0.721967
Ga0214976_100016383	glycyl-tRNA synthetase beta chain	KO:K01879	32.1847	19.2076	23.0876	27.3119	15.0263	1.18104	1.14853	5.17895	2.76678
Ga0214976_100016384	hypothetical protein	KO:K09773	33.7165	25.4659	22.5048	28.4546	12.4509	2.03631	0	5.35763	1.39137
Ga0214976_100016385	dGTPase	KO:K01129	102.459	74.271	97.0905	88.5928	40.2831	4.48383	3.12672	21.1485	6.27684
Ga0214976_100016386	penicillin-binding protein 1A	KO:K05366	90.6287	63.6083	85.7721	74.9523	35.9017	4.56216	3.97796	17.3474	6.30449
Ga0214976_100016387	arginine decarboxylase	KO:K02626	59.2067	32.4932	48.7966	44.1371	29.2505	3.35887	3.91969	13.8083	2.6229
Ga0214976_100016388	spermidine synthase	KO:K00797	38.7901	23.2309	34.4313	29.8228	33.1161	2.39371	1.08631	9.1845	3.45286
Ga0214976_100016389	agmatinase	KO:K01480	63.407	35.9781	54.0447	47.7973	44.7301	3.93753	7.20934	15.0039	4.63866
Ga0214976_10001639	large subunit ribosomal protein L32	KO:K02911	205.38	71.6485	122.345	77.974	117.978	4.72531	12.0625	31.2755	6.45739
Ga0214976_100016390	spermidine synthase/S-adenosylmethionine decarboxylase	KO:K00797,KO:K01611	39.4298	17.661	21.1378	21.3487	43.2229	1.94398	0	4.47535	1.51803
Ga0214976_100016391	arginine deiminase	KO:K01478	91.5893	42.416	51.324	61.4399	41.65	2.36122	3.85765	12.8287	4.00115
Ga0214976_100016392	ornithine carbamoyltransferase	KO:K00611	74.999	41.835	52.9909	52.9981	37.2131	2.39098	2.32516	13.8921	1.71149
Ga0214976_100016393	CopG family nickel-responsive transcriptional regulator	KO:K07722	46.0403	28.945	43.1264	34.8153	17.184	2.88022	3.52917	9.94609	0.393597
Ga0214976_100016394	hypothetical protein	Hypo-rule applied	18.3554	9.58588	18.5465	8.10529	9.36365	0.424675	0.867267	2.44417	1.16068
Ga0214976_100016395	radical SAM superfamily enzyme with C-terminal helix-hairpin-helix motif	COG1031	18.9704	11.4462	15.6646	15.1363	8.05373	0.877431	0.551348	4.19536	2.30588
Ga0214976_100016396	NAD+ synthase	KO:K01916	117.435	54.1288	75.029	57.8036	51.3856	4.52341	1.27416	29.4454	4.6894
Ga0214976_100016397	hypothetical protein	Hypo-rule applied	10.2951	7.32256	2.21668	2.82551	13.8247	0	0	4.08979	0
Ga0214976_100016398	transcriptional/translational regulatory protein YebC/TACO1	COG0217	78.6869	42.4594	53.9644	46.5138	34.9203	2.6305	5.68798	14.9615	7.61234
Ga0214976_100016399	crossover junction endodeoxyribonuclease RuvC	KO:K01159	66.2045	33.4731	44.2337	44.9565	31.1616	3.53322	5.77241	13.5567	1.93134
Ga0214976_10001751	glycine reductase	KO:K10670	38.6335	43.1808	45.3726	48.6775	42.4462	1.81814	0	16.7426	0
Ga0214976_100017510	hypothetical protein	KO:K09769	252.316	154.549	207.61	188.056	102.611	12.8488	21.8172	60.157	20.7151
Ga0214976_100017511	ribonuclease Y	KO:K18682	255.651	173.063	205.044	211.263	134.042	16.2663	10.8155	64.9673	14.5779
Ga0214976_100017514	NSS family neurotransmitter:Na+ symporter	KO:K03308	153.676	72.6722	59.1542	90.6518	94.7337	3.2089	10.922	64.0242	5.95125
Ga0214976_100017515	NSS family neurotransmitter:Na+ symporter	KO:K03308	1796.77	515.72	1123.48	943.388	373.188	54.4102	49.3461	423.324	112.41
Ga0214976_100017516	ATP-dependent DNA helicase RecG	KO:K03655	39.2553	22.7083	36.5412	32.6752	16.0307	1.67025	0.227398	6.53682	1.29341
Ga0214976_100017517	cell division initiation protein	KO:K04074	44.9312	30.4197	40.9918	34.1689	15.6124	2.50778	0	9.23729	1.7135
Ga0214976_100017518	cell division inhibitor SepF	KO:K09772	53.1606	27.1255	35.6449	37.1093	17.8466	1.49564	1.22175	12.3955	0
Ga0214976_100017519	hypothetical protein	KO:K06997	68.2473	32.1828	55.7876	36.0152	21.8662	2.31399	0	11.4154	3.38807
Ga0214976_10001752	betaine reductase	KO:K10672	243.226	144.879	209.479	184.885	81.8241	10.865	20.0412	63.7429	13.4108
Ga0214976_100017520	hypothetical protein	Hypo-rule applied	67.7244	44.8402	68.1275	51.3641	23.1432	3.51847	3.07945	13.8859	6.52538
Ga0214976_100017521	ribonucleoside-diphosphate reductase alpha chain	KO:K00525	32.5668	22.1292	31.3743	25.3266	17.4112	1.62559	1.28507	7.96763	1.00324
Ga0214976_100017522	phosphoglycolate phosphatase/pyrophosphatase PpaX	KO:K01091,KO:K06019	21.2759	8.91133	13.9527	12.659	10.0322	1.00891	0	3.48401	0.919152
Ga0214976_100017523	phosphoglycerate dehydrogenase-like enzyme	COG0111	32.6832	16.2802	21.7488	18.9914	12.7845	2.52436	0.490973	4.15105	1.47843
Ga0214976_100017524	6-pyruvoyltetrahydropterin/6-carboxytetrahydropterin synthase	KO:K01737	21.1973	10.0609	12.4976	10.4639	6.87736	1.47292	0	2.71272	1.2077
Ga0214976_100017525	uncharacterized protein YecE (DUF72 family)	COG1801	10.6982	5.75076	9.36245	9.40824	5.86997	1.4292	0	3.83863	0.813783
Ga0214976_100017526	replicative DNA helicase	KO:K02314	30.7123	18.4348	21.6221	21.3137	15.0583	1.12635	0.353881	8.77646	2.13123
Ga0214976_100017527	large subunit ribosomal protein L9	KO:K02939	35.391	16.2918	12.946	19.078	27.9355	1.05066	0	10.2799	2.87157
Ga0214976_100017528	uncharacterized protein YybS (DUF2232 family)	COG4241	13.5783	3.53581	4.93593	4.71066	9.47196	0.243433	0	2.24169	0.831659
Ga0214976_100017529	small subunit ribosomal protein S18	KO:K02963	321.773	136.043	199.797	183.998	129.922	16.6952	14.4645	45.4234	25.5804
Ga0214976_10001753	betaine reductase	KO:K10672	157.918	106.028	108.099	87.8073	61.6899	6.79479	3.46907	48.8835	13.9282
Ga0214976_100017530	single-strand DNA-binding protein	KO:K03111	182.483	110.479	117.566	107.469	132.095	14.0223	11.0526	57.2009	13.111
Ga0214976_100017531	small subunit ribosomal protein S6	KO:K02990	161.262	82.0289	116.563	106.872	72.2715	6.96526	0	32.0703	8.95849
Ga0214976_100017532	septum formation initiator	pfam04977	69.6733	42.1294	64.2574	53.7705	16.3157	2.75178	1.60562	14.4801	2.68603
Ga0214976_100017533	arginyl-tRNA synthetase	KO:K01887	157.638	84.8554	119.206	102.805	63.4601	5.33638	7.35963	41.1634	7.48186
Ga0214976_100017534	hypothetical protein	Hypo-rule applied	74.4866	43.3669	62.1147	49.694	26.6944	4.02954	3.29164	19.4096	5.33715
Ga0214976_100017535	preprotein translocase subunit SecA	KO:K03070	94.2566	51.8328	70.4617	63.6647	41.5634	6.84221	3.89124	29.7092	7.33816
Ga0214976_100017536	succinyl-diaminopimelate desuccinylase	KO:K01439	123.508	92.9263	112.248	95.5871	61.7007	8.27751	5.05185	30.008	8.45124
Ga0214976_100017537	CDP-diacylglycerol--glycerol-3-phosphate 3-phosphatidyltransferase	KO:K00995	92.6472	51.6369	59.7182	62.9777	49.3443	5.4639	6.61234	26.0893	7.46671
Ga0214976_100017538	branched-chain amino acid transport system ATP-binding protein	KO:K01996	55.7153	24.202	35.2669	36.6286	22.7237	2.31399	4.05053	11.4154	1.80697
Ga0214976_100017539	branched-chain amino acid transport system ATP-binding protein	KO:K01995	43.2419	26.4312	32.9428	29.6972	32.6117	2.5144	1.14109	11.2555	3.05428
Ga0214976_10001754	glycine reductase	KO:K10670	159.035	93.0941	112.245	106.917	87.1097	7.1315	4.42447	50.0849	7.4017
Ga0214976_100017540	branched-chain amino acid transport system permease protein	KO:K01998	40.8295	24.8919	27.9696	28.604	20.1996	1.7799	0.908723	9.98793	1.5202
Ga0214976_100017541	branched-chain amino acid transport system permease protein	KO:K01997	49.0834	31.5608	37.3955	39.0313	22.9844	2.08485	1.59663	10.7992	2.671
Ga0214976_100017542	branched-chain amino acid transport system substrate-binding protein	KO:K01999	1141.36	729.425	683.862	836.832	468.181	54.6743	60.186	286.832	76.243
Ga0214976_100017543	glycine C-acetyltransferase	KO:K00639	86.1708	49.2759	78.0669	60.8545	39.8705	2.56171	3.62181	20.1875	2.96214
Ga0214976_100017544	pyruvate formate lyase activating enzyme	KO:K04069	43.2263	20.1544	28.343	30.2631	17.0853	1.85772	2.06936	7.77595	2.30788
Ga0214976_100017545	ribonucleoside-triphosphate reductase	KO:K00527	102.065	57.4912	78.3751	70.4367	37.6767	5.20691	6.04431	19.0533	5.99202
Ga0214976_100017546	transcriptional repressor NrdR	KO:K07738	50.801	22.203	26.0717	24.6379	13.0828	4.323	1.4714	12.4403	3.93841
Ga0214976_100017547	small subunit ribosomal protein S21	KO:K02970	268.628	127.003	156.942	125.52	141.324	10.7617	38.4605	49.5503	16.5447
Ga0214976_100017548	histidine triad (HIT) family protein	KO:K02503	475.921	228.93	304.861	227.765	191.195	24.9101	13.9373	81.6999	18.6526
Ga0214976_100017549	curved DNA-binding protein CbpA	COG2214	31.9524	16.7974	26.5362	21.3986	12.9218	0.638643	0	4.41078	1.04729
Ga0214976_10001755	thioredoxin 1	KO:K03671	76.0378	29.263	39.0204	37.7853	47.1625	2.90902	5.94078	26.7881	7.45375
Ga0214976_100017550	molecular chaperone DnaK	KO:K04043	18.5664	13.3386	18.2747	16.927	9.68775	0.585832	0.59819	4.38321	0.700499
Ga0214976_100017551	hypothetical protein	KO:K07057	43.5879	22.8394	36.022	29.7309	22.6667	2.76523	0.45177	9.16704	2.2673
Ga0214976_100017552	threonylcarbamoyladenosine tRNA methylthiotransferase MtaB	KO:K18707	30.0341	15.4069	19.2119	20.6244	17.4526	1.72514	3.17076	8.53884	0.825124
Ga0214976_100017553	16S rRNA (uracil1498-N3)-methyltransferase	KO:K09761	71.6987	23.5464	32.7318	29.5582	29.6559	3.91524	7.03618	22.714	2.56818
Ga0214976_100017554	ribosomal protein L11 methyltransferase	KO:K02687	26.1504	10.5494	11.7361	13.3211	15.336	1.34366	0	5.8773	1.10171
Ga0214976_100017555	molecular chaperone DnaJ	KO:K03686	135.451	120.386	145.769	125.068	84.7176	10.4756	2.93631	29.7909	7.29805
Ga0214976_100017556	molecular chaperone DnaK	KO:K04043	117.295	86.7253	127.161	104.847	65.9661	8.14021	6.44336	32.2504	6.81239
Ga0214976_100017557	molecular chaperone GrpE	KO:K03687	29.6232	16.637	14.8439	19.7093	18.3225	1.30116	3.03682	7.27473	1.01606
Ga0214976_100017558	heat-inducible transcriptional repressor	KO:K03705	63.4951	35.4281	46.6587	40.3172	27.629	3.77944	0.467778	13.7105	2.97367
Ga0214976_100017559	probable phosphoglycerate mutase	KO:K15634	9.12188	6.2957	8.00447	8.7859	7.39577	1.06917	0	1.2307	0.730536
Ga0214976_10001756	hypothetical protein	Hypo-rule applied	79.9687	38.6513	75.5628	54.5721	31.9254	3.91599	0	12.8789	2.6757
Ga0214976_100017560	dihydropteroate synthase	KO:K00796	42.7608	24.4882	35.7396	26.2822	15.3599	1.37705	2.8122	10.4616	3.95181
Ga0214976_100017561	2-amino-4-hydroxy-6-hydroxymethyldihydropteridine diphosphokinase	KO:K00950	19.3494	14.7868	19.0097	17.1715	8.7129	0.479838	2.93977	3.314	1.96717
Ga0214976_100017562	hypothetical protein	Hypo-rule applied	37.9171	20.9823	31.1718	25.0809	12.9175	0.66397	0	8.02498	0.453675
Ga0214976_100017563	alpha-amylase/alpha-mannosidase (GH57 family)/alpha-amylase/alpha-mannosidase (GH57 family)	COG1449,COG1449	47.4461	26.2138	37.6918	29.4033	18.0146	1.69976	1.3885	9.72691	1.85825
Ga0214976_100017564	1,4-alpha-glucan branching enzyme	KO:K00700	50.9967	27.5117	43.7631	37.8935	19.3782	1.77263	0.775727	10.931	1.90331
Ga0214976_100017565	hypothetical protein	KO:K07150	43.3229	23.8602	34.6758	34.6361	10.9607	0.812576	1.32755	5.98618	1.33251
Ga0214976_100017566	Zn finger protein HypA/HybF involved in hydrogenase expression	COG0375	606.27	238.041	417.54	339.871	202.476	26.0186	26.5674	88.1845	42.4694
Ga0214976_100017567	arsenite-transporting ATPase	KO:K01551	74.0442	39.0835	46.6634	47.4388	40.9986	2.11565	4.57472	12.8927	4.08162
Ga0214976_100017568	hypothetical protein	Hypo-rule applied	185.339	108.134	139.649	145.14	69.1488	9.732	10.3694	51.628	11.5646
Ga0214976_100017569	carbon starvation protein CstA/carbon starvation protein CstA	COG1966,COG1966	421.958	295.633	313.168	342.276	154.171	16.3979	8.4816	88.5245	14.4824
Ga0214976_10001757	hydrogenase expression/formation protein HypE	KO:K04655	118.811	63.9037	95.338	85.6739	52.052	6.64919	2.90977	22.1412	4.38098
Ga0214976_100017570	hypothetical protein	Hypo-rule applied	45.9675	22.1109	26.5596	23.0326	20.3869	1.7465	0	10.5544	1.49168
Ga0214976_100017571	ribosomal-protein-alanine N-acetyltransferase	KO:K03789	135.935	80.0766	120.063	112.266	49.492	5.18206	3.84828	29.8248	7.08156
Ga0214976_100017572	8-amino-3,8-dideoxy-alpha-D-manno-octulosonate transaminase	KO:K19715	147.271	90.6753	79.7051	92.2538	65.1273	4.53855	3.54968	28.6778	4.22276
Ga0214976_100017573	alcohol dehydrogenase	KO:K13954	60.3496	29.3397	35.0184	40.7909	26.7322	1.50078	1.63461	8.98312	1.77745
Ga0214976_100017574	3-deoxy-D-manno-octulosonic-acid transferase	KO:K02527	37.2004	20.4795	27.3348	23.5525	16.1228	1.42649	0.416166	10.3212	0.417723
Ga0214976_100017575	arabinose-5-phosphate isomerase	KO:K06041	80.475	55.1653	65.951	59.0186	38.6212	4.12302	5.61333	16.6108	2.97367
Ga0214976_100017576	2-dehydro-3-deoxyphosphooctonate aldolase (KDO 8-P synthase)	KO:K01627	65.2065	42.0698	43.8316	49.0321	30.6111	2.19549	2.2418	11.0564	4.31286
Ga0214976_100017577	3-deoxy-manno-octulosonate cytidylyltransferase (CMP-KDO synthetase)	KO:K00979	109.175	61.4113	87.1733	79.984	37.73	2.47576	6.31997	25.6482	3.17181
Ga0214976_100017578	tetraacyldisaccharide 4'-kinase	KO:K00912	61.0203	38.1582	44.5248	41.0665	28.0722	2.09615	1.99104	17.0582	2.59804
Ga0214976_100017579	phosphate:Na+ symporter	KO:K03324	180.363	109.709	174.812	133.92	57.2325	8.73798	3.56893	32.186	9.15471
Ga0214976_10001758	hydrogenase expression/formation protein HypD	KO:K04654	60.7394	38.6255	48.9757	50.0666	25.8006	3.42238	1.31047	11.8183	3.9461
Ga0214976_100017580	ABC-type multidrug transport system fused ATPase/permease subunit/alpha-D-ribose 1-methylphosphonate 5-triphosphate synthase subunit PhnL	COG1132,COG4778	111.312	67.1672	100.039	78.4074	33.67	5.70332	1.87427	20.6759	5.3751
Ga0214976_100017581	lipid-A-disaccharide synthase	KO:K00748	45.8011	20.4581	41.0698	32.7747	19.7031	1.68792	0.861763	12.1433	4.46909
Ga0214976_100017582	lipid-A-disaccharide synthase	KO:K00748	114.426	50.2343	89.1162	70.583	33.6594	5.59123	1.72353	21.858	8.64986
Ga0214976_100017583	hypothetical protein	KO:K09949	126.698	89.7767	114.054	105.156	51.8612	7.62314	3.52481	29.1391	7.86221
Ga0214976_100017584	lipopolysaccharide export system permease protein	KO:K11720	115.024	65.2439	86.3444	77.9044	53.6901	5.04573	4.20586	25.1287	5.20663
Ga0214976_100017585	3-deoxy-D-manno-octulosonate 8-phosphate phosphatase (KDO 8-P phosphatase)	KO:K03270	26.7819	13.3149	16.5272	16.5382	16.6975	1.48546	0	14.249	2.36828
Ga0214976_100017586	UDP-N-acetylglucosamine acyltransferase	KO:K00677	51.2988	28.3601	32.6905	30.2774	33.332	2.71271	2.33257	15.4484	2.73152
Ga0214976_100017587	3-hydroxyacyl-[acyl-carrier-protein] dehydratase	KO:K02372	74.6027	54.0467	48.1888	53.1812	40.332	3.51089	2.04854	21.3612	6.85402
Ga0214976_100017588	UDP-3-O-[3-hydroxymyristoyl] N-acetylglucosamine deacetylase	KO:K02535	62.8014	33.9607	41.9023	48.136	24.0181	2.76391	5.64444	14.6348	4.91015
Ga0214976_100017589	UDP-3-O-[3-hydroxymyristoyl] glucosamine N-acyltransferase	KO:K02536	25.1576	15.8003	18.2688	20.1758	11.9484	0.548354	3.5835	6.56448	1.49871
Ga0214976_10001759	hydrogenase expression/formation protein HypC	KO:K04653	58.0991	38.9044	36.2981	32.6749	31.9746	0.986109	0	14.7562	2.02135
Ga0214976_100017590	hypothetical protein	Hypo-rule applied	37.3569	20.8839	29.2026	26.9583	17.5545	0.93991	3.07116	9.52082	1.54132
Ga0214976_100017591	outer membrane protein insertion porin family	KO:K07277	107.03	59.4372	79.519	77.378	51.9058	4.72962	6.93452	29.1752	10.1092
Ga0214976_100017592	hypothetical protein	Hypo-rule applied	53.2192	24.7203	33.0953	29.4843	19.9747	2.05343	2.79566	13.3941	2.80612
Ga0214976_100017593	RNA polymerase sporulation-specific sigma factor	KO:K03091	61.347	23.0765	38.3076	36.0749	21.4108	2.21448	0.822253	19.4654	2.47598
Ga0214976_100017594	alpha-ribazole phosphatase/probable phosphoglycerate mutase	KO:K02226,KO:K15634	30.5724	14.8968	18.9625	22.4068	20.0605	1.79847	3.67281	7.03861	4.17809
Ga0214976_100017595	carbon storage regulator	KO:K03563	24.5255	10.6455	19.9947	14.6384	12.7898	1.97222	2.01382	5.67545	0
Ga0214976_100017596	flagellar assembly factor FliW	KO:K13626	36.2945	24.9993	28.1912	23.4597	18.827	3.74602	0	10.2409	2.23962
Ga0214976_10003121	threonine synthase	KO:K01733	11.0449	8.0146	8.28278	9.93668	2.31517	1.00407	0.455668	1.02735	0.304915
Ga0214976_100031210	hypothetical protein	Hypo-rule applied	50.317	27.994	34.7662	32.5996	15.5074	1.70805	0	7.37288	1.7506
Ga0214976_100031211	N6-L-threonylcarbamoyladenine synthase	KO:K01409	138.092	89.1802	116.257	101.044	59.0822	5.19257	7.71216	30.9721	11.4502
Ga0214976_100031212	chaperonin GroES	KO:K04078	1926.11	1089.05	1044.13	1161.9	1084.54	110.743	99.9689	569.017	108.019
Ga0214976_100031213	chaperonin GroEL	KO:K04077	1850.73	1388.56	1550.08	1524.12	1181.82	153.447	94.8176	536.094	157.638
Ga0214976_100031214	hypothetical protein	KO:K06898	44.5185	22.5333	30.8485	34.6491	20.2306	1.71578	0.637081	11.85	2.98416
Ga0214976_100031215	ribonuclease R	KO:K12573	49.3819	29.0195	36.7251	35.1839	24.8574	1.54751	2.18791	11.9211	2.76545
Ga0214976_100031216	predicted PurR-regulated permease PerM	COG0628	39.5972	19.071	21.8384	24.4624	14.583	0.848575	0.433238	7.57003	1.01467
Ga0214976_100031217	molybdopterin-guanine dinucleotide biosynthesis protein B	KO:K03753	73.9817	32.7305	42.3001	40.9001	28.5203	1.28272	0	18.9837	2.00332
Ga0214976_100031218	K(+)-stimulated pyrophosphate-energized sodium pump	KO:K15987	221.997	158.956	198.316	188.154	102.973	12.6982	9.20957	45.8991	12.0821
Ga0214976_100031219	DNA primase	KO:K02316	16.4635	8.00879	10.2406	10.4637	11.5496	0.664539	0.542846	3.97768	0.454064
Ga0214976_10003122	homoserine kinase	KO:K00872	18.222	14.4777	15.5672	18.3909	9.47196	1.21716	0	4.48337	0.997991
Ga0214976_100031220	RNA polymerase primary sigma factor	KO:K03086	32.215	18.7524	24.6886	26.3745	14.1755	2.07282	0.384828	8.2425	3.09014
Ga0214976_100031221	peptide chain release factor subunit 1	KO:K03265	57.961	29.9206	38.2952	39.1154	26.0979	2.33738	1.6603	18.9506	2.63865
Ga0214976_100031222	ribosomal 50S subunit-recycling heat shock protein	COG1188	19.0069	9.06859	12.2773	11.7937	12.2068	0	0	7.87886	0.584608
Ga0214976_100031223	enolase	KO:K01689	64.5451	36.4158	50.2329	42.1614	27.1002	2.97206	2.57495	11.4036	3.81533
Ga0214976_100031224	redox-sensing transcriptional repressor	KO:K01926	66.8518	25.8465	33.112	38.8707	31.2248	1.82384	0	15.5354	3.48932
Ga0214976_100031225	preprotein translocase subunit YajC	KO:K03210	74.8028	30.1031	44.7478	34.9915	39.5856	1.52604	1.55824	19.3226	0
Ga0214976_100031226	preprotein translocase subunit SecD	KO:K03072	115.513	78.3345	95.2598	98.4054	36.5736	3.73217	2.03248	23.294	4.98687
Ga0214976_100031227	preprotein translocase subunit SecF	KO:K03074	51.2103	32.1068	41.1271	38.5051	28.4439	2.83807	0.526898	11.5825	2.46805
Ga0214976_100031228	polyhydroxyalkanoate synthesis regulator phasin	COG3937	164.026	73.7651	117.233	98.9962	79.5389	6.28977	16.0562	33.4852	15.0418
Ga0214976_100031229	MoaA/NifB/PqqE/SkfB family radical SAM enzyme	COG0535	181.053	106.689	147.193	127.122	67.3991	10.5855	2.29279	43.2007	11.5068
Ga0214976_10003123	aspartate kinase	KO:K00928	38.6616	22.1816	26.3088	26.6995	21.491	1.21015	1.14063	13.5012	2.03537
Ga0214976_100031230	uncharacterized integral membrane protein	COG5416	150.878	82.0967	119.336	98.7044	63.6758	5.10075	1.30209	30.0908	6.53479
Ga0214976_100031231	single-stranded-DNA-specific exonuclease	KO:K07462	85.8221	50.5177	72.2446	61.6529	33.8017	4.57836	3.73996	15.7291	6.35283
Ga0214976_100031232	GTP pyrophosphokinase	KO:K00951	157.005	106.67	150.135	138.056	62.4496	8.38042	9.12769	28.8811	10.0641
Ga0214976_100031233	D-tyrosyl-tRNA(Tyr) deacylase	KO:K07560	57.9233	30.921	54.5667	44.0645	18.5748	2.55738	2.08906	10.0088	1.7474
Ga0214976_100031234	glyoxylase-like metal-dependent hydrolase (beta-lactamase superfamily II)	COG0491	87.9907	51.6214	71.2307	62.8506	26.4938	4.74198	3.72462	15.1156	6.7294
Ga0214976_100031235	rod shape-determining protein MreB	KO:K03569	72.8845	51.4052	55.7947	58.0614	37.5481	4.26395	5.49966	18.8576	5.82691
Ga0214976_100031236	rod shape-determining protein MreC	KO:K03570	66.4431	41.2583	49.178	43.8567	28.0868	2.88737	0.589655	19.2768	4.5376
Ga0214976_100031237	hypothetical protein	Hypo-rule applied	32.9414	14.3731	22.0605	22.4691	12.3598	1.50467	2.04854	4.61864	1.0281
Ga0214976_100031238	penicillin-binding protein 2	KO:K05515	27.173	14.497	17.6778	15.6628	14.9788	1.00716	1.37121	3.55526	0.825805
Ga0214976_100031239	septum site-determining protein MinC	KO:K03610	78.6369	39.3365	49.832	44.0782	36.7293	2.17836	0.741438	15.0448	2.72878
Ga0214976_10003124	aspartate-semialdehyde dehydrogenase	KO:K00133	165.598	74.4226	157.195	124.431	46.8789	6.06289	2.85729	31.4049	13.3839
Ga0214976_100031240	septum site-determining protein MinD	KO:K03609	183.755	114.026	180.583	166.178	72.4416	10.4725	8.91116	36.4988	10.7334
Ga0214976_100031241	cell division topological specificity factor	KO:K03608	258.41	138.735	254.221	178.879	71.8132	9.5165	5.30032	38.8378	10.6403
Ga0214976_100031242	rod shape determining protein RodA	KO:K05837	44.3612	22.7353	33.2208	21.9318	14.0327	1.90929	0.433238	6.10486	0.289906
Ga0214976_100031243	radical SAM superfamily enzyme YgiQ (UPF0313 family)	COG1032	48.8918	19.0817	41.2579	26.4239	20.8746	2.4012	1.59039	8.81484	1.59634
Ga0214976_100031244	uncharacterized protein (DUF2344 family)	COG5011	45.8984	20.0236	37.1682	26.6198	9.30328	2.59022	1.62761	4.58701	0.544566
Ga0214976_100031245	ribonuclease G	KO:K08301	25.0545	12.7021	19.5563	15.3401	12.5094	0.933376	0.317689	3.04411	0.212585
Ga0214976_100031246	chromosome segregation protein	KO:K03529	13.8218	6.89137	12.1455	8.05757	7.26471	0.785529	0.557983	2.90919	0.56007
Ga0214976_100031247	tRNA1(Val) A37 N6-methylase TrmN6	COG4123	40.8196	18.9964	38.9298	29.4527	11.9745	1.27344	1.30031	4.03105	1.95776
Ga0214976_100031248	16S rRNA (cytidine1402-2'-O)-methyltransferase	KO:K07056	9.83563	5.80979	6.26851	5.61475	2.46544	0.407331	0	0.625161	0.371093
Ga0214976_100031249	methionyl-tRNA synthetase	KO:K01874	51.9073	40.1691	46.3642	44.3597	21.9378	2.81905	2.69478	8.83732	3.36059
Ga0214976_10003125	lipopolysaccharide export system protein LptA	COG1934	12.3256	7.43358	8.30404	9.38448	7.83075	1.23496	2.80225	3.15898	0.750063
Ga0214976_100031250	TatD DNase family protein	KO:K03424	60.0471	35.1603	64.8012	44.7713	26.5525	4.06435	0	10.743	4.73131
Ga0214976_100031251	queuine tRNA-ribosyltransferase	KO:K00773	59.1283	39.8578	62.574	46.5679	23.239	3.39815	2.10293	9.48253	2.25152
Ga0214976_100031252	L-threonylcarbamoyladenylate synthase	KO:K07566	87.4636	59.3548	85.4029	72.6353	33.7744	3.75357	3.35366	15.9325	4.48828
Ga0214976_100031254	DNA-directed RNA polymerase subunit beta	KO:K03043	125.969	60.2001	104.262	79.525	76.0991	6.80031	5.63552	36.9074	10.8643
Ga0214976_100031255	DNA-directed RNA polymerase subunit beta'	KO:K03046	146.819	97.6172	146.071	120.243	72.6121	7.11551	6.90593	38.0062	7.22058
Ga0214976_100031256	large subunit ribosomal protein L7A	KO:K07590	203.051	108.169	154.098	133.7	90.8886	7.35366	7.06709	38.8378	5.32015
Ga0214976_100031257	small subunit ribosomal protein S12	KO:K02950	187.97	94.5588	103.513	116.896	128.546	9.09559	8.96721	57.7642	3.42886
Ga0214976_100031258	small subunit ribosomal protein S7	KO:K02992	173.126	97.7721	95.9195	132.306	129.727	10.1506	13.1455	59.2759	5.75154
Ga0214976_100031259	elongation factor G	KO:K02355	99.8226	62.4314	86.5206	76.9419	64.7319	4.71051	4.80988	26.2072	2.60552
Ga0214976_10003126	lipopolysaccharide export system ATP-binding protein	KO:K06861	23.0203	15.8143	19.1253	15.4013	19.1512	1.28398	1.9666	6.28136	1.5353
Ga0214976_100031260	elongation factor Tu	KO:K02358	48.5314	19.5173	25.0787	22.4328	19.208	0	0	9.74114	0
Ga0214976_10003127	hydrogenase 3 maturation protease	KO:K08315	30.5054	16.6652	27.762	19.9307	17.248	1.53443	3.1336	8.83125	1.04844
Ga0214976_10003128	putative peptidoglycan lipid II flippase	KO:K03980	84.9997	34.3698	68.9358	46.3773	23.8038	4.06172	1.53608	12.2945	4.83104
Ga0214976_10003129	molecular chaperone Hsp33	KO:K04083	20.2097	11.4841	11.8675	16.9005	11.57	0.393554	0.535808	5.73816	1.61344
Ga0214976_10004791	glycine cleavage system pyridoxal-binding protein P	COG0403	25.747	15.3678	19.7008	19.6652	10.9403	1.18956	0.441693	4.48129	1.77338
Ga0214976_100047910	hypothetical protein	Hypo-rule applied	314.625	159.979	171.049	202.053	139.728	11.3746	14.4181	101.133	32.696
Ga0214976_100047911	uncharacterized protein (DUF362 family)	COG2006	560.563	399.9	316.829	410.354	217.584	20.9699	17.1298	166.399	42.3141
Ga0214976_100047912	murein DD-endopeptidase MepM/ murein hydrolase activator NlpD	COG0739	91.1782	58.7149	71.6772	63.465	41.681	4.68657	4.37525	19.4206	2.56178
Ga0214976_100047913	4-oxalocrotonate tautomerase	KO:K01821	299.334	153.222	217.503	171.955	124.776	16.4921	18.7111	54.8419	21.2852
Ga0214976_100047914	FSR family fosmidomycin resistance protein-like MFS transporter	KO:K08223	136.498	78.4311	115.25	103.722	36.5715	6.08359	2.36645	26.2324	9.23728
Ga0214976_100047915	23S rRNA (cytosine1962-C5)-methyltransferase	KO:K06969	134.466	50.1655	115.072	61.638	38.8481	5.41901	2.41454	27.8996	5.655
Ga0214976_100047916	molybdopterin synthase sulfur carrier subunit	KO:K03636	31.2733	10.9232	23.0414	12.338	15.7482	1.01183	0	1.1647	1.38272
Ga0214976_100047917	aldehyde:ferredoxin oxidoreductase	KO:K03738	41.601	25.5442	36.5872	30.0752	16.19	1.85386	0.757189	7.25542	1.68894
Ga0214976_100047918	diaminopimelate decarboxylase	KO:K01586	20.1982	10.445	14.6102	14.0578	12.5274	1.00232	0	5.87367	1.12069
Ga0214976_100047919	H+/Cl- antiporter ClcA	COG0038	18.2156	7.08004	7.02543	8.93077	10.6867	0.732405	0	2.52917	1.50131
Ga0214976_10004792	radical SAM superfamily enzyme YgiQ (UPF0313 family)	COG1032	27.2251	16.6039	22.9894	18.2702	11.1146	0.734524	2.75007	6.34122	1.00377
Ga0214976_100047920	methylglyoxal synthase	KO:K01734	23.3458	11.4435	15.4589	18.5457	12.6029	1.21462	0	4.47401	1.65985
Ga0214976_100047921	tRNA (Thr-GGU) A37 N-methylase	COG1720	56.4532	38.3113	45.9998	60.4109	27.8193	2.1449	2.19015	12.962	4.39668
Ga0214976_100047922	pyruvate,orthophosphate dikinase	KO:K01006	83.4272	63.5494	65.6251	75.9211	33.739	3.27347	4.10016	19.2923	6.62058
Ga0214976_100047923	bacterioferritin	KO:K03594	993.306	587.609	739.882	676.558	298.106	37.4274	34.2973	175.642	56.3923
Ga0214976_100047924	branched-chain amino acid transport system substrate-binding protein	KO:K01999	198.29	140.475	176.367	156.152	65.5837	8.95849	5.28521	42.3935	8.43355
Ga0214976_100047925	branched-chain amino acid transport system permease protein	KO:K01997	53.1674	20.8603	34.5129	33.8791	11.6636	2.45257	2.22605	10.6651	3.91016
Ga0214976_100047926	branched-chain amino acid transport system permease protein	KO:K01998	29.2808	18.3829	27.6058	24.211	12.3815	1.41903	1.0538	5.34575	0
Ga0214976_100047927	branched-chain amino acid transport system ATP-binding protein	KO:K01995	18.6165	9.75229	11.936	9.61308	7.03676	0.142774	0	6.57378	0.585325
Ga0214976_100047928	branched-chain amino acid transport system ATP-binding protein	KO:K01996	52.0611	27.2651	32.6528	33.4192	23.4812	1.81042	6.05001	12.1248	3.37369
Ga0214976_100047929	hypothetical protein	Hypo-rule applied	71.3235	37.5972	53.3302	34.4042	35.9886	4.92296	1.82793	18.5456	3.66954
Ga0214976_10004793	uncharacterized protein YwlG (UPF0340 family)	COG4475	21.5899	12.8754	11.5997	16.8347	10.8381	0.417813	0	6.25217	0.570963
Ga0214976_100047930	rubrerythrin	COG1633	268.347	157.379	197.15	164.712	98.413	6.47734	4.72428	43.138	17.3871
Ga0214976_100047931	divalent metal cation (Fe/Co/Zn/Cd) transporter	COG0053	44.978	26.339	29.7117	27.7357	18.5607	1.64219	0	10.2616	2.56473
Ga0214976_100047932	hypothetical protein	Hypo-rule applied	52.6212	45.9429	73.0157	59.5507	26.1711	2.01782	0	9.29068	5.51491
Ga0214976_100047933	aldehyde:ferredoxin oxidoreductase	KO:K03738	181.139	147.521	188.838	155.829	95.4936	11.9707	7.36025	40.4489	8.09138
Ga0214976_100047934	Fe-S-cluster-containing hydrogenase component 2	COG1142	113.333	57.7703	90.8976	78.1496	50.0953	2.2001	3.9938	14.6322	5.01092
Ga0214976_100047935	NADH dehydrogenase/NADH:ubiquinone oxidoreductase subunit G/predicted molibdopterin-dependent oxidoreductase YjgC	COG1034,COG3383	85.7662	54.5933	78.5562	71.0725	39.812	3.75863	3.19826	24.8773	8.13258
Ga0214976_100047936	NADH:ubiquinone oxidoreductase subunit F (NADH-binding)/(2Fe-2S) ferredoxin/formate hydrogenlyase subunit 6/NADH:ubiquinone oxidoreductase subunit I	COG1894,COG3411,COG1143	80.2473	41.9745	57.7806	53.9707	38.7431	4.37447	1.53146	16.5448	2.90357
Ga0214976_100047937	NADH:ubiquinone oxidoreductase subunit E	COG1905	59.3988	19.4437	28.5357	30.6567	33.811	2.13289	6.77563	15.2763	1.94314
Ga0214976_100047938	drug/metabolite transporter (DMT)-like permease	COG0697	29.5722	16.1589	26.4976	17.3504	18.865	1.59996	0	6.69703	3.18027
Ga0214976_100047939	DNA polymerase (family 10)	KO:K02347	28.8391	18.7488	25.7962	25.0373	15.2479	1.60313	1.0913	6.3049	2.37333
Ga0214976_10004794	predicted polyphosphate/ATP-dependent NAD kinase	COG3199	15.1769	5.8056	6.72779	8.33063	12.2548	0.205403	1.25842	5.67445	0.98243
Ga0214976_100047940	hypothetical protein	Hypo-rule applied	43.9892	23.5628	35.4768	37.9632	30.0474	3.15912	0	6.06066	3.59758
Ga0214976_100047941	alkylhydroperoxidase/carboxymuconolactone decarboxylase family protein YurZ	COG0599	396.776	129.4	212.934	179.82	132.112	16.623	8.66739	65.1383	16.433
Ga0214976_100047942	poly(A) polymerase/tRNA nucleotidyltransferase (CCA-adding enzyme)	KO:K00970,KO:K00974	33.5111	16.9774	22.8902	22.1765	21.1495	1.32933	1.0859	6.73274	1.57439
Ga0214976_100047943	ferredoxin	COG1145	1843.04	519.63	978.998	1000.59	570.53	48.4276	71.4267	260.139	135.115
Ga0214976_100047944	glycerol-3-phosphate dehydrogenase (NAD(P)+)	KO:K00057	43.8426	23.6083	37.0887	32.6164	24.5058	2.07376	0	9.01779	2.20414
Ga0214976_100047945	acylphosphatase	KO:K01512	19.4126	9.80018	21.3829	10.7678	9.8784	0.42313	1.72823	0.974114	0.57823
Ga0214976_100047946	SSS family solute:Na+ symporter	KO:K03307	12.606	5.04887	8.11899	8.43248	12.8316	0.380513	0	1.2264	0.623989
Ga0214976_100047947	hypothetical protein	KO:K07105	7.61769	2.42304	3.85087	4.36316	14.2321	0.68582	0	1.57887	0.93721
Ga0214976_100047948	activator of 2-hydroxyglutaryl-CoA dehydratase/predicted nucleotide-binding protein (sugar kinase/HSP70/actin superfamily)/predicted nucleotide-binding protein (sugar kinase/HSP70/actin superfamily)/activator of 2-hydroxyglutaryl-CoA dehydratase	COG1924,COG3581,COG3580,COG1924	96.6294	64.382	98.3159	74.4486	39.0733	4.80788	3.65586	19.4876	6.39548
Ga0214976_100047949	2,4-dienoyl-CoA reductase-like NADH-dependent reductase (Old Yellow Enzyme family)	COG1902	7.03038	6.94509	8.32553	10.1834	3.93362	0.808763	1.65165	1.8619	0.414457
Ga0214976_10004795	3-oxoacyl-[acyl-carrier protein] reductase	KO:K00059	522.141	342.155	504.566	400.947	181.873	27.7191	19.9792	128.31	41.7283
Ga0214976_100047950	peptide/nickel transport system substrate-binding protein	KO:K02035	8.10904	5.78213	5.69742	4.37298	9.16982	0.883753	2.40639	0.678181	0.402565
Ga0214976_10004796	glutamate racemase	KO:K01776	195.152	126.757	181.72	159.568	71.3578	13.5337	13.8193	47.4126	32.3655
Ga0214976_10004797	uncharacterized protein (UPF0261 family)	COG5441	54.1989	32.7409	25.5975	39.1231	16.6996	1.15304	0.784908	15.0421	1.57569
Ga0214976_10004798	predicted TIM-barrel enzyme	COG5564	86.039	73.8183	38.5558	79.6217	25.2737	2.08781	1.70549	28.5185	5.70622
Ga0214976_10004799	glutamate dehydrogenase/leucine dehydrogenase	COG0334	257.997	118.919	146.557	140.6	147.799	11.2643	12.9536	82.0764	17.4855
Ga0214976_10005081	ribosome-associated protein	KO:K09710	61.7306	25.8772	50.4239	45.28	13.3821	2.86603	0	6.59806	1.56663
Ga0214976_100050810	cyclic pyranopterin phosphate synthase	KO:K03639	27.8086	15.9454	24.3726	19.1278	12.086	1.19467	0	5.22561	1.46932
Ga0214976_100050811	putative molybdopterin biosynthesis protein	KO:K07219	34.9699	20.4245	27.4574	24.4035	12.3848	1.22421	1.50004	4.65023	0.920119
Ga0214976_100050812	molybdopterin molybdotransferase	KO:K03750	40.1193	25.7657	29.249	33.0075	16.2959	1.59398	0.765934	6.69164	2.56266
Ga0214976_100050813	cell division protein FtsN	COG3087	61.8137	42.3634	49.4122	48.5562	27.7498	1.50143	0.766552	13.3941	2.05178
Ga0214976_100050814	radical SAM superfamily enzyme YgiQ (UPF0313 family)	COG1032	78.3394	40.4566	55.8507	47.6264	26.3882	3.99086	1.59806	15.1325	4.59823
Ga0214976_100050815	cell division protein FtsZ	KO:K03531	278.725	162.832	204.165	203.669	108.83	11.1205	12.3874	65.8648	13.1245
Ga0214976_100050816	cell division protein FtsA	KO:K03590	118.279	68.5707	83.8716	84.2046	51.2689	6.58814	4.72717	33.4083	8.27307
Ga0214976_100050817	hypothetical protein	Hypo-rule applied	78.1255	40.7568	47.984	48.882	21.0217	3.0581	1.87357	14.4325	3.97011
Ga0214976_100050818	UDP-N-acetylmuramate--alanine ligase	KO:K01924	76.7741	34.6004	44.6978	38.3688	44.2587	3.31535	1.32109	21.7805	5.63563
Ga0214976_100050819	UDP-N-acetylglucosamine--N-acetylmuramyl-(pentapeptide) pyrophosphoryl-undecaprenol N-acetylglucosamine transferase	KO:K02563	76.1176	31.726	50.2233	44.0805	27.44	1.26939	3.88851	12.1764	4.48128
Ga0214976_10005082	triosephosphate isomerase	KO:K01803	30.3809	14.9638	21.6358	23.5517	14.869	0.859809	1.75589	5.60835	0.587487
Ga0214976_100050820	cell division protein FtsW	KO:K03588	53.1622	22.634	32.7074	27.6829	25.5152	1.25569	0.427394	11.3223	2.43096
Ga0214976_100050821	UDP-N-acetylmuramoylalanine--D-glutamate ligase	KO:K01925	67.5066	39.2054	45.6891	46.178	31.3685	1.52216	0	13.6277	2.31124
Ga0214976_100050822	phospho-N-acetylmuramoyl-pentapeptide-transferase	KO:K01000	41.9552	16.3377	23.694	22.9007	17.9404	0.970685	0.495581	6.98335	3.15042
Ga0214976_100050823	UDP-N-acetylmuramoyl-tripeptide--D-alanyl-D-alanine ligase	KO:K01929	41.6283	17.8251	23.8559	24.379	23.5144	1.56576	0	6.4504	3.26585
Ga0214976_100050824	UDP-N-acetylmuramoyl-L-alanyl-D-glutamate--2,6-diaminopimelate ligase	KO:K01928	46.3778	19.1508	26.0331	25.9042	17.1116	1.38068	0	8.65273	2.72534
Ga0214976_100050825	cell division protein FtsI (penicillin-binding protein 3)/stage V sporulation protein D (sporulation-specific penicillin-binding protein)	KO:K03587,KO:K08384	75.2752	37.7861	47.1591	41.3001	28.5303	4.4835	4.29195	19.192	6.03121
Ga0214976_100050826	hypothetical protein	Hypo-rule applied	400.702	168.713	297.316	209.251	119.067	11.9869	23.8825	82.1144	25.9695
Ga0214976_100050827	16S rRNA (cytosine1402-N4)-methyltransferase	KO:K03438	143.435	62.638	71.072	68.3023	52.3634	5.7859	5.25151	41.1442	5.97398
Ga0214976_100050828	DNA-binding transcriptional regulator/RsmH inhibitor MraZ	COG2001	289.243	129.352	200.996	204.241	87.4489	14.1373	3.33128	64.4668	17.0902
Ga0214976_100050829	chemotaxis protein methyltransferase CheR	KO:K00575	62.5863	30.6048	52.7229	37.3226	19.2423	1.59996	0.594078	8.70614	3.18027
Ga0214976_10005083	phosphoglycerate kinase	KO:K00927	194.13	118.611	187.286	155.211	61.6362	8.8004	5.9907	37.1432	15.0996
Ga0214976_100050830	V/A-type H+-transporting ATPase subunit D	KO:K02120	129.193	86.226	148.638	112.936	42.5059	6.25992	3.75998	27.975	10.5673
Ga0214976_100050831	V/A-type H+-transporting ATPase subunit B	KO:K02118	197.965	119.839	168.284	151.512	62.4496	9.33507	8.02695	37.5147	11.5259
Ga0214976_100050832	V/A-type H+-transporting ATPase subunit A	KO:K02117	212.978	155.662	208.659	179.363	82.9433	14.3114	6.05597	41.1098	11.9811
Ga0214976_100050833	V/A-type H+-transporting ATPase subunit F	KO:K02122	46.5514	17.0282	25.559	13.1411	18.7534	2.06558	8.4366	7.92548	0
Ga0214976_100050834	V/A-type H+-transporting ATPase subunit C	KO:K02119	106.306	44.4087	78.4355	55.074	53.0543	2.8888	4.24763	18.6213	5.21096
Ga0214976_100050835	V/A-type H+-transporting ATPase subunit E	KO:K02121	144.581	73.4732	108.648	68.9049	92.0867	8.28331	7.24976	28.6043	5.12077
Ga0214976_100050836	V/A-type H+-transporting ATPase subunit K	KO:K02124	143.829	71.2361	112.001	79.4632	93.2616	9.71698	4.96098	24.6071	2.98772
Ga0214976_100050837	V/A-type H+-transporting ATPase subunit I	KO:K02123	73.4699	36.916	51.885	42.5429	40.9778	5.20848	2.33774	13.9673	5.39691
Ga0214976_100050838	V/A-type H+-transporting ATPase subunit G/H/V-type H+-transporting ATPase subunit G/flagellar assembly protein FliH	KO:K02107,KO:K02152,KO:K02411	178.236	108.873	126.486	124.705	92.5889	12.1358	8.74715	42.7295	11.7065
Ga0214976_10005084	glyceraldehyde 3-phosphate dehydrogenase	KO:K00134	239.102	182.266	224.862	206.444	82.293	10.9947	10.2911	58.7968	20.9722
Ga0214976_100050841	wyosine [tRNA(Phe)-imidazoG37] synthetase (radical SAM superfamily)	COG0731	17.6543	9.48172	13.949	7.18133	11.0068	0.652796	0	2.25426	0.22302
Ga0214976_100050842	23S rRNA (uracil1939-C5)-methyltransferase	KO:K03215	27.9192	17.005	20.3841	20.9686	10.1959	1.06453	1.00337	5.08993	1.11902
Ga0214976_100050843	2-oxoglutarate ferredoxin oxidoreductase subunit gamma	KO:K00177	38.3325	29.2834	32.6682	32.6077	26.411	1.6623	0	10.0456	3.12347
Ga0214976_100050844	2-oxoglutarate ferredoxin oxidoreductase subunit beta	KO:K00175	83.3673	57.5854	59.9515	65.3721	27.9413	4.81884	2.89441	18.5983	4.4547
Ga0214976_100050845	2-oxoglutarate ferredoxin oxidoreductase subunit alpha	KO:K00174	47.2666	32.5759	25.5656	36.045	24.7759	2.67024	1.25842	16.314	2.3859
Ga0214976_100050846	2-oxoglutarate ferredoxin oxidoreductase subunit delta	KO:K00176	39.5542	17.2959	18.3252	23.3584	21.9786	0	0	10.4032	3.85955
Ga0214976_100050847	tRNA threonylcarbamoyladenosine biosynthesis protein TsaB	KO:K14742	44.8402	25.6149	41.772	27.0064	25.1901	2.04441	2.78338	14.9041	3.49224
Ga0214976_100050848	tRNA threonylcarbamoyladenosine biosynthesis protein TsaE	KO:K06925	30.3289	17.0249	17.151	15.5796	13.5244	1.65891	0	7.09258	1.29542
Ga0214976_100050849	NAD(P)H-hydrate epimerase	KO:K17759	23.8991	11.6958	14.3122	13.5007	13.4733	1.00995	0.58929	4.81622	0.887241
Ga0214976_10005085	hypothetical protein	KO:K09762	20.0153	9.44371	15.9875	11.6449	7.12206	0.261485	0.534002	3.91287	0.178667
Ga0214976_100050850	holo-[acyl-carrier protein] synthase	KO:K00997	10.5364	5.21334	7.29907	3.52037	4.9213	0.632396	0	5.09557	0.864202
Ga0214976_100050852	glutamate formiminotransferase/formiminotetrahydrofolate cyclodeaminase	KO:K13990	22.2623	12.6237	27.3685	15.2747	13.0187	0.37176	0.759205	7.70266	1.52409
Ga0214976_100050853	imidazolonepropionase	KO:K01468	19.7779	9.33262	20.1624	9.99451	8.91307	0.371463	0.379299	2.99309	1.14215
Ga0214976_100050854	glutamate formiminotransferase	KO:K00603	17.0248	6.66881	10.7579	10.9024	4.96992	0.383186	0.521693	4.11673	0.698192
Ga0214976_100050855	histidine ammonia-lyase	KO:K01745	6.6622	1.6482	1.87103	8.26776	9.33525	0.599798	0	0	0
Ga0214976_10005086	2-phospho-L-lactate transferase/gluconeogenesis factor (CofD/UPF0052 family)	COG0391	31.2137	17.8896	22.0514	24.1076	13.6498	2.08496	0.811027	5.94276	1.89948
Ga0214976_10005087	UPF0042 nucleotide-binding protein	KO:K06958	28.2418	17.4059	18.3172	19.2504	11.5016	1.43803	3.42619	7.72469	0.818812
Ga0214976_10005088	molybdopterin biosynthesis enzyme MoaB	COG0521	41.3584	24.0624	22.8727	25.7363	16.1633	2.17361	2.95929	14.0112	2.77234
Ga0214976_10005089	cyclic pyranopterin phosphate synthase	KO:K03637	39.4484	18.911	22.0692	29.8581	18.7141	1.16361	0	12.3225	3.81632
Ga0214976_10008651	flavorubredoxin	COG0426	52.5416	33.1171	51.5432	40.4071	16.6012	5.23624	0	17.4123	10.3359
Ga0214976_100086510	fumarate hydratase subunit alpha	KO:K01677	10.2413	6.10853	6.61527	8.39571	3.92928	0.137705	0	1.90212	0.188181
Ga0214976_100086511	fumarate hydratase subunit beta	KO:K01678	23.6456	12.5286	14.8408	12.7164	7.71311	0.594689	0.809646	7.30171	0
Ga0214976_100086512	NTE family protein	KO:K07001	34.1624	23.0793	25.3282	24.9784	17.6103	2.57976	0.554565	10.0026	2.04101
Ga0214976_100086513	glycerol-3-phosphate acyltransferase PlsY	COG0344	60.0399	36.1836	55.5183	53.4578	24.0129	3.88201	1.21966	7.33294	3.8087
Ga0214976_100086514	succinyl-diaminopimelate desuccinylase	KO:K01439	43.8657	31.003	39.1912	40.9579	21.5777	3.05961	0.781039	15.8484	2.48254
Ga0214976_100086515	sodium/pantothenate symporter	KO:K14392	17.9551	13.0075	16.4021	16.0411	12.7112	0.855594	1.27075	4.65569	0.956631
Ga0214976_100086516	uncharacterized membrane protein YhdT	COG3924	35.0686	7.04072	16.1021	11.5959	17.021	1.31234	0	4.02829	1.79338
Ga0214976_100086517	hypothetical protein	Hypo-rule applied	38.9174	29.427	17.7751	29.2809	23.4392	1.38305	3.01275	17.8305	5.79605
Ga0214976_100086518	3-methyl-2-oxobutanoate hydroxymethyltransferase	KO:K00606	36.1249	26.958	22.5269	28.1724	20.8531	2.04381	0.556513	16.9386	6.14454
Ga0214976_100086519	fructose 1,6-bisphosphate aldolase/phosphatase	KO:K01622	149.885	114.052	111.691	128.75	47.6157	7.80662	1.72353	28.4153	8.93819
Ga0214976_10008652	hypothetical protein	Hypo-rule applied	18.6312	12.9464	21.9341	16.1648	6.45647	2.80013	1.27075	2.86504	2.12585
Ga0214976_100086520	adenosylmethionine-8-amino-7-oxononanoate aminotransferase	COG0161	61.4846	79.5401	42.1908	88.3968	50.5677	12.5073	9.86459	56.7932	15.7952
Ga0214976_100086521	hypothetical protein	KO:K07080	98.2667	207.103	97.5013	216.527	46.8969	20.1417	11.8939	132.404	37.4734
Ga0214976_100086522	TRAP-type uncharacterized transport system fused permease subunit	COG4666	35.8274	60.3563	48.2746	68.235	11.1849	3.42585	3.86	30.4596	4.92376
Ga0214976_100086523	acetate CoA/acetoacetate CoA-transferase alpha subunit	KO:K01034	9.95021	14.2539	7.69161	16.2955	4.38084	1.68884	0	23.7166	4.61577
Ga0214976_100086524	3-oxoacid CoA-transferase subunit B/acetate CoA/acetoacetate CoA-transferase beta subunit	KO:K01029,KO:K01035	9.90708	15.5783	11.5398	13.3722	5.6704	1.34521	1.37359	12.7747	2.06809
Ga0214976_100086525	acetyl-CoA C-acetyltransferase	KO:K00626	15.4724	23.8425	29.4922	27.0416	8.92263	1.27761	2.00702	16.9688	4.02905
Ga0214976_100086526	DNA-binding MurR/RpiR family transcriptional regulator	COG1737	117.68	63.7543	112.831	93.2339	38.8542	6.65711	0	18.5186	6.25439
Ga0214976_100086527	2-aminoadipate transaminase	KO:K05825	98.7334	61.3692	90.6554	75.2072	39.0353	6.42189	3.13188	13.6809	6.1562
Ga0214976_100086528	outer membrane protein TolC	COG1538	100.879	83.774	92.308	90.2142	46.1307	8.48558	1.84353	36.9922	10.7325
Ga0214976_100086529	HlyD family secretion protein	KO:K02005	75.6723	57.7516	67.1231	52.9766	37.9262	7.56244	1.64736	20.892	7.57862
Ga0214976_10008653	methylmalonyl-CoA mutase N-terminal domain/subunit	KO:K01848	123.981	87.3112	101.6	99.8707	56.3482	5.81112	1.41279	25.96	8.88659
Ga0214976_100086530	putative ABC transport system ATP-binding protein	KO:K02003	59.3206	51.3479	60.5831	45.7617	27.1268	5.47776	4.06786	15.2857	5.67094
Ga0214976_100086531	putative ABC transport system permease protein	KO:K02004	46.4094	38.4683	37.8634	43.1179	21.6126	2.55634	2.32024	16.7835	5.56352
Ga0214976_100086532	hypothetical protein	Hypo-rule applied	42.9295	30.1911	28.9761	30.9775	16.8409	2.49701	2.03975	11.4971	2.04738
Ga0214976_100086533	mRNA interferase MazF	KO:K07171	73.2419	59.5364	45.4745	54.0656	45.7847	4.57599	5.34002	19.5644	7.14666
Ga0214976_100086534	thiamine phosphate synthase YjbQ (UPF0047 family)	COG0432	28.8139	20.975	22.2233	22.8191	14.63	1.78103	1.2124	6.83371	1.21694
Ga0214976_100086535	type IV pilus assembly protein PilB	KO:K02652	139.059	167.345	121.665	159.47	66.1054	8.03673	7.57502	49.1801	12.0152
Ga0214976_100086536	twitching motility protein PilT	KO:K02669	100.884	123.728	90.888	116.823	48.4251	6.41359	3.27444	40.8677	8.92102
Ga0214976_10008654	methylmalonyl-CoA mutase C-terminal domain/subunit	KO:K01849	54.4507	28.1268	22.8704	32.2438	48.2656	2.4994	1.13428	11.508	7.96964
Ga0214976_10008655	lactoylglutathione lyase/methylmalonyl-CoA/ethylmalonyl-CoA epimerase	KO:K01759,KO:K05606	92.5149	49.8011	38.954	57.3268	41.2269	1.41903	3.47753	24.828	5.81756
Ga0214976_10008656	acetyl-CoA carboxylase carboxyltransferase component	COG4799	106.982	75.0961	59.6042	77.004	55.3728	3.80654	3.04851	25.087	5.09985
Ga0214976_10008657	oxaloacetate decarboxylase gamma subunit	pfam04277	51.9585	35.4642	22.9827	37.3551	18.9598	2.63127	10.7471	14.8075	0.799062
Ga0214976_10008658	pyruvate carboxylase subunit B	KO:K01960	110.193	75.2987	61.8201	66.0278	42.4462	6.36348	3.71298	14.6498	2.48458
Ga0214976_10008659	oxaloacetate decarboxylase beta subunit	KO:K01572	175.551	124.69	125.246	152.767	56.2752	6.43566	2.96774	30.3487	8.08542
Ga0214976_10010281	ribonuclease HII	KO:K03470	19.9892	14.0104	19.4995	20.1529	13.1473	1.68945	2.58763	5.3479	0.865771
Ga0214976_100102811	glucokinase	KO:K00845	162.798	81.7465	190.277	100.351	73.0698	18.5598	8.0644	47.2732	24.2837
Ga0214976_100102812	Na+-driven multidrug efflux pump	COG0534	39.372	23.4417	38.3937	28.9324	18.5019	2.48811	1.35499	8.40113	1.81341
Ga0214976_100102813	rubrerythrin	COG1633	1099.57	690.172	800.235	855.758	296.133	35.6905	9.9845	198.097	52.1136
Ga0214976_100102814	protease I	KO:K05520	1198.32	823.829	917.081	897.77	391.44	54.8342	33.5064	270.863	89.0946
Ga0214976_100102815	2-oxoglutarate ferredoxin oxidoreductase subunit gamma	KO:K00177	82.0745	53.3897	35.8318	67.5763	11.6305	2.34857	0.87204	15.7288	5.83535
Ga0214976_100102816	2-oxoglutarate ferredoxin oxidoreductase subunit beta	KO:K00175	135.947	98.8984	71.389	115.101	39.0743	2.62572	4.51555	34.0419	10.0091
Ga0214976_100102817	2-oxoglutarate ferredoxin oxidoreductase subunit alpha	KO:K00174	126.449	97.6941	68.1983	118.289	43.4607	3.3713	4.58989	32.4562	8.09725
Ga0214976_100102818	2-oxoglutarate ferredoxin oxidoreductase subunit delta	KO:K00176	243.587	110.088	73.2036	159.259	65.6723	2.92119	3.97709	58.2838	11.9759
Ga0214976_100102819	predicted thioesterase	COG5496	347.659	166.217	107.2	214.021	106.793	2.85899	7.00632	88.1968	10.5488
Ga0214976_10010282	ribosome biogenesis GTPase A	KO:K14540	32.9226	21.4763	30.5947	26.9754	22.0589	2.26769	0.578882	10.4412	1.74314
Ga0214976_100102820	thiamine thiazole synthase	KO:K03146	46.4558	26.4456	15.1902	32.231	31.3851	1.34435	4.27065	7.56533	0.816499
Ga0214976_100102821	hypothetical protein	Hypo-rule applied	24.3315	10.3601	12.3488	7.31379	6.2235	0.599798	0	5.52333	0
Ga0214976_100102822	ribonuclease HI	KO:K03469	17.6827	4.93825	5.32558	11.3138	10.4886	0.898539	0	7.75718	0
Ga0214976_100102823	TRAP-type C4-dicarboxylate transport system permease large subunit	COG1593	42.331	22.0421	29.9621	27.6146	16.3916	1.44435	0	5.81899	3.70085
Ga0214976_100102824	C4-dicarboxylate transporter DctQ subunit	KO:K11689	79.3054	40.4339	50.7718	40.5687	30.247	2.67217	1.98439	15.659	3.65166
Ga0214976_100102825	TRAP-type C4-dicarboxylate transport system substrate-binding protein	COG1638	146.627	102.269	130.589	115.684	72.6868	8.7777	5.97525	38.3428	11.0725
Ga0214976_10010283	signal peptidase I	KO:K03100	18.3242	7.67332	11.7646	12.4356	12.527	1.8397	2.81776	2.64705	0.628511
Ga0214976_100102832	homoserine O-acetyltransferase	KO:K00641	16.3277	11.7233	14.8386	13.7404	8.2999	0.853242	1.74248	3.43752	1.02025
Ga0214976_100102833	O-acetylhomoserine (thiol)-lyase	KO:K01740	8.45323	6.72899	8.54405	6.92392	7.05783	0.544166	0.37043	1.04396	0.619693
Ga0214976_100102834	hypothetical protein	KO:K07045	70.4605	35.7699	65.5009	47.4993	25.9028	4.1607	0	12.1329	3.60102
Ga0214976_100102835	5,10-methylenetetrahydrofolate reductase	COG0685	62.1776	38.6089	59.7663	43.4744	29.4882	2.29912	3.13016	17.6431	3.49096
Ga0214976_100102836	5-methyltetrahydrofolate--homocysteine methyltransferase	KO:K00548	17.1036	12.4596	14.7909	14.7236	12.927	1.06442	0.592843	5.79203	2.04965
Ga0214976_100102837	hypothetical protein	Hypo-rule applied	15.2848	11.3283	14.6022	15.0172	6.55424	0.664919	0	2.4492	0.908647
Ga0214976_100102838	dCTP deaminase	KO:K01494	15.0673	11.7086	20.8117	20.8062	3.56303	0.98112	0	2.2587	1.6089
Ga0214976_100102839	deoxyribonuclease V	KO:K05982	37.0142	20.2409	33.3638	28.2593	9.94083	1.04516	0.71147	4.41122	0
Ga0214976_10010284	pilin/secretion family protein with methylation motif	pfam07963	15.3589	8.026	11.0233	10.5716	14.4045	0.757229	0	1.74326	0.689862
Ga0214976_100102840	large subunit ribosomal protein L7/L12	KO:K02935	252.578	161.198	234.027	194.811	94.5235	11.9423	7.50414	57.101	14.646
Ga0214976_100102841	large subunit ribosomal protein L10	KO:K02864	280.655	166.346	239.036	196.645	107.598	12.2255	13.3751	69.3577	8.35342
Ga0214976_100102842	large subunit ribosomal protein L1	KO:K02863	273.373	190.371	258.074	202.622	181.954	17.3722	4.68568	67.159	17.693
Ga0214976_100102843	large subunit ribosomal protein L11	KO:K02867	168.186	112.209	146.559	136.589	90.1969	9.85645	13.4192	51.6853	19.0816
Ga0214976_100102844	transcriptional antiterminator NusG	KO:K02601	98.3399	60.1982	73.2443	82.5107	66.297	7.27255	7.63814	39.2255	7.95066
Ga0214976_100102845	preprotein translocase subunit SecE	KO:K03073	30.5672	7.52948	8.37647	10.1687	11.6092	0	2.61133	13.2469	4.3685
Ga0214976_100102847	large subunit ribosomal protein L33	KO:K02913	279.463	183.328	185.632	131.247	127.624	11.7142	6.37936	66.5209	6.40322
Ga0214976_10010285	indolepyruvate ferredoxin oxidoreductase beta subunit	KO:K00180	77.0664	36.4615	57.4287	50.4538	33.957	3.94796	1.69736	13.8724	4.25928
Ga0214976_10010286	indolepyruvate ferredoxin oxidoreductase alpha subunit	KO:K00179	98.9974	64.0093	92.5122	79.3113	37.182	5.63339	2.30089	19.1653	8.89585
Ga0214976_10010287	acyl-CoA thioester hydrolase	KO:K07107	64.7662	28.8672	50.7997	38.5377	24.8488	2.25396	0	11.6752	2.31012
Ga0214976_10010288	hypothetical protein	KO:K06929	27.8988	13.9723	21.0102	16.5475	10.6532	3.01169	0	5.67278	0.374149
Ga0214976_10010289	hypothetical protein	Hypo-rule applied	43.136	19.0825	31.4646	21.7446	14.1857	1.21526	1.24089	8.39315	1.24553
Ga0214976_10010691	pyrroline-5-carboxylate reductase	COG0345	207.941	147.578	135.199	156.349	84.3196	10.5997	9.62069	62.9033	16.7382
Ga0214976_100106910	uncharacterized protein DUF3798	pfam12683	504.241	304.666	313.021	310.675	325.623	28.3831	27.4879	172.899	39.5867
Ga0214976_100106911	simple sugar transport system ATP-binding protein	KO:K02056	44.2573	31.8617	41.5737	33.2591	23.4348	3.90279	2.65674	15.6403	3.16051
Ga0214976_100106912	simple sugar transport system permease protein	KO:K02057	42.656	21.3546	37.5473	24.2397	19.0453	2.00238	1.36308	9.98793	1.67222
Ga0214976_100106913	simple sugar transport system permease protein	KO:K02057	57.267	39.0762	59.0668	43.8001	30.184	3.70239	5.18468	13.8811	3.32482
Ga0214976_100106914	hypothetical protein	Hypo-rule applied	62.65	29.9357	56.8638	30.9257	31.5237	2.73433	1.24089	16.0869	4.15178
Ga0214976_100106915	uncharacterized protein DUF3798	pfam12683	58.8246	42.6076	45.2258	50.8748	28.0005	2.87188	4.04478	12.0832	4.19524
Ga0214976_100106916	DNA-binding GntR family transcriptional regulator	COG1802	152.489	78.131	159.206	95.2685	18.6262	3.31407	5.26398	20.7693	3.01924
Ga0214976_100106917	pyruvate dehydrogenase E1 component alpha subunit	KO:K00161	49.3228	29.5374	50.4787	29.4067	9.38362	2.5322	1.97	6.38474	2.30693
Ga0214976_100106918	pyruvate dehydrogenase E1 component beta subunit	KO:K00162	29.1933	25.3719	42.5589	22.8647	7.43753	3.10614	1.46385	3.30039	1.63258
Ga0214976_100106919	TRAP-type C4-dicarboxylate transport system substrate-binding protein	COG1638	44.3954	33.7714	81.8967	32.3819	15.8439	4.86562	6.34247	8.81816	2.97089
Ga0214976_10010692	urocanate hydratase	KO:K01712	34.3255	29.815	29.8252	31.8176	22.6008	2.40747	0.702358	8.97337	2.9766
Ga0214976_100106920	C4-dicarboxylate transporter DctQ subunit	KO:K11689	23.8727	12.6176	25.0025	18.8738	8.44307	0.813712	1.66176	2.80994	1.38998
Ga0214976_100106921	C4-dicarboxylate transporter DctM subunit	KO:K11690	16.0368	10.4784	12.8144	10.4576	7.51079	1.17628	0.369566	3.95781	0.494598
Ga0214976_100106922	dihydrolipoamide dehydrogenase	KO:K00382	314.591	233.014	230.183	246.982	125.586	14.2738	11.2508	98.3897	23.2702
Ga0214976_100106923	lipoic acid synthetase	KO:K03644	178.533	129.881	143.297	154.611	60.2994	8.18884	5.93403	46.826	19.4931
Ga0214976_100106924	pyruvate dehydrogenase E1 component alpha subunit	KO:K00161	483.657	372.909	451.625	363.258	226.616	32.5179	21.31	155.31	36.3127
Ga0214976_100106925	pyruvate dehydrogenase E1 component beta subunit	KO:K00162	204.18	179.151	180.298	196.851	83.9821	14.2166	7.31923	63.2574	23.0194
Ga0214976_100106926	4-hydroxyphenylpyruvate dioxygenase-like putative hemolysin	COG3185	57.3458	55.1328	29.1575	48.2903	36.4929	3.33822	5.84339	40.0724	5.21355
Ga0214976_100106927	predicted polyphosphate/ATP-dependent NAD kinase	COG3199	250.579	162.97	224.151	161.23	137.091	21.441	8.04727	88.8491	26.7662
Ga0214976_100106928	pyruvate dehydrogenase E2 component (dihydrolipoamide acetyltransferase)	KO:K00627	78.9944	49.76	44.4502	45.4081	35.3796	2.86133	0	34.6928	6.12592
Ga0214976_100106929	cell wall-associated NlpC family hydrolase	COG0791	17.9365	14.5801	12.8584	16.2762	15.0363	0.429376	0.876867	5.43671	0.586765
Ga0214976_10010693	DNA-binding IclR family transcriptional regulator	COG1414	73.0449	49.0257	60.7758	55.3287	49.5558	5.36807	5.80374	8.72341	1.07879
Ga0214976_10010694	polar amino acid transport system permease protein	KO:K02029	31.6394	28.991	31.4098	31.5522	14.7028	3.66753	1.36178	6.90812	2.27813
Ga0214976_10010695	polar amino acid transport system ATP-binding protein	KO:K02028	40.1281	33.2265	29.0578	36.5055	18.865	2.93997	1.89599	13.5366	3.17181
Ga0214976_10010696	polar amino acid transport system permease protein	KO:K02029	73.7708	53.8529	51.5269	58.2579	26.3259	8.39898	7.1468	18.5301	4.54324
Ga0214976_10010697	polar amino acid transport system substrate-binding protein	KO:K02030	424.443	230.697	233.613	221.547	180.528	22.5112	21.3674	144.89	37.262
Ga0214976_10010698	exopolysaccharide biosynthesis protein/exopolysaccharide biosynthesis protein	COG4632,COG4632	30.2683	23.8776	29.5334	28.1111	13.5485	2.11565	0.540071	7.30586	3.1622
Ga0214976_10010699	Mg/Co/Ni transporter MgtE	COG2239	52.139	28.6586	52.8701	35.2061	29.5616	4.54133	3.49972	12.033	5.38631
Ga0214976_10013421	pyrimidine-nucleoside phosphorylase	KO:K00756	15.4799	9.48051	10.5744	11.5466	10.2512	0.351278	0.717377	5.25654	1.56013
Ga0214976_100134210	uncharacterized MnhB-related membrane protein	COG1563	74.3924	36.7381	60.4537	39.2973	31.1507	2.48457	10.1479	9.53314	2.82942
Ga0214976_100134211	multisubunit Na+/H+ antiporter MnhB subunit	COG2111	84.3958	39.7355	68.2781	48.389	28.052	3.02798	5.30032	17.9251	5.91127
Ga0214976_100134212	multicomponent Na+:H+ antiporter subunit B	KO:K05566	74.5086	31.069	49.5241	38.3379	18.3304	1.88439	1.92414	7.59178	7.40345
Ga0214976_100134213	multicomponent Na+:H+ antiporter subunit C	KO:K05567	60.5667	24.7482	49.3737	25.245	26.9655	0.670668	1.36963	13.8959	0.916503
Ga0214976_100134214	multicomponent Na+:H+ antiporter subunit D	KO:K05568	78.3259	37.7092	61.7928	49.6213	26.912	2.38842	1.52425	15.4646	3.77389
Ga0214976_100134215	hypothetical protein	Hypo-rule applied	73.0031	50.7691	67.6996	50.8357	36.2916	2.72987	1.39373	13.3548	1.39894
Ga0214976_100134216	membrane-bound hydrogenase subunit mbhJ	KO:K18023	65.6386	42.3201	67.2582	62.4678	22.1941	4.4002	0	19.6972	3.67468
Ga0214976_100134217	membrane-bound hydrogenase subunit beta	KO:K18017	119.4	79.2046	122.281	106.288	30.4609	7.0457	9.59245	22.6102	4.96005
Ga0214976_100134218	membrane-bound hydrogenase subunit alpha	KO:K18016	99.6171	70.817	93.22	74.4589	38.71	6.61141	4.62918	20.2216	4.51742
Ga0214976_100134219	formate hydrogenlyase subunit 4	COG0650	103.183	73.5452	98.7161	97.5884	40.0431	4.91171	1.9106	20.4613	5.75324
Ga0214976_100134220	formate hydrogenlyase subunit 6/NADH:ubiquinone oxidoreductase subunit I	COG1143	115.866	90.227	126.863	110.706	44.0806	5.18439	1.17639	26.5229	3.93597
Ga0214976_100134221	glutamyl-tRNA synthetase	KO:K01885	118.551	84.678	109.309	102.473	48.9656	7.35563	6.15343	24.8907	10.8996
Ga0214976_100134222	DNA polymerase-1	KO:K02335	74.0812	50.8805	67.9407	68.3556	34.9585	4.38671	2.58596	14.2634	7.41609
Ga0214976_100134223	ubiquinone biosynthesis protein	KO:K03688	48.9007	30.7495	42.4739	40.0344	20.0956	3.67785	1.27845	6.30521	2.03178
Ga0214976_100134224	foldase protein PrsA	KO:K07533	44.7428	33.071	40.0121	39.3587	25.1749	2.60136	2.86056	14.5112	5.05889
Ga0214976_100134227	DNA polymerase V	KO:K03503	10.4647	6.99166	7.77815	6.92441	4.62	0.296839	1.2124	2.05011	1.62258
Ga0214976_100134228	DNA polymerase V	KO:K03502	17.2287	9.5784	14.9344	11.2209	7.67186	1.01666	0.754983	1.70219	2.02082
Ga0214976_100134229	repressor LexA	KO:K01356	11.4118	5.20036	5.02588	6.16902	6.50117	0.358033	1.46234	3.297	0.733907
Ga0214976_10013423	SsrA-binding protein	KO:K03664	87.9722	53.0592	61.9762	63.1719	62.6087	9.14627	3.11307	25.7353	6.59662
Ga0214976_100134232	DNA-binding FrmR family transcriptional regulator	COG1937	67.5649	41.3922	54.0745	40.8856	26.5548	3.41234	2.78746	10.9981	6.99472
Ga0214976_100134233	small subunit ribosomal protein S2	KO:K02967	59.0437	36.1444	39.8936	49.3231	44.137	2.60714	5.04406	19.5857	3.5628
Ga0214976_10013424	uncharacterized membrane protein/uncharacterized membrane protein	COG1470,COG1470	44.4379	22.1384	28.3817	31.7421	35.109	3.00771	1.91948	11.4683	2.9542
Ga0214976_10013425	ABC-2 type transport system ATP-binding protein	KO:K01990	64.0325	37.7389	39.7253	41.3695	51.4941	3.37097	5.09938	19.2576	5.97153
Ga0214976_10013426	ABC-2 type transport system permease protein	KO:K01992	65.0008	32.092	55.0275	42.8806	28.9612	2.48104	1.01335	11.1379	2.20381
Ga0214976_10013427	multicomponent Na+:H+ antiporter subunit E	KO:K05569	84.752	39.7818	77.8028	60.1733	34.0188	1.90755	7.79118	23.0554	4.56186
Ga0214976_10013428	multicomponent Na+:H+ antiporter subunit F	KO:K05570	90.0435	33.8095	62.0211	49.0607	38.0271	2.74868	3.74222	14.7651	1.87811
Ga0214976_10013429	multicomponent Na+:H+ antiporter subunit G	KO:K05571	65.1308	32.0121	45.5927	28.9329	32.5434	5.01826	0	12.9969	4.28607
Ga0214976_10014621	adenylosuccinate synthase	KO:K01939	29.0457	23.2066	31.4544	26.134	13.1024	1.77722	1.14613	5.59881	2.04519
Ga0214976_100146210	hypothetical protein	Hypo-rule applied	75.4324	56.3499	69.65	72.9883	28.111	3.45087	1.48365	9.89572	3.64026
Ga0214976_100146211	septum formation protein	KO:K06287	69.6882	52.3654	75.5811	72.6484	39.2193	3.63628	3.90841	14.099	3.92302
Ga0214976_100146212	undecaprenyl-diphosphatase	KO:K06153	125.128	70.992	115.386	94.167	46.7586	4.83615	5.3871	18.8934	5.00671
Ga0214976_100146213	ribonuclease J	KO:K12574	184.579	146.146	162.475	154.155	81.1195	11.2394	7.02092	41.7043	12.3777
Ga0214976_100146214	fructose/tagatose bisphosphate aldolase	COG0191	248.033	196.875	222.415	208.077	133.702	20.3242	18.3225	73.5567	19.1416
Ga0214976_100146217	hypothetical protein	Hypo-rule applied	249.404	190.723	231.093	227.345	114.242	22.2523	5.68042	65.1026	14.5709
Ga0214976_100146218	N-acyl-D-amino-acid deacylase	KO:K06015	111.669	87.402	112.174	102.384	51.3673	8.84973	2.50515	30.056	9.33963
Ga0214976_100146219	cystathionine beta-lyase	KO:K14155	57.457	37.9407	52.5804	47.2941	24.7837	1.91085	0.821542	12.2711	3.02359
Ga0214976_10014622	hypothetical protein	KO:K09798	37.2049	28.646	29.6844	30.0609	18.865	2.34201	1.00691	11.9185	3.53737
Ga0214976_100146220	HEPN domain-containing protein/predicted nucleotidyltransferase	COG2250,COG1669	213.314	96.9616	187.859	133.237	77.5052	16.5993	14.2375	88.2747	26.9937
Ga0214976_100146221	small-conductance mechanosensitive channel	COG0668	185.323	114.93	167.018	118.291	69.4425	9.91893	6.53431	31.4288	7.14175
Ga0214976_100146222	S-adenosylmethionine decarboxylase	KO:K01611	392.4	162.773	377.146	199.515	184.785	25.5426	17.3876	135.247	41.8864
Ga0214976_100146223	predicted RNase H-like HicB family nuclease	COG1598	256.482	154.633	214.964	188.431	116.273	10.8664	11.0956	50.0323	20.418
Ga0214976_100146224	predicted RNA binding protein YcfA (HicA-like mRNA interferase family)	COG1724	128.232	91.9613	140.715	92.943	58.5064	10.2521	2.09367	23.6019	7.70549
Ga0214976_100146226	bifunctional DNA-binding transcriptional regulator/antitoxin component of YhaV-PrlF toxin-antitoxin module	COG2002	58.4601	30.7595	54.1544	33.5814	19.4735	3.75357	0	5.40083	0
Ga0214976_100146227	hypothetical protein	Hypo-rule applied	50.5095	29.8506	43.8953	41.9637	20.0057	2.30016	3.31578	10.2792	0.924496
Ga0214976_100146228	predicted transposase YdaD	COG5464	36.5353	21.7331	35.9464	26.8276	12.3465	1.75355	1.02317	7.78557	3.08099
Ga0214976_10014623	carboxyl-terminal processing protease	KO:K03797	181.604	125.326	172.513	145.127	77.3821	13.2902	9.37246	53.2681	19.0764
Ga0214976_10014624	murein DD-endopeptidase MepM/ murein hydrolase activator NlpD	COG0739	107.366	68.9739	104.346	79.4145	45.7698	6.7792	0.758599	27.793	6.09149
Ga0214976_10014625	cell division transport system permease protein	KO:K09811	116.33	75.2874	100.682	101.817	33.1204	3.81727	2.15051	19.0911	6.29577
Ga0214976_10014626	cell division transport system ATP-binding protein	KO:K09812	315.577	238.121	282.55	243.654	129.422	15.738	4.10298	83.2552	20.5916
Ga0214976_10014627	transketolase	KO:K00615	119.45	89.0906	116.828	118.56	52.5909	6.88089	3.01116	26.3073	6.88442
Ga0214976_10014628	transketolase	KO:K00615	72.1743	55.609	58.7764	65.8947	43.9814	4.10203	5.02627	25.8123	3.55024
Ga0214976_10014629	polysaccharide pyruvyl transferase WcaK-like protein	COG2327	69.8009	41.7598	54.1876	45.8119	35.6798	3.77147	2.71837	14.8114	2.72854
Ga0214976_10015911	hypothetical protein	KO:K07053	16.8583	10.0596	16.2322	12.2687	9.49609	1.43817	1.068	3.31089	0.536
Ga0214976_100159110	large subunit ribosomal protein L13	KO:K02871	364.041	187.105	285.235	262.148	147.812	24.2307	8.70045	76.6251	19.2854
Ga0214976_100159111	small subunit ribosomal protein S9	KO:K02996	1353.5	695.474	1005.69	693.273	686.208	87.7861	58.9566	237.363	89.3695
Ga0214976_100159112	AcrR family transcriptional regulator	COG1309	28.2978	9.2989	12.5747	16.9648	7.007	0.831149	0	8.13211	1.13581
Ga0214976_100159113	outer membrane protein TolC	COG1538	44.1045	19.3467	27.1011	27.3305	19.6852	2.2679	3.91895	11.2454	3.45681
Ga0214976_100159114	HlyD family secretion protein	KO:K02005	29.3909	14.2473	16.9034	17.7942	12.0631	1.31424	1.23874	10.4732	2.48674
Ga0214976_100159115	HAE1 family hydrophobic/amphiphilic exporter-1	KO:K03296	8.59931	5.23894	6.73572	6.28032	4.95935	0.674773	0	3.10687	0.614742
Ga0214976_100159118	outer membrane protein assembly factor BamB/outer membrane protein assembly factor BamB	COG1520,COG1520	148.656	72.1201	80.2726	94.1943	62.7343	5.19752	9.53124	32.4779	7.39259
Ga0214976_100159119	leader peptidase (prepilin peptidase)/N-methyltransferase	KO:K02654	78.7008	22.9274	27.4915	31.835	36.0348	1.0456	0	20.2888	3.06187
Ga0214976_10015912	FdhD protein	KO:K02379	7.50299	4.32011	6.76487	3.3462	3.35844	0.323674	0	0.372575	0
Ga0214976_100159120	hypothetical protein	Hypo-rule applied	48.3592	22.4479	28.3747	22.3495	22.4224	2.26072	1.08631	8.26605	0.908647
Ga0214976_100159121	phosphotransferase system enzyme I (PtsI)	KO:K08483	27.3775	15.6605	23.6635	16.5537	12.6499	0.812765	0.553274	5.14557	1.20324
Ga0214976_100159122	2-phosphosulfolactate phosphatase	KO:K05979	31.4935	13.6785	16.7529	20.6764	14.5115	1.11885	3.26416	7.72735	2.40267
Ga0214976_100159123	hypothetical protein	Hypo-rule applied	59.1922	29.7536	46.6561	31.7636	26.5889	3.32047	0	11.3002	2.56473
Ga0214976_10015913	threonine aldolase	KO:K01620	21.9748	9.28684	16.1717	15.0625	9.39579	0.565957	0.924634	4.16936	1.7015
Ga0214976_10015914	PmbA protein	KO:K03592	15.0695	7.00453	9.91865	11.4773	6.80017	0.422823	0.345394	3.50426	0.462248
Ga0214976_10015915	N-acetylmuramoyl-L-alanine amidase	KO:K01448	12.5909	6.19325	10.5821	7.65729	6.91676	0.518476	0	2.55775	0.607307
Ga0214976_10015916	sporulation and spore germination protein	pfam10646	17.699	8.05674	10.0606	6.0233	7.60541	0.916227	0	2.95302	0.250415
Ga0214976_10015917	XTP/dITP diphosphohydrolase	KO:K02428	28.3317	15.8618	23.6331	19.1559	11.0859	0.971292	0	4.02493	1.59279
Ga0214976_10015919	nicotinate phosphoribosyltransferase	KO:K00763	70.9765	29.0242	50.4803	36.2147	23.6451	2.47576	0.919269	17.3579	4.45975
Ga0214976_10016241	flagellin	KO:K02406	47.0705	34.4698	36.1641	35.2841	23.9467	3.00563	4.38434	15.3216	2.34706
Ga0214976_100162410	hypothetical protein	Hypo-rule applied	430.497	248.453	365.506	329.372	213.913	25.8017	33.0617	92.0114	33.1854
Ga0214976_100162411	uncharacterized protein (DUF3084 family)/uncharacterized protein (DUF3084 family)	COG4372,COG4372	30.9162	19.6312	24.9473	27.1829	15.1425	2.04312	0.794753	6.71943	1.7284
Ga0214976_100162412	4-aminobutyrate aminotransferase-like enzyme	COG0160	104.578	58.9447	124.587	73.3784	44.1609	4.59655	1.73834	19.0084	3.37336
Ga0214976_100162413	hypothetical protein	KO:K06940	30.9124	17.3203	20.8232	19.6342	11.8601	0.457213	6.53602	5.2629	0
Ga0214976_100162414	flagellar P-ring protein precursor FlgI	KO:K02394	99.5923	91.277	87.8458	88.8601	46.3549	8.93503	3.35578	22.9342	7.1577
Ga0214976_100162415	flagellar L-ring protein precursor FlgH	KO:K02393	18.764	9.29465	10.4791	10.5142	12.0736	0.809467	0	5.59057	0
Ga0214976_100162416	flagella basal body P-ring formation protein FlgA	KO:K02386	12.5012	7.07349	11.9542	7.60196	8.55816	0.507572	0	1.75277	0.346812
Ga0214976_100162417	flagellar basal-body rod protein FlgG	KO:K02392	51.0082	37.8828	53.3228	45.2343	32.4354	4.26607	1.80251	16.2558	1.80925
Ga0214976_100162418	flagellar basal-body rod protein FlgG	KO:K02392	26.0253	24.9372	28.0805	29.9273	15.2287	1.50531	0	6.23786	2.2628
Ga0214976_100162419	rod shape-determining protein MreB	KO:K03569	28.312	20.2192	25.4711	26.068	13.8512	2.33612	1.36308	7.93912	0.760102
Ga0214976_10016242	hypothetical protein	COG2604	36.6417	23.188	33.7266	25.5212	12.6407	1.95832	0.74405	7.23437	2.80062
Ga0214976_100162420	tRNA U38,U39,U40 pseudouridine synthase TruA	COG0101	21.3151	7.48188	16.0927	13.2193	5.94758	1.57632	2.34119	1.64952	1.3708
Ga0214976_100162421	energy-coupling factor transport system permease protein	KO:K16785	12.5261	7.65064	14.0364	9.87652	9.66482	1.00311	2.34119	3.95884	0.783317
Ga0214976_100162422	energy-coupling factor transport system ATP-binding protein	KO:K16787	5.68837	5.04429	3.34031	1.89234	1.85178	0	0	1.64344	0
Ga0214976_10016243	flagellar hook-associated protein 3 FlgL	KO:K02397	18.6963	14.633	16.2654	14.7003	9.72583	1.00273	1.24647	4.41618	0.655356
Ga0214976_10016244	flagellar hook-associated protein 1 FlgK	KO:K02396	16.9014	11.5995	12.9249	13.3741	7.18956	0.657671	0.38374	4.75849	1.5407
Ga0214976_10016245	hypothetical protein	Hypo-rule applied	5.48772	4.63925	6.23873	6.14493	1.76859	0.454534	0	1.04641	0.310573
Ga0214976_10016246	negative regulator of flagellin synthesis FlgM	KO:K02398	8.89405	4.43643	3.13365	5.54768	2.17151	0.837128	0	2.89081	3.43194
Ga0214976_10016247	predicted amidophosphoribosyltransferase	COG1040	139.089	62.8438	130.65	83.5309	40.7765	5.96259	1.47597	35.357	16.0495
Ga0214976_10016248	S-adenosylmethionine synthetase	KO:K00789	45.5553	36.4211	32.1506	39.206	26.6848	3.88193	3.56744	11.8413	4.77438
Ga0214976_10016249	ribosomal protein S18 acetylase RimI-like enzyme	COG0456	372.705	244.578	326.682	302.527	141.925	23.5033	18.8846	91.3635	31.592
Ga0214976_100204510	formate dehydrogenase major subunit	KO:K00123	113.173	77.1792	120.283	99.5713	35.878	5.59965	4.34551	28.3609	7.34614
Ga0214976_100204511	NADP-reducing hydrogenase subunit HndC	KO:K18331	102.955	63.2319	83.9329	77.2418	45.9578	5.45137	5.56637	23.0082	6.03062
Ga0214976_100204512	NADP-reducing hydrogenase subunit HndB	KO:K17992	92.5463	38.1683	40.1138	48.554	42.3064	2.50913	6.40515	25.9939	4.28607
Ga0214976_100204513	signal transduction histidine kinase	COG0642	200.18	98.7073	130.497	122.633	95.043	9.66318	19.7341	41.2482	13.7555
Ga0214976_100204514	NADH:ubiquinone oxidoreductase subunit E	COG1905	297.112	134.315	214.081	205.153	116.883	13.3691	10.112	58.136	21.6529
Ga0214976_100204515	hypothetical protein	KO:K07053	78.2983	44.6665	49.8721	45.0287	30.5184	1.77281	3.29129	21.5196	4.18456
Ga0214976_100204516	hypothetical protein	Hypo-rule applied	76.659	39.5429	58.9437	38.4873	27.0304	2.43142	0	14.3936	5.22133
Ga0214976_100204517	dissimilatory sulfite reductase (desulfoviridin) alpha/beta subunit/iron only hydrogenase large subunit-like protein/iron only hydrogenase large subunit-like protein/CO dehydrogenase/acetyl-CoA synthase gamma subunit (corrinoid Fe-S protein)	COG2221,COG4624,COG4624,COG1456	156.029	84.5544	130.519	117.193	50.4595	6.27783	8.30625	24.0198	9.66646
Ga0214976_100204518	anti-sigma regulatory factor (Ser/Thr protein kinase)	COG2172	65.1283	49.7836	59.0471	59.1317	34.7742	3.48546	2.19015	17.2827	5.12946
Ga0214976_100204519	hypothetical protein	Hypo-rule applied	113.915	49.6509	78.1197	70.0721	39.3704	5.05917	3.87442	19.6543	6.04942
Ga0214976_10020452	acyl-coenzyme A thioesterase PaaI-like protein	COG2050	12.6977	7.24712	10.1216	8.00787	7.25577	1.39857	0	1.93184	0
Ga0214976_100204520	starch phosphorylase	KO:K00688	57.0244	37.6331	53.0859	46.1625	31.899	2.57845	3.51046	8.98011	2.71045
Ga0214976_100204521	starch synthase	KO:K00703	144.351	80.5242	107.776	106.026	49.2737	3.34507	2.92769	20.6274	5.87729
Ga0214976_10020453	DNA-binding GntR family transcriptional regulator	COG1802	108.851	61.2618	85.6698	84.8128	45.0771	2.55551	2.08753	27.0627	4.65632
Ga0214976_10020454	uncharacterized SAM-binding protein YcdF (DUF218 family)	COG1434	44.4014	35.8354	40.0812	40.1421	22.5317	1.80277	0	10.5643	2.23962
Ga0214976_10020455	putative ATPase	KO:K07478	65.2365	49.6057	57.3408	53.5314	33.0449	3.16337	1.3968	11.2191	1.6357
Ga0214976_10020456	beta-phosphoglucomutase-like phosphatase (HAD superfamily)	COG0637	81.8896	45.0673	60.8581	57.243	38.546	3.11574	1.46837	12.4147	3.27525
Ga0214976_10020457	Ni,Fe-hydrogenase maturation factor	COG0680	357.667	229.398	367.608	287.707	118.082	21.482	10.4453	93.6113	29.3563
Ga0214976_10020458	NAD-reducing hydrogenase large subunit	KO:K00436	218.752	145.455	216.313	172.923	62.6101	9.70353	6.661	57.4434	11.5889
Ga0214976_10020459	NAD-reducing hydrogenase small subunit	KO:K18007	104.569	63.3063	99.5334	84.2375	41.44	5.18119	0.881748	23.8559	7.96541
Ga0214976_10020931	STE24 endopeptidase	KO:K06013	27.2151	15.3628	26.5318	17.5665	6.09094	2.08719	0	8.40883	0.713064
Ga0214976_100209310	iron complex transport system ATP-binding protein	KO:K02013	42.2883	31.8824	26.3483	32.3326	12.6405	0.590664	0	9.51863	0.403587
Ga0214976_100209311	iron complex transport system permease protein	KO:K02015	30.9295	15.1495	12.5872	18.221	13.0838	1.64219	0	6.75104	1.28236
Ga0214976_100209312	LacI family transcriptional regulator	KO:K02529	20.3439	7.91838	10.7867	10.5484	9.25452	0.411654	0	4.10667	0.750063
Ga0214976_100209313	hypothetical protein	Hypo-rule applied	245.639	98.4693	190.402	127.075	95.7935	21.5999	5.69176	78.5999	22.8522
Ga0214976_100209314	lipoprotein-anchoring transpeptidase ErfK/SrfK	COG1376	25.0662	11.1201	15.0272	11.6006	17.16	0.508867	0.692802	4.29547	0
Ga0214976_100209315	uridine kinase	KO:K00876	18.9818	10.9896	16.5392	13.23	9.9024	1.48455	0.577475	3.74318	0.772847
Ga0214976_100209316	tungstate transport system ATP-binding protein	KO:K06857	21.9938	10.9951	17.6163	14.9095	12.9951	2.27712	0.465031	4.98018	2.33385
Ga0214976_100209317	tungstate transport system permease protein	KO:K05773	17.0676	10.7326	15.3929	16.9692	9.94601	1.50035	0.680891	2.68649	0.227813
Ga0214976_100209318	tungstate transport system substrate-binding protein	KO:K05772	2108.3	1304.16	1736.55	1669.96	629.038	118.262	84.8484	557.956	191.855
Ga0214976_100209319	aspartate/methionine/tyrosine aminotransferase	COG0436	33.1614	21.929	23.5277	23.6818	15.6936	1.51249	2.88287	8.35678	1.37793
Ga0214976_10020932	thiamine-phosphate pyrophosphorylase	KO:K00788	38.425	33.9475	39.386	38.9154	20.3488	3.92227	0	12.8996	6.89143
Ga0214976_100209320	CRISPR-associated exonuclease Cas4	KO:K07464	3.86658	1.25722	2.33107	7.92352	4.15376	1.06753	0	1.22881	2.91767
Ga0214976_10020933	hydroxyethylthiazole kinase	KO:K00878	138.383	94.8886	123.992	116.038	60.368	11.1364	4.08201	30.2394	12.8771
Ga0214976_10020934	hydroxymethylpyrimidine/phosphomethylpyrimidine kinase	KO:K00941	50.6985	36.5207	37.1855	37.708	24.3538	1.99151	3.48603	14.7367	4.08225
Ga0214976_10020935	hypothetical protein	KO:K06942	28.1999	16.9103	21.5001	21.3717	16.5543	0.850902	1.7377	7.34592	2.0349
Ga0214976_10020936	bis(5'-nucleosidyl)-tetraphosphatase	KO:K01518	19.2737	8.95264	12.773	9.06805	10.0837	0.259155	0	4.77294	1.4166
Ga0214976_10020937	uncharacterized protein DUF4139	pfam13598	20.9932	13.7737	19.8562	16.009	9.2626	1.24201	1.26821	5.53991	2.01551
Ga0214976_10020938	ferrous iron transport protein A	KO:K04758	227.607	185.18	126.651	199.939	79.2601	8.37128	15.3862	33.7261	23.4516
Ga0214976_10020939	ferrous iron transport protein B	KO:K04759	120.04	92.9416	64.6738	110.231	34.6323	3.67892	1.45414	13.9337	6.97355
Ga0214976_10021111	SEL1 protein	KO:K14026	144.138	132.925	116.88	136.027	79.9876	10.4725	7.12893	54.9157	15.1063
Ga0214976_100211110	ATP phosphoribosyltransferase regulatory subunit	KO:K02502	115.247	96.1224	72.158	123.434	58.5465	3.10964	4.5068	30.9449	8.08774
Ga0214976_100211111	DNA repair protein RadA/Sms	KO:K04485	41.5166	31.9411	29.9594	31.3515	18.0203	2.51826	1.41869	13.1942	3.08533
Ga0214976_100211112	membrane-bound serine protease (ClpP class)	KO:K07403	96.2724	70.6384	60.5424	79.2894	35.7652	4.0397	1.79344	24.6653	7.2006
Ga0214976_100211113	regulator of protease activity HflC (stomatin/prohibitin superfamily)	COG0330	20.0049	15.1886	12.9219	17.3099	7.83515	1.43833	2.34987	2.98014	1.769
Ga0214976_100211114	leucyl-tRNA synthetase	KO:K01869	89.4247	72.4694	83.5413	84.8553	42.2137	5.73808	2.88154	21.9806	5.01335
Ga0214976_100211115	DNA polymerase-3 subunit delta	KO:K02340	632.08	340.271	596.763	420.813	233.078	33.8504	23.3819	132.365	45.9183
Ga0214976_100211116	small subunit ribosomal protein S20	KO:K02968	744.667	626.344	498.077	623.439	557.704	51.245	44.064	201.355	33.1716
Ga0214976_100211117	uncharacterized membrane protein YheB (UPF0754 family)	COG4399	31.956	16.762	20.0963	20.5855	13.6022	0.624253	0	6.03595	1.53554
Ga0214976_100211118	ribonuclease P protein component	KO:K03536	343.703	211.886	256.243	203.089	181.552	18.1454	8.23474	111.396	25.5838
Ga0214976_100211119	YidC/Oxa1 family membrane protein insertase	KO:K03217	99.5381	62.1661	81.3902	63.8254	52.6074	3.73966	3.52481	30.1325	7.4691
Ga0214976_10021112	hypothetical protein	KO:K07024	148.971	76.3819	131.287	102.938	47.1736	7.38365	3.35085	25.8123	5.97935
Ga0214976_100211120	spoIIIJ-associated protein	KO:K06346	94.9674	48.4384	72.9424	57.4729	48.4671	5.91979	4.5335	25.5531	4.80326
Ga0214976_10021113	hypothetical protein	KO:K09129	140.316	103.306	84.7198	103.52	89.8839	10.0674	5.73757	40.9637	15.6774
Ga0214976_10021114	hypothetical protein	Hypo-rule applied	115.815	98.8381	100.547	100.166	59.1585	5.67614	3.31193	33.3685	11.7736
Ga0214976_10021115	phosphoribosyl-ATP pyrophosphohydrolase/phosphoribosyl-AMP cyclohydrolase	KO:K11755	42.1016	62.2177	22.1885	70.2959	14.1931	2.55337	0.744925	11.3367	5.23398
Ga0214976_10021116	cyclase	KO:K02500	29.3155	45.6788	12.4968	43.3696	13.089	1.52905	1.24905	14.0805	2.71639
Ga0214976_10021117	phosphoribosylformimino-5-aminoimidazole carboxamide ribotide isomerase	KO:K01814	14.6594	17.7462	6.41452	19.2079	9.73677	0	0	7.13849	1.56114
Ga0214976_10021118	imidazoleglycerol-phosphate dehydratase	KO:K01693	33.8555	38.0926	13.8523	39.1286	22.9313	1.43909	0	8.04591	0.842826
Ga0214976_10021119	ATP phosphoribosyltransferase	KO:K00765	49.8539	56.622	27.1534	56.16	26.1252	2.15816	0	10.3509	1.47462
Ga0214976_10021421	chemotaxis protein CheX	KO:K03409	44.3761	26.4655	29.0384	26.8384	24.2717	1.91935	0	9.94199	3.60649
Ga0214976_100214210	putative hydroxymethylpyrimidine transport system substrate-binding protein	KO:K15598	54.2523	37.3915	26.1848	49.2989	27.7067	4.02111	6.1589	3.76075	0
Ga0214976_100214211	predicted membrane protein	COG4732	42.6149	29.1662	22.6774	34.2993	20.7552	1.37164	0	2.63145	1.24961
Ga0214976_100214212	biopolymer transport protein ExbB	KO:K03561	116.484	66.5827	85.7618	92.4308	44.5086	7.69165	0.805529	14.9832	7.27688
Ga0214976_100214213	iron complex transport system substrate-binding protein	KO:K02016	57.0842	41.235	39.5829	43.5461	30.0474	3.29075	1.07525	6.3637	1.25915
Ga0214976_100214214	biopolymer transport protein ExbD	KO:K03559	36.2773	24.8632	25.3627	29.5176	19.8679	1.47292	0	5.42545	0.80513
Ga0214976_100214215	protein TonB	KO:K03832	39.6825	29.8266	27.6515	31.7776	25.9137	2.81405	4.59746	5.83055	0.384554
Ga0214976_100214216	Na+/H+-dicarboxylate symporter	COG1301	226.66	171.287	130.65	182.234	87.9876	9.5229	5.55645	45.0993	11.0305
Ga0214976_100214217	CDP-diacylglycerol--serine O-phosphatidyltransferase	KO:K17103	18.0512	8.10225	13.7892	8.78827	13.0685	0.65006	1.32755	3.36722	0.444171
Ga0214976_100214218	phosphatidylserine decarboxylase	KO:K01613	18.2178	12.8195	21.8959	12.537	13.6315	0	0	3.8886	1.53884
Ga0214976_100214219	DNA gyrase subunit A	KO:K02469	26.6778	16.4519	20.6012	22.0919	18.098	1.57696	0.780718	7.37086	0.914245
Ga0214976_10021422	RNase H-fold protein (predicted Holliday junction resolvase)	COG0816	36.4728	19.4111	25.1707	17.6072	24.8874	1.96805	2.00956	11.8933	2.68944
Ga0214976_100214220	nitroreductase	COG0778	130.201	92.5642	104.1	114.418	44.4217	5.92782	2.69016	36.8969	7.80065
Ga0214976_100214221	CO dehydrogenase maturation factor	KO:K07321	14.2294	15.0956	6.543	11.6497	9.06815	0	0	1.14971	1.36492
Ga0214976_10021423	KDO2-lipid IV(A) lauroyltransferase	KO:K02517	80.3232	32.9845	41.6725	42.2979	18.2204	2.65059	4.33041	21.9675	5.25215
Ga0214976_10021424	F420-0:gamma-glutamyl ligase	COG1478	29.986	26.2557	30.7466	25.6611	19.2772	2.15121	1.59752	7.65375	2.67249
Ga0214976_10021425	molybdate transport system substrate-binding protein	KO:K02020	59.1953	143.318	33.4388	190.836	18.5376	1.55355	1.90359	11.4449	11.6765
Ga0214976_10021426	molybdate transport system permease protein	KO:K02018	35.0666	74.7536	19.7063	86.9053	9.41778	1.8153	1.48288	5.85076	4.2172
Ga0214976_10021427	molybdate transport system ATP-binding protein	KO:K02017	26.3201	59.5374	20.0288	66.7227	9.68322	0.959897	0.435621	3.9286	4.9555
Ga0214976_10021428	NitT/TauT family transport system ATP-binding protein	KO:K02049	24.1265	20.5954	14.2652	24.4104	11.3749	1.7227	1.91896	2.16324	0.214015
Ga0214976_10021429	putative hydroxymethylpyrimidine transport system permease protein	KO:K15599	23.5775	20.3901	16.446	19.3506	11.3291	0.935878	0	2.15454	0.852618
Ga0214976_10022521	tRNA-2-methylthio-N6-dimethylallyladenosine synthase	KO:K06168	56.8008	39.6272	51.0809	51.5195	20.7348	3.8825	0.932801	13.6701	3.74516
Ga0214976_100225210	aspartyl-tRNA(Asn)/glutamyl-tRNA(Gln) amidotransferase subunit B	KO:K02434	64.3924	46.4923	51.2648	57.2959	28.7368	2.15188	0.651044	14.3115	2.28718
Ga0214976_100225211	elongation factor G	KO:K02355	113.379	78.2133	94.6274	86.7602	45.5852	6.15343	4.07562	27.5666	6.2878
Ga0214976_100225212	formate dehydrogenase major subunit	KO:K00123	15.8465	10.4041	13.7678	12.6936	10.0083	1.11781	0.147277	3.23749	0.83769
Ga0214976_100225213	NADH:ubiquinone oxidoreductase subunit E	COG1905	7.72135	5.92779	8.8667	4.23826	2.30412	0	0	4.08979	0
Ga0214976_10022522	competence protein ComEA	KO:K02237	157.035	114.197	149.278	134.604	68.3486	10.509	7.46485	43.4781	9.36596
Ga0214976_10022523	competence protein ComEC	KO:K02238	58.5074	30.1175	46.68	36.5588	20.9938	2.14718	1.34922	11.5974	2.48282
Ga0214976_10022524	type III pantothenate kinase	KO:K03525	61.4165	27.3834	48.9359	37.9508	22.5195	3.65531	0	11.2202	4.78705
Ga0214976_10022525	tRNA-dihydrouridine synthase	COG0042	29.2001	15.7611	21.1489	23.1338	12.4727	1.44249	1.47292	4.98127	0.32854
Ga0214976_10022526	lysyl-tRNA synthetase class 2	KO:K04567	61.0194	30.8951	46.895	46.777	24.522	1.84456	1.25565	9.37762	3.676
Ga0214976_10022527	DNA ligase (NAD+)	KO:K01972	185.708	104.803	163.899	128.669	63.4193	8.01494	8.00739	33.5847	13.8684
Ga0214976_10022528	aspartyl-tRNA(Asn)/glutamyl-tRNA(Gln) amidotransferase subunit C	KO:K02435	45.3808	22.7674	38.7027	28.0233	16.187	1.46828	0	8.45052	0
Ga0214976_10022529	aspartyl-tRNA(Asn)/glutamyl-tRNA(Gln) amidotransferase subunit A	KO:K02433	144.792	73.5611	126.369	95.472	53.3977	10.6854	4.81359	32.9199	15.5685
Ga0214976_10026671	large subunit ribosomal protein L23	KO:K02892	69.0556	43.7487	57.5145	57.7803	29.7589	2.86805	1.67346	22.6379	1.11981
Ga0214976_100266710	large subunit ribosomal protein L24	KO:K02895	122.731	82.9505	121.142	97.2662	32.4061	4.28322	0	41.0861	7.31656
Ga0214976_100266711	large subunit ribosomal protein L5	KO:K02931	143.181	114.787	180.553	134.876	40.0968	5.3672	14.0299	39.5397	8.80147
Ga0214976_100266712	small subunit ribosomal protein S14	KO:K02954	81.7095	52.3455	94.5711	78.6967	17.9472	1.25795	5.13797	18.8241	5.15719
Ga0214976_100266713	small subunit ribosomal protein S8	KO:K02994	83.4568	70.3273	81.7605	78.029	27.6437	5.18439	3.52917	29.1752	2.36158
Ga0214976_100266714	large subunit ribosomal protein L6	KO:K02933	88.0936	75.7835	87.2684	75.7847	28.6456	3.88551	4.17629	26.3644	4.75084
Ga0214976_100266715	large subunit ribosomal protein L18	KO:K02881	99.8669	83.91	120.139	91.3619	29.5278	7.90495	0	29.8455	10.8025
Ga0214976_100266716	small subunit ribosomal protein S5	KO:K02988	85.5916	70.8619	97.5738	85.0258	25.5076	3.98015	4.78131	23.7159	8.95849
Ga0214976_100266717	large subunit ribosomal protein L30	KO:K02907	56.503	45.1769	61.4275	59.3175	14.9261	2.55738	5.22266	14.7188	1.7474
Ga0214976_100266718	large subunit ribosomal protein L15	KO:K02876	55.9422	53.1554	65.2714	70.9576	14.889	3.91348	0	21.6227	3.20879
Ga0214976_100266719	preprotein translocase subunit SecY	KO:K03076	66.1544	52.7852	68.4381	62.7407	15.8863	2.882	1.83925	12.4403	1.59998
Ga0214976_10026672	large subunit ribosomal protein L2	KO:K02886	164.4	103.147	154.692	121.159	69.2094	6.70507	2.28217	38.5904	3.81785
Ga0214976_100266720	adenylate kinase	KO:K00939	42.8918	39.5098	53.6484	43.5295	9.16054	1.76572	0	10.1624	0.48259
Ga0214976_100266721	methionyl aminopeptidase	KO:K01265	72.8417	59.3293	84.0537	71.1074	19.5239	3.76329	4.91862	13.8619	4.93702
Ga0214976_100266722	ribosomal protein L14E/L6E/L27E	COG2163	106.769	68.0457	96.3776	72.3265	36.4289	4.01244	9.83301	30.4831	8.77315
Ga0214976_100266723	translation initiation factor IF-1	KO:K02518	26.5505	13.8294	11.9883	22.6386	9.69211	0.533765	6.5403	13.5169	2.18826
Ga0214976_100266724	large subunit ribosomal protein L36	KO:K02919	53.0474	12.7901	19.1654	37.0141	16.903	1.86177	0	23.5736	0
Ga0214976_100266725	small subunit ribosomal protein S13	KO:K02952	49.2983	32.5596	38.0987	38.3349	26.7952	2.43051	1.24089	8.39315	2.90625
Ga0214976_100266726	small subunit ribosomal protein S11	KO:K02948	70.3862	52.3209	70.1886	54.4511	26.95	3.8589	9.69923	19.1344	5.67904
Ga0214976_100266727	small subunit ribosomal protein S4	KO:K02986	91.2932	63.7022	89.0636	78.049	52.5568	4.647	3.03682	13.6936	4.06424
Ga0214976_100266728	DNA-directed RNA polymerase subunit alpha	KO:K03040	79.4263	60.7866	84.2482	69.3115	52.2641	6.11234	4.62317	21.368	6.49665
Ga0214976_100266729	large subunit ribosomal protein L17	KO:K02879	92.6489	58.2308	89.4598	65.1854	49.5941	6.26305	2.6927	28.0782	8.10832
Ga0214976_10026673	small subunit ribosomal protein S19	KO:K02965	119.388	62.0972	103.34	90.6693	34.3732	2.89867	0	26.6928	1.13177
Ga0214976_100266730	energy-coupling factor transport system ATP-binding protein	KO:K16786	18.9805	17.1296	22.7828	20.7548	16.4567	2.47576	0	5.6996	1.90308
Ga0214976_100266731	energy-coupling factor transport system ATP-binding protein	KO:K16787	16.1548	10.3783	13.5767	16.2092	12.1296	0.53954	0	2.89825	0.98308
Ga0214976_10026674	large subunit ribosomal protein L22	KO:K02890	140.316	69.8941	129.448	97.5523	40.0029	2.80388	4.29454	20.9787	6.22642
Ga0214976_10026675	small subunit ribosomal protein S3	KO:K02982	92.1285	50.8295	60.2095	64.8022	36.2745	2.93492	5.64109	22.2572	2.35925
Ga0214976_10026676	large subunit ribosomal protein L16	KO:K02878	76.1511	48.2402	41.0473	57.9427	30.325	2.99058	0	29.4169	2.97221
Ga0214976_10026677	large subunit ribosomal protein L29	KO:K02904	69.0013	31.6565	27.0125	44.4744	21.0586	1.08243	0	26.1652	0.739597
Ga0214976_10026678	small subunit ribosomal protein S17	KO:K02961	68.8523	36.6366	27.75	45.4781	35.0258	1.98568	3.24411	31.9995	3.25624
Ga0214976_10026679	large subunit ribosomal protein L14	KO:K02874	84.7495	46.4236	65.8889	58.5051	21.3256	3.16198	5.16589	26.2058	1.7284
Ga0214976_100320310	hypothetical protein	Hypo-rule applied	37.758	18.6511	28.0816	25.4539	10.3784	1.66706	1.36178	8.44325	2.96156
Ga0214976_100320311	hypothetical protein	KO:K06973	303.772	114.493	225.518	146.814	89.0319	14.3986	6.15447	44.3257	18.3037
Ga0214976_100320312	dTDP-4-amino-4,6-dideoxygalactose transaminase	COG0399	161.272	74.5818	115.511	106.02	47.0122	7.31117	10.5146	41.249	10.4133
Ga0214976_100320313	DNA-binding GntR family transcriptional regulator	COG1802	74.0243	36.4057	48.1427	43.7862	23.6025	4.8994	1.42936	18.1273	5.73882
Ga0214976_100320314	hypothetical protein	Hypo-rule applied	60.4962	34.0952	36.4717	28.9265	31.7726	2.227	0	12.8173	2.28249
Ga0214976_100320315	GntR family transcriptional regulator/MocR family aminotransferase	KO:K00375	20.2088	13.816	19.1734	17.9446	12.2308	0.757777	0.343894	6.78426	0.575301
Ga0214976_10032032	2'-5' RNA ligase	KO:K01975	61.8883	33.2348	48.2366	31.46	21.56	1.9329	0	6.2298	1.32071
Ga0214976_10032033	nicotinamide-nucleotide amidase	KO:K03742	62.1118	37.7842	52.2879	51.8218	26.9327	2.9932	1.52817	15.5044	2.17301
Ga0214976_10032034	phosphatidylglycerophosphatase A	KO:K01095	21.6976	11.494	13.7004	12.3113	15.714	0.757229	0	4.6487	1.03479
Ga0214976_10032035	ribosomal protein S12 methylthiotransferase	KO:K14441	47.6309	26.5277	36.6558	29.2315	21.9686	2.91123	0	9.54543	1.32612
Ga0214976_10032036	cytoskeleton protein RodZ	KO:K15539	21.2233	11.3296	17.924	19.752	9.18791	0.787108	0	4.83213	0.896354
Ga0214976_10032037	ribulose-phosphate 3-epimerase	KO:K01783	28.9904	15.0502	20.2472	21.3955	11.3408	0.168151	0	6.5809	0.459576
Ga0214976_10032038	serine/threonine-protein kinase	KO:K08884	32.5597	19.455	20.3553	18.6658	19.0156	2.37471	4.21705	8.3193	1.97532
Ga0214976_10032039	16S rRNA (cytosine967-C5)-methyltransferase	KO:K03500	32.4526	20.9303	25.541	27.6575	16.0553	1.67998	1.44457	8.34585	0.845815
Ga0214976_10033531	3-phosphoshikimate 1-carboxyvinyltransferase	KO:K00800	50.0964	53.8385	39.5097	54.687	24.6914	3.10814	1.58685	9.83871	7.16754
Ga0214976_100335310	hypothetical protein	Hypo-rule applied	21.7971	17.3445	17.2282	17.6691	17.7843	0.57133	0.777843	11.3992	1.041
Ga0214976_100335311	hypothetical protein	Hypo-rule applied	29.4298	16.7008	26.2551	16.5808	10.1409	0.689886	0	10.5882	1.25702
Ga0214976_100335312	fimbrial assembly protein PilN	pfam05137	30.2936	22.1698	29.0857	21.5012	11.7983	2.08464	0	8.28949	2.07183
Ga0214976_10033532	chorismate synthase	KO:K01736	90.228	125.314	70.05	107.443	41.5708	8.26172	6.09832	27.0402	7.48138
Ga0214976_10033533	shikimate kinase/3-dehydroquinate synthase	KO:K13829	85.2672	116.495	72.0745	115.069	32.8951	5.50449	4.55341	22.1363	8.09349
Ga0214976_10033534	chorismate mutase/prephenate dehydratase	KO:K14170	132.497	132.12	137.835	140.421	63.0751	10.1229	8.09864	35.3171	10.4107
Ga0214976_10033535	hypothetical protein	Hypo-rule applied	18.3307	15.267	18.052	11.7112	6.45647	0.933376	0	3.5813	1.27551
Ga0214976_10033536	ATP-binding protein involved in chromosome partitioning	KO:K03593	71.2723	50.2107	66.6215	54.3876	43.5575	5.77213	2.14323	14.7984	6.27448
Ga0214976_10033537	hypothetical protein	KO:K07138	305.243	214.513	283.577	241.476	118.395	17.7322	12.8565	75.3643	45.3095
Ga0214976_10033538	hypothetical protein	KO:K07138	223.63	191.587	180.29	189.412	76.4689	12.2011	8.3614	47.5061	21.2614
Ga0214976_10033539	type IV pilus assembly protein PilQ	KO:K02666	52.2974	44.1956	50.6215	42.0662	34.0546	3.58624	2.35408	23.4415	4.81328
Ga0214976_10037521	osmoprotectant transport system ATP-binding protein	KO:K05847	23.3	7.4805	5.31191	11.6072	10.5171	0	0	3.73354	1.66216
Ga0214976_100375210	Mrp family chromosome partitioning ATPase	COG0489	22.7905	13.3495	15.2986	15.4532	12.0016	0	0	4.26054	0.632259
Ga0214976_100375211	hypothetical protein	Hypo-rule applied	108.322	103.078	99.8197	92.5354	49.6447	2.2966	9.38017	29.9604	6.27684
Ga0214976_100375212	hypothetical protein	Hypo-rule applied	90.0435	66.54	59.163	70.4337	17.8252	6.8717	1.87111	15.8198	6.26036
Ga0214976_100375213	wyosine [tRNA(Phe)-imidazoG37] synthetase (radical SAM superfamily)	COG0731	129.128	111.697	101.635	124.225	53.6957	7.10413	4.50248	24.2503	9.87556
Ga0214976_100375214	glycine cleavage system protein P-like pyridoxal-binding family	COG1003	61.7091	47.3782	59.8371	49.5026	24.9758	3.35872	1.52425	14.7773	6.6298
Ga0214976_100375215	glycine cleavage system pyridoxal-binding protein P	COG0403	27.5414	14.3562	15.1574	11.7957	11.9409	1.02295	0	2.94375	2.09688
Ga0214976_10037522	nucleotide-binding universal stress UspA family protein	COG0589	249.4	140.703	204.718	166.604	60.8918	7.57229	5.15469	38.3518	12.7625
Ga0214976_10037523	hypothetical protein	Hypo-rule applied	200.67	110.278	154.428	95.4556	64.2972	9.63936	0	34.8721	4.23408
Ga0214976_10037524	UDP-glucose 4-epimerase	KO:K01784	278.073	125.641	214.732	162.473	65.4516	11.2686	2.50138	50.4745	15.5666
Ga0214976_10037526	aspartate aminotransferase-like enzyme	COG0075	147.081	84.3664	136.016	116.697	59.9527	8.8046	10.2163	35.9325	16.8174
Ga0214976_10037527	DNA-binding transcriptional ArsR family regulator	COG0640	5.18218	1.71131	2.92895	3.37785	10.4383	0.335334	0	0	0
Ga0214976_10037528	hypothetical protein	KO:K07089	7.21805	4.25286	5.94537	5.31812	2.86227	0.401244	0.409709	1.61653	0.548322
Ga0214976_10037529	thioredoxin-like protein	pfam13192	25.8012	12.4417	20.0557	18.9631	10.5703	0.905532	0	2.08468	1.23746
Ga0214976_100395310	hypothetical protein	COG4729	77.9353	40.3673	61.3921	48.5175	40.2028	6.15015	2.00956	13.0259	4.37034
Ga0214976_100395311	protein-L-isoaspartate(D-aspartate) O-methyltransferase	KO:K00573	68.9892	40.8298	67.2352	54.2874	31.5771	4.83345	2.92469	11.1274	2.93563
Ga0214976_10039533	sulfur carrier protein	KO:K03154	18.831	7.0462	13.1291	7.54721	12.8442	0.618941	0	4.2747	3.38326
Ga0214976_10039534	tRNA(Ile)-lysidine synthase TilS/MesJ	COG0037	15.2767	9.59353	12.0736	11.4436	9.01014	1.36457	0.506676	3.14147	1.52571
Ga0214976_10039535	predicted ribosome quality control (RQC) complex YloA/Tae2 family protein	COG1293	15.5962	9.86974	12.7253	12.691	12.8599	1.13315	0.867794	3.42392	0.387129
Ga0214976_10039536	23S rRNA-/tRNA-specific pseudouridylate synthase	COG0564	108.785	88.2793	119.941	98.7044	48.8849	7.84171	3.61612	27.9528	8.1235
Ga0214976_10039537	RNA polymerase-binding transcription factor DksA	COG1734	334.569	176.757	327.274	196.638	129.594	22.7662	11.6233	116.47	18.1483
Ga0214976_10039538	isoleucyl-tRNA synthetase	KO:K01870	94.5388	72.4821	91.6125	80.3547	50.9755	6.22988	4.26933	22.6202	6.45652
Ga0214976_10039539	TRAP-type uncharacterized transport system fused permease subunit	COG4666	93.4142	60.4865	94.9247	72.7932	45.5578	5.61284	4.6836	12.6438	4.86607
Ga0214976_10040711	iron(III) transport system ATP-binding protein	KO:K02010	12.1544	11.1631	10.6039	16.289	6.78292	0.980569	1.33501	3.0099	0.446666
Ga0214976_100407110	hypothetical protein	Hypo-rule applied	289.057	102.695	93.7482	121.383	73.8313	4.6042	8.54788	59.7433	13.1558
Ga0214976_100407111	nitrogen regulatory protein PII	COG0347	27.6622	17.1119	18.43	17.9532	11.2139	0.7205	0	3.31742	1.4769
Ga0214976_100407112	uncharacterized protein DUF1538	pfam07556	19.9606	9.90468	18.0196	16.1926	6.88935	0.995956	0	3.05713	0.680513
Ga0214976_100407113	stage V sporulation protein S	KO:K06416	4403.9	2169.39	3297.82	2514.35	1752.99	282.399	217.524	821.159	333.928
Ga0214976_10040712	iron(III) transport system permease protein	KO:K02011	26.9612	17.2721	18.6885	22.0427	12.5617	1.31442	1.41279	4.77791	1.229
Ga0214976_10040713	iron(III) transport system substrate-binding protein	KO:K02012	53.0323	45.6788	42.712	46.4656	34.2661	4.9393	1.40749	13.4866	5.49404
Ga0214976_10040714	metal-dependent amidase/aminoacylase/carboxypeptidase family protein	COG1473	130.803	80.1023	121.342	105.307	59.8057	9.26157	4.82908	34.0239	8.4825
Ga0214976_10040715	hypothetical protein	Hypo-rule applied	22.6734	13.4583	18.4388	18.8025	17.0853	1.51995	0.689785	2.33278	2.30788
Ga0214976_10040716	histidinol dehydrogenase/sulfopropanediol 3-dehydrogenase	KO:K00013,KO:K15509	31.6625	26.4667	33.546	34.9069	16.6217	1.67158	4.55159	9.40685	2.53812
Ga0214976_10040717	hypothetical protein	Hypo-rule applied	11.2968	11.302	10.1036	8.90375	4.66763	0	0	1.38083	0.819656
Ga0214976_10040718	tRNA-binding protein	KO:K06878	10.6403	4.32462	4.29563	5.47547	8.03716	0.344263	0	1.5851	0
Ga0214976_10040719	CspA family cold shock protein	KO:K03704	4235.61	1043.19	2279.09	1520.38	1891.33	300.36	330.108	881.501	202.879
Ga0214976_10040761	threonine dehydratase	KO:K01754	77.1535	56.5447	76.5361	69.8111	30.3234	3.35915	1.6464	14.8479	3.30513
Ga0214976_100407610	uroporphyrinogen decarboxylase	KO:K01599	47.8984	33.2356	54.6066	37.9465	30.237	2.04501	1.67052	15.0654	0.838383
Ga0214976_10040762	uncharacterized protein YbbK (DUF523 family)	COG1683	22.5278	14.1411	24.0909	20.3344	8.73924	1.29578	2.11698	4.17632	2.47905
Ga0214976_10040763	hypothetical protein	Hypo-rule applied	18.0012	8.67123	11.8122	14.1156	7.67389	1.57777	0.805529	6.81054	1.34757
Ga0214976_10040764	TRAP-type C4-dicarboxylate transport system permease large subunit	COG1593	5.75483	2.54536	3.8266	3.57692	3.18205	0.262863	0.357878	1.41203	0.359217
Ga0214976_10040766	predicted deacylase	COG3608	6.82599	3.94659	4.28497	5.11887	4.38946	0.0995388	0	1.60408	1.36025
Ga0214976_10040767	dipeptidase	COG4690	12.689	6.6725	6.89287	7.28418	6.61365	0.708222	0.289265	5.38045	0.677476
Ga0214976_10040768	hypothetical protein	Hypo-rule applied	29.4316	18.295	28.1438	20.669	8.91183	1.64309	0	3.78266	2.04125
Ga0214976_10040769	uncharacterized 2Fe-2S/4Fe-4S cluster protein (DUF4445 family)	COG3894	71.2797	55.394	73.3899	64.6247	33.3361	4.19891	2.33863	14.0605	5.12946
Ga0214976_10042071	transcriptional pleiotropic repressor	KO:K03706	43.08	27.341	40.4677	34.0154	18.979	0.844214	0.574682	6.47839	1.53822
Ga0214976_10042072	ATP-dependent HslUV protease ATP-binding subunit HslU	KO:K03667	26.9381	16.7965	22.4088	22.377	10.5193	1.32416	1.01407	6.85898	1.24406
Ga0214976_10042073	ATP-dependent HslUV protease subunit HslV	KO:K01419	17.5083	9.11872	12.7314	13.3509	14.6415	0.868364	1.77337	5.49757	2.07667
Ga0214976_10042074	integrase/recombinase XerC	KO:K03733	43.4829	27.929	31.2984	32.883	24.6745	2.34546	2.12883	9.29935	0.534199
Ga0214976_10042075	methylenetetrahydrofolate--tRNA-(uracil-5-)-methyltransferase	KO:K04094	58.3556	34.901	66.9044	54.6178	29.0231	2.06558	1.05458	7.92548	3.05795
Ga0214976_10042076	DNA topoisomerase-1	KO:K03168	54.2714	36.2349	54.2284	46.4684	34.3297	3.86935	5.26797	10.1989	2.22235
Ga0214976_10042077	DNA processing protein	KO:K04096	15.4098	9.64516	10.6173	10.1501	10.4844	0.425451	0	0.979457	0
Ga0214976_10042078	magnesium chelatase family protein	KO:K07391	65.0985	40.2655	73.8528	46.4936	28.1342	4.10594	0.949258	10.701	3.9171
Ga0214976_10042079	putative endonuclease	KO:K07460	13.2222	8.62665	8.31596	8.59462	18.6898	1.441	1.4714	5.80548	0.492301
Ga0214976_10045892	VIT1/CCC1 family predicted Fe2+/Mn2+ transporter	COG1814	15.1928	9.45614	14.0429	10.3282	6.82896	1.71119	1.07525	3.33337	1.43903
Ga0214976_10045893	2-keto-4-pentenoate hydratase/2-oxohepta-3-ene-1,7-dioic acid hydratase in catechol pathway	COG0179	9.15649	4.92203	6.00993	8.43073	3.96636	0.458715	1.24905	1.40805	0.417906
Ga0214976_10045894	Na+/H+-dicarboxylate symporter	COG1301	29.0909	15.7893	27.6029	19.2906	11.4039	1.02891	2.29226	8.18287	1.53389
Ga0214976_10045895	diaminopimelate epimerase	KO:K01778	49.4223	26.6239	45.1728	31.2383	22.0347	2.02249	1.10142	16.1412	3.31661
Ga0214976_10045896	methyl-accepting chemotaxis protein	KO:K03406	28.9447	19.0626	26.6456	21.6433	12.6469	1.75516	0.531019	9.42823	1.77668
Ga0214976_10045897	HD-GYP domain-containing protein (c-di-GMP phosphodiesterase class II)	COG2206	54.2276	35.8832	50.0551	46.3021	21.1265	2.68592	1.41552	11.17	3.19684
Ga0214976_10045898	PD-(D/E)XK nuclease superfamily protein	pfam12705	10.5467	7.63546	13.838	9.95004	1.77032	0.682468	0	2.35673	0.932629
Ga0214976_10048841	flagellar hook-associated protein 2	KO:K02407	6.85296	1.67118	8.41052	6.39472	3.68097	0	0	0	0.969593
Ga0214976_100488410	methylated-DNA-[protein]-cysteine S-methyltransferase	KO:K00567	49.9751	26.3601	37.5893	35.2341	17.8956	2.75955	0	6.35292	4.08532
Ga0214976_100488411	malate dehydrogenase (oxaloacetate-decarboxylating)	KO:K00027	26.9226	19.7183	29.7037	24.3984	10.4334	1.02891	0	4.95279	3.45125
Ga0214976_100488412	phosphoribosyl 1,2-cyclic phosphodiesterase	COG1235	17.4864	16.8363	19.5198	18.0784	10.4869	0.878858	0.717919	7.68844	0.480403
Ga0214976_10048842	heptosyltransferase-2	KO:K02843	82.0821	48.4877	71.8643	66.6031	38.3385	4.45737	0	16.4725	7.3736
Ga0214976_10048843	D-sedoheptulose 7-phosphate isomerase	KO:K03271	56.3887	35.8002	35.7957	40.3441	21.4108	1.81185	3.28901	12.05	5.50219
Ga0214976_10048844	D-glycero-alpha-D-manno-heptose 1-phosphate guanylyltransferase	KO:K15669	31.1075	17.0041	16.1546	18.9816	12.0238	1.7582	1.9585	4.7836	0.655274
Ga0214976_10048845	GDPmannose 4,6-dehydratase/GDP-4-dehydro-6-deoxy-D-mannose reductase	KO:K01711,KO:K15856	42.6459	20.5857	27.3989	25.3539	12.2824	1.3021	0	7.08537	1.13234
Ga0214976_10048846	hypothetical protein	Hypo-rule applied	21.4011	7.25738	13.2301	13.9812	11.989	0.543742	1.11043	3.75535	0.743053
Ga0214976_10048847	D-glycero-D-manno-heptose 1,7-bisphosphate phosphatase	KO:K03273	35.5734	16.921	22.4732	27.8947	26.2469	2.02367	0	5.59057	0.829634
Ga0214976_10048848	hypothetical protein	KO:K07027	176.05	61.4958	123.012	99.4463	47.4278	7.11031	3.68778	21.5656	9.25392
Ga0214976_10048849	protein-S-isoprenylcysteine O-methyltransferase Ste14	COG2020	25.2179	14.9304	13.5957	16.022	13.8654	1.85026	0	5.67946	2.52848
Ga0214976_10054971	SSS family solute:Na+ symporter	KO:K03307	40.655	25.6301	19.5496	31.9857	18.1977	0.935376	1.52817	13.7817	1.53389
Ga0214976_10054972	hypothetical protein	KO:K07502	3.80812	2.85741	3.27975	2.09029	3.40914	0.101095	0	1.62917	0
Ga0214976_10054973	DEAD/DEAH box helicase domain-containing protein	KO:K06877	36.614	19.1517	33.727	24.2907	13.8105	1.33101	0.41818	6.71766	2.09872
Ga0214976_10054974	hypothetical protein	KO:K07088	18.4454	6.07723	7.83753	7.66923	10.5331	0.380679	1.55484	2.0449	1.38725
Ga0214976_10054975	glutaredoxin	COG0695	33.5353	17.8663	23.7108	14.4276	12.171	1.40759	0	7.56117	0.641182
Ga0214976_10054976	prolyl-tRNA synthetase	KO:K01881	42.7217	29.2357	39.0475	32.1527	23.9123	2.42587	1.98163	9.3079	1.98905
Ga0214976_10054977	O-acetyl-ADP-ribose deacetylase (regulator of RNase III)	COG2110	11.8304	4.8083	11.4625	10.3899	0	0	0	2.8198	0
Ga0214976_10055001	elongation factor Tu	KO:K02358	759.697	778.212	766.245	712.825	485.405	67.1834	42.7024	218.851	61.6474
Ga0214976_10055004	NTE family protein	KO:K07001	9.28898	3.98451	5.49281	5.61901	7.41871	0.504698	0.229042	1.93649	0.383164
Ga0214976_10055005	3-oxoacyl-[acyl-carrier protein] reductase	KO:K00059	159.932	95.465	128.28	114.303	65.7962	6.49972	9.06494	33.9414	11.4819
Ga0214976_10055006	aspartate racemase	KO:K01779	132.269	92.726	120.752	100.5	49.9478	6.14173	4.74584	28.6606	6.35146
Ga0214976_10055007	hypothetical protein	Hypo-rule applied	83.5056	48.4099	67.9057	56.5147	27.9427	3.7029	1.37491	14.4661	3.98683
Ga0214976_10055008	chromate transporter	KO:K07240	37.6366	18.7292	31.5167	23.9207	20.16	1.72706	0.881748	16.4009	3.8352
Ga0214976_10055009	chromate transporter	KO:K07240	45.9494	28.3637	37.2153	38.1945	18.5245	2.31041	0.857874	8.22019	1.72217
Ga0214976_10055811	rubredoxin	COG1773	797.745	297.491	380.9	558.336	341.958	30.1949	21.0559	139.027	99.6349
Ga0214976_10055812	hydrogenase maturation factor	COG0309	17.4852	10.9405	15.827	13.3231	9.26837	0.595501	0.48645	2.74188	0.97654
Ga0214976_10055813	hypothetical protein	KO:K09765	12.019	7.19891	13.2117	8.33339	6.22934	0.873252	0	2.01037	1.19335
Ga0214976_10055814	tRNA (adenine57-N1/adenine58-N1)-methyltransferase	KO:K07442	62.9232	27.2327	53.6379	44.8728	19.61	3.55753	3.02715	23.8875	6.07694
Ga0214976_10055815	transketolase	KO:K00615	22.093	13.552	19.4669	15.8385	12.8376	1.87095	0.986021	6.11348	1.23714
Ga0214976_10055816	alanine dehydrogenase	COG0686	533.745	374.174	528.367	433.984	208.966	33.6177	16.1538	118.366	38.5444
Ga0214976_10055817	alanine racemase	KO:K01775	90.2636	61.5333	71.0986	77.6246	30.0486	3.65258	3.40995	24.0252	5.41929
Ga0214976_10055818	AGCS family alanine or glycine:cation symporter	KO:K03310	43.6245	24.0415	31.0444	28.0041	21.8437	3.06213	0	15.8614	5.2307
Ga0214976_10062881	peptide/nickel transport system substrate-binding protein	KO:K02035	60.2235	48.4277	43.316	54.1468	21.0631	1.19192	0	15.2634	3.97024
Ga0214976_10062882	beta-aspartyl-dipeptidase (metallo-type)	KO:K01305	5.89379	4.4192	3.34756	3.45822	2.4562	0.736461	0.859425	0.726622	0.575093
Ga0214976_10062883	oligopeptide transport system ATP-binding protein	KO:K10823	41.7261	40.0807	39.1017	36.2772	20.5164	2.51656	0.978913	11.0353	7.36931
Ga0214976_10062884	peptide/nickel transport system ATP-binding protein/oligopeptide transport system ATP-binding protein	KO:K02031,KO:K15583	48.7055	49.0292	45.3726	47.3511	19.9564	3.60622	2.45487	13.0066	5.58518
Ga0214976_10062885	peptide/nickel transport system permease protein	KO:K02034	51.5387	43.8133	37.3569	48.5172	17.9625	3.12287	0	12.8158	2.96874
Ga0214976_10062886	peptide/nickel transport system permease protein/oligopeptide transport system permease protein	KO:K02033,KO:K15581	56.8664	39.286	40.3794	54.0896	21.6631	1.25269	0.568495	12.8173	3.04332
Ga0214976_10064431	transaldolase	KO:K00616	20.7216	14.2746	18.3759	12.1453	5.6595	1.45451	0	5.8599	1.98767
Ga0214976_10064432	transcription termination factor Rho	KO:K03628	60.0437	36.7675	45.8388	45.016	16.4068	2.16606	0.353881	12.7658	4.73606
Ga0214976_10064433	murein DD-endopeptidase MepM/ murein hydrolase activator NlpD	COG0739	175.388	108.73	139.331	124.997	84.4382	9.55939	6.73176	47.2397	14.4148
Ga0214976_10064434	phosphomannomutase	COG1109	208.716	113.04	159.06	143.869	88.2368	11.1983	9.28515	59.8953	10.3554
Ga0214976_10064435	CTP synthase	KO:K01937	111.65	51.3386	69.0072	61.9219	39.8549	5.75251	9.81455	38.5561	9.55274
Ga0214976_10064436	hypothetical protein	Hypo-rule applied	60.4353	31.2426	43.8316	38.1199	15.6615	2.19549	0	8.84514	0
Ga0214976_10069501	dTDP-4-amino-4,6-dideoxygalactose transaminase	COG0399	21.9624	17.6532	22.0324	16.0287	6.59039	1.77844	1.03769	5.84894	1.73595
Ga0214976_10069502	UDP-N-acetylglucosamine 4,6-dehydratase	KO:K15894	16.3433	13.4671	18.3659	15.2382	6.91466	1.62256	0	5.06947	1.42542
Ga0214976_10069503	glycosyltransferase involved in cell wall biosynthesis	COG0438	4.80964	1.3564	2.02889	2.26287	3.16339	0.101625	0	0.233958	0
Ga0214976_10069504	FlaA1/EpsC-like NDP-sugar epimerase/precorrin-6B methylase 2	COG1086,COG2242	6.90742	2.36415	4.62951	3.4209	4.7424	0.322627	0	2.72338	0
Ga0214976_10069505	flagellar protein FlaG	KO:K06603	7.71579	4.61522	4.51375	6.55259	7.81969	0.301453	0	2.77597	0
Ga0214976_10069506	flagellin	KO:K02406	39.6018	36.8858	37.8376	34.5184	21.6655	3.03715	0.775305	13.984	2.85342
Ga0214976_10075431	aspartyl-tRNA synthetase	KO:K01876	42.785	22.155	31.7054	33.5839	15.7453	1.42061	2.37367	9.36544	2.11782
Ga0214976_10075432	hypothetical protein	Hypo-rule applied	63.1196	28.4688	31.1857	33.669	25.5076	2.04861	0	21.6946	2.23962
Ga0214976_10075433	ADP-heptose:LPS heptosyltransferase	COG0859	39.383	24.894	34.0199	27.8768	19.2597	0.730298	0.994272	10.648	3.32664
Ga0214976_10075434	L-ascorbate metabolism protein UlaG (beta-lactamase superfamily)	COG2220	397.144	238.159	373.716	279.277	135.673	16.0145	11.8294	82.7569	21.8847
Ga0214976_10075435	DNA-binding MurR/RpiR family transcriptional regulator	COG1737	371.427	185.3	356.358	229.949	97.244	12.8991	7.13442	80.7356	22.2178
Ga0214976_10075436	tryptophanase	KO:K01667	63.2185	45.1866	49.284	51.9847	24.0691	4.26322	7.1699	12.7013	5.48322
Ga0214976_10085291	dihydrolipoamide dehydrogenase	KO:K00382	77.2671	56.3629	77.2725	76.9709	30.0914	4.01552	3.28018	19.3105	5.73131
Ga0214976_10085292	hypothetical protein	Hypo-rule applied	427.338	256.014	404.175	375.306	138.987	11.9067	13.2631	76.0036	29.5839
Ga0214976_10085293	drug/metabolite transporter (DMT)-like permease	COG0697	54.5581	38.5175	51.3782	47.0449	22.9844	2.73637	2.12883	6.89952	3.73939
Ga0214976_10085294	exodeoxyribonuclease-3	KO:K01142	77.8129	55.2801	81.9365	66.5626	37.2974	4.15045	0.605429	11.2613	4.65899
Ga0214976_10085295	hypothetical protein	KO:K07098	9.07942	5.38571	6.40367	7.38128	5.0087	0.101625	0	1.87166	0.555505
Ga0214976_10086331	stage II sporulation protein D	KO:K06381	87.3289	51.6202	82.8356	60.544	46.3977	4.61905	3.61263	16.5163	4.83486
Ga0214976_10086332	S-adenosylmethionine:tRNA ribosyltransferase-isomerase	KO:K07568	50.9558	31.5494	44.4497	39.0138	24.6204	2.21874	2.51728	13.3373	4.71649
Ga0214976_10086333	aromatic ring-opening dioxygenase LigB subunit	COG3885	75.0927	37.9396	66.1226	56.7393	21.148	2.22346	3.63258	10.5788	3.4436
Ga0214976_10086334	hypothetical protein	KO:K09141	69.814	39.4462	72.4658	51.9438	21.6761	3.55141	0	15.39	4.28222
Ga0214976_10086335	pyruvate formate lyase activating enzyme	KO:K04069	39.3189	21.9388	30.3157	29.0674	15.565	1.76483	0.961096	5.68808	2.57251
Ga0214976_10088061	nickel-dependent lactate racemase	COG3875	17.6372	6.78398	12.0754	8.12357	6.57473	0.576044	0	2.65229	0.157439
Ga0214976_10088062	tripartite tricarboxylate transporter TctB family protein	pfam07331	9.19542	3.73736	3.62981	3.92574	4.116	0	0	2.43529	0
Ga0214976_10088063	putative tricarboxylic transport membrane protein	KO:K07793	16.5625	8.68499	10.8894	12.1351	6.95026	0.382766	1.25069	3.17228	0.52307
Ga0214976_10088064	tripartite-type tricarboxylate transporter receptor subunit TctC	COG3181	33.1207	13.4377	14.64	13.146	11.2955	0.604786	0.494035	8.35389	1.65294
Ga0214976_10088065	3-isopropylmalate/(R)-2-methylmalate dehydratase small subunit	KO:K01704	10.7893	4.56788	5.6625	6.78593	7.24416	0.465443	0	0.535763	0.318027
Ga0214976_10088711	GTP cyclohydrolase-4	KO:K17488	31.0232	20.1028	35.9322	24.7314	14.1963	0.912123	1.59663	7.1995	1.0684
Ga0214976_10088712	flavoprotein	COG1036	30.0925	17.1844	28.9827	22.971	9.8489	2.23341	0	6.68418	1.83125
Ga0214976_10088713	dihydropteroate synthase	COG0294	19.888	14.481	21.921	17.3736	14.5465	0.78859	0.357878	4.84123	0.478956
Ga0214976_10088714	hypothetical protein	KO:K09154	81.8947	29.1814	51.3838	39.634	22.46	1.05591	3.45018	7.77877	2.8859
Ga0214976_10088715	predicted sugar kinase	COG1907	29.7226	13.0713	7.64959	12.8734	9.35454	0.96166	0.981946	8.02537	2.46405
Ga0214976_10088716	formylmethanofuran--tetrahydromethanopterin N-formyltransferase	KO:K00672	13.539	7.10033	6.58255	8.15078	2.34591	0	0	1.38799	0
Ga0214976_10090401	ribonuclease BN (tRNA processing enzyme)	COG1234	111.553	76.5842	115.506	90.3567	43.7612	9.08393	1.76677	21.9085	9.45804
Ga0214976_10090402	nicotinamidase-related amidase	COG1335	80.609	48.8772	69.8591	46.9599	28.1789	4.38703	0.853253	12.0234	4.56771
Ga0214976_10090403	hypothetical protein	Hypo-rule applied	256.724	153.725	199.039	184.294	129.292	17.7748	11.9751	47.2484	20.0332
Ga0214976_10090404	sulfur carrier protein	KO:K03154	88.998	39.882	80.7033	31.3148	45.9655	2.36266	4.825	12.2382	0.807174
Ga0214976_10090405	aldehyde:ferredoxin oxidoreductase	KO:K03738	89.9937	60.9753	68.1761	71.0519	36.8946	3.54235	2.41139	19.5227	4.54743
Ga0214976_10090406	Fe-S-cluster-containing hydrogenase component 2	COG1142	19.2205	5.84403	7.96093	8.53677	12.6095	0.303814	2.48179	9.79201	0
Ga0214976_10090961	peptide/nickel transport system substrate-binding protein	KO:K02035	18.9988	12.9726	19.1444	16.871	9.7514	0.524542	0.357071	4.42779	1.43363
Ga0214976_10090962	peptide/nickel transport system permease protein	KO:K02033	31.0268	21.1384	28.4761	28.4253	14.0879	0.808864	0.471958	8.2466	2.21071
Ga0214976_10090963	peptide/nickel transport system permease protein	KO:K02034	17.8908	10.0176	15.1216	15.2006	7.6674	0.492637	0	3.17556	2.15429
Ga0214976_10090964	peptide/nickel transport system ATP-binding protein/peptide/nickel transport system ATP-binding protein	KO:K02031,KO:K02032	46.7799	36.1871	48.2717	46.7884	17.248	2.87124	1.23445	9.74114	5.7823
Ga0214976_10090965	peptide/nickel transport system ATP-binding protein	KO:K02032	12.821	11.7523	17.6204	12.2782	2.93048	0	0	2.60079	2.31573
Ga0214976_10091751	betaine reductase	KO:K10672	68.1422	48.403	63.1216	52.9459	29.7405	2.81599	3.69694	19.2171	3.71077
Ga0214976_10091752	betaine reductase	KO:K10672	42.8889	23.2225	30.1625	24.7159	24.1472	2.17707	1.5331	15.0359	2.25696
Ga0214976_10091753	glycine reductase	KO:K10670	314.129	248.254	238.981	277.798	161.231	23.1276	35.4233	83.193	26.6668
Ga0214976_10091754	glycine reductase	KO:K10670	331.276	260.545	296.178	277.25	167.463	21.3701	11.4246	94.5312	25.8397
Ga0214976_10098272	O-acetyl-ADP-ribose deacetylase (regulator of RNase III)	COG2110	131.154	80.3547	89.023	101.316	58.3851	5.73311	10.4072	25.4194	4.64272
Ga0214976_10098273	Mn2+/Fe2+ NRAMP family transporter	COG1914	150.387	99.6866	129.403	116.974	57.2583	7.13578	3.49743	40.7407	10.0115
Ga0214976_10098274	allophanate hydrolase subunit 1	COG2049	26.184	18.6618	18.7063	20.3438	8.86579	0.932129	0	8.58365	1.91071
Ga0214976_10098275	allophanate hydrolase subunit 2	COG1984	27.9655	14.0847	21.9081	16.4777	9.61814	1.09054	0	6.52757	1.19223
Ga0214976_10098276	UPF0271 protein	KO:K07160	57.2719	32.9138	51.3145	54.9297	19.847	1.91278	1.30209	9.54098	5.22783
Ga0214976_10100331	hypothetical protein	Hypo-rule applied	91.1285	68.072	84.717	65.5253	48.7876	7.2338	0.84416	21.4115	5.08391
Ga0214976_10100332	6-phosphofructokinase 1	KO:K00850	270.638	209.613	289.11	210.435	159.651	24.8829	14.2382	62.2658	23.9834
Ga0214976_10100333	uncharacterized protein DUF4392	pfam14336	85.7667	60.4431	77.5093	74.9353	56.3528	3.66598	4.99108	18.4422	6.49412
Ga0214976_10100334	molybdopterin synthase sulfur carrier subunit	KO:K03636	94.2141	59.0938	81.2321	78.6608	29.1741	3.89311	8.83387	21.9085	6.5024
Ga0214976_10100335	uncharacterized protein DUF3343	pfam11823	51.2772	30.8332	56.262	34.1224	30.184	2.54539	0	5.8599	4.96916
Ga0214976_10100336	outer membrane protein	KO:K06142	235.149	108.754	158.762	125.398	105.785	11.4186	7.77298	48.1936	16.3472
Ga0214976_10100337	pilus assembly protein FimV	KO:K08086	185.541	167.579	157.22	164.081	116.985	13.082	9.84271	68.1592	15.9954
Ga0214976_10102561	argininosuccinate lyase	KO:K01755	24.8997	14.4574	23.2865	19.0424	13.3101	0.993122	0.676048	1.71475	0.452385
Ga0214976_10102562	exopolyphosphatase/guanosine-5'-triphosphate,3'-diphosphate pyrophosphatase	KO:K01524	8.39956	3.22156	7.48886	6.68852	7.3077	0.367455	1.50083	1.12792	0
Ga0214976_10102563	hypothetical protein	KO:K09009	56.6265	26.0721	41.4356	34.072	23.2185	2.68525	2.19352	9.06675	2.20172
Ga0214976_10102564	S1 RNA binding domain protein	KO:K07571	131.424	53.4156	48.8466	70.9939	63.0292	3.7797	4.41078	44.7505	5.90304
Ga0214976_10102565	hypothetical protein	Hypo-rule applied	103.641	42.4468	39.0375	67.5101	84.0026	5.48872	8.96721	49.2801	4.50038
Ga0214976_10109641	glycerol-3-phosphate dehydrogenase	KO:K00111	21.233	14.4327	13.9517	17.3617	11.0117	1.21288	0.928851	6.45708	1.65747
Ga0214976_10109642	thioredoxin reductase/threonine dehydrogenase-like Zn-dependent dehydrogenase	COG0492,COG1063	19.0603	12.5043	12.109	15.4103	6.26324	0.185732	0.758599	6.19997	1.14215
Ga0214976_10109643	CxxC motif-containing protein	COG3862	26.6852	13.3134	19.517	19.0651	8.34231	0.292364	0	4.71148	0
Ga0214976_10109644	phosphocarrier protein	KO:K11189	35.4456	25.1233	34.0643	38.675	17.4138	0.895083	7.31172	11.3334	3.05795
Ga0214976_10114991	uncharacterized membrane protein YbjE (DUF340 family)	COG2431	17.7402	9.50253	21.8583	18.2369	11.0161	1.06169	0	4.39951	1.45085
Ga0214976_10114992	SSS family solute:Na+ symporter	KO:K03307	19.1159	10.415	16.4991	14.2014	8.40903	2.0474	0	3.73149	1.51552
Ga0214976_10114993	flagellar hook-associated protein 2	KO:K02407	24.4601	16.0493	21.6343	16.4098	12.0221	2.23452	2.36617	6.47793	0.791673
Ga0214976_10117211	xylulokinase/L-xylulokinase	KO:K00854,KO:K00880	20.6763	14.999	11.5419	17.5343	6.85555	0.52857	0.925234	6.77961	1.13507
Ga0214976_10117212	D-3-phosphoglycerate dehydrogenase	KO:K00058	22.5761	14.5301	11.6521	17.1028	9.10217	0	0.462317	4.42994	1.08278
Ga0214976_10117213	L-fuculose-phosphate aldolase	KO:K01628	53.751	29.4359	35.2835	45.0224	14.5296	1.08411	2.95194	10.3991	1.97532
Ga0214976_10122412	ADP-ribosylglycohydrolase	COG1397	18.1741	8.03664	14.1811	12.2104	5.4667	0.451594	0.614828	1.73274	0.411419
Ga0214976_10122413	uncharacterized linocin/CFP29 family protein	COG1659	556.086	330.576	504.3	410.86	170.768	29.4511	12.9724	101.037	34.3279
Ga0214976_10122414	hypothetical protein	KO:K09700	383.373	238.935	314.647	301.088	123.298	24.0747	0	74.6089	27.8379
Ga0214976_10122415	drug/metabolite transporter (DMT)-like permease	COG0697	28.3664	12.7696	16.8154	17.837	7.23258	1.11528	1.51841	3.4234	0.254015
Ga0214976_10122661	aminomethyltransferase	KO:K00605	50.036	24.9043	20.8838	29.0705	19.02	1.91278	0	16.8802	3.04957
Ga0214976_10122662	glycine cleavage system H protein	KO:K02437	209.555	125.357	114.5	156.022	76.4152	10.8996	8.42237	56.289	10.0641
Ga0214976_10122663	glycine cleavage system pyridoxal-binding protein P	COG0403	203.981	159.689	161.084	167.845	90.5744	12.0433	10.9703	57.2464	13.6162
Ga0214976_10122664	glycine cleavage system protein P-like pyridoxal-binding family	COG1003	213.084	146.822	125.561	159.073	102.822	11.5441	13.3524	70.3218	20.662
Ga0214976_10133951	simple sugar transport system permease protein	KO:K02057	73.0304	40.5167	72.6915	65.0139	26.9712	3.36391	1.87357	16.5446	8.77603
Ga0214976_10133952	simple sugar transport system permease protein	KO:K02057	83.6576	38.4234	55.3341	43.9485	30.3542	3.06213	4.02007	14.8543	4.9318
Ga0214976_10133953	simple sugar transport system ATP-binding protein	KO:K02056	43.8402	32.5887	23.9089	31.5575	32.2754	3.28478	2.43933	18.3323	2.7205
Ga0214976_10156241	acyl-CoA reductase-like NAD-dependent aldehyde dehydrogenase	COG1012	93.3296	80.9122	44.9791	79.7228	27.44	4.39404	3.98821	38.7772	16.1237
Ga0214976_10156242	uncharacterized ion transporter superfamily protein YfcC	COG1288	81.7371	51.7629	80.1166	74.3413	29.3544	4.92012	3.01435	20.9548	15.1281
			117.762	67.2895	87.7051	79.9911	50.2908	5.86716	4.80945	27.4219	7.42733
